# Supplementary material
Source: publisher figshare collection journal article supplement (https://gsajournals.figshare.com/ndownloader/files/22079775)
Supplement: Supplementary file 1 [file 22079775]

## Sheet: T4_LL_GO
X1	Category	ID	Term	Genes	adj_pval
1	MF	GO:0020037	heme binding	gene11900:100136378, gene14213:106607496, gene23207:100136926, gene37891:106576803, gene4157:106582110, gene44423:106583303, gene48784:100136916, gene4980:106590030, gene5016:106590330, gene7293:106600825	1.6e-07
2	MF	GO:0001222	transcription corepressor binding	gene11900:100136378, gene14213:106607496, gene4157:106582110, gene44423:106583303, gene7293:106600825	1.8e-05
3	MF	GO:0016494	C-X-C chemokine receptor activity	gene29763:100195489, gene47375:100306754, gene5779:106597311, gene6708:106600212	2.5e-05
4	MF	GO:0001078	transcriptional repressor activity, RNA ...	gene11900:100136378, gene13852:106607080, gene14213:106607496, gene16077:106609245, gene2377:106564765, gene4157:106582110, gene41882:106580735, gene44423:106583303, gene4931:106589539, gene7293:106600825, gene7693:106601356	7.8e-05
5	MF	GO:0003707	steroid hormone receptor activity	gene11900:100136378, gene14213:106607496, gene4157:106582110, gene41882:106580735, gene44423:106583303, gene7293:106600825	0.00012
6	MF	GO:0001046	core promoter sequence-specific DNA bind...	gene11900:100136378, gene13852:106607080, gene14213:106607496, gene4157:106582110, gene41882:106580735, gene44423:106583303, gene44651:106583488, gene4931:106589539, gene7293:106600825, gene7693:106601356	0.00013
7	MF	GO:0070379	high mobility group box 1 binding	gene15093:106608273, gene497:106589077	0.00043
8	MF	GO:0004887	thyroid hormone receptor activity	gene14213:106607496, gene4157:106582110, gene7293:106600825	0.00059
9	MF	GO:0001206	transcriptional repressor activity, RNA ...	gene10188:106603639, gene12283:106605616, gene28770:106567727	0.00092
10	MF	GO:0004740	pyruvate dehydrogenase (acetyl-transferr...	gene14239:106607477, gene7265:106600850	0.00119
11	MF	GO:0000977	RNA polymerase II regulatory region sequ...	gene10188:106603639, gene11900:100136378, gene12283:106605616, gene13721:106606950, gene13852:106607080, gene13950:106607162, gene14213:106607496, gene15093:106608273, gene16077:106609245, gene2377:106564765, gene28770:106567727, gene34008:106572869, gene4157:106582110, gene41882:106580735, gene44423:106583303, gene4931:106589539, gene497:106589077, gene6530:106599739, gene7293:106600825, gene760…	0.00131
12	MF	GO:0008519	ammonium transmembrane transporter activ...	gene18047:106611136, gene23086:106562250, gene27580:106566494, gene48247:106587027	0.00134
13	MF	GO:0008144	drug binding	gene26209:106565346, gene3869:106579093, gene3889:106579025, gene44582:100196052, gene47375:100306754, gene48247:106587027, gene6708:106600212	0.00163
14	MF	GO:0042803	protein homodimerization activity	gene10188:106603639, gene1100:106604996, gene12283:106605616, gene13721:106606950, gene13950:106607162, gene14239:106607477, gene16064:106609152, gene16077:106609245, gene18047:106611136, gene18566:106611581, gene2715:106567959, gene2866:106569712, gene28770:106567727, gene32862:100380418, gene42294:106581151, gene43271:106582091, gene43813:106582660, gene43983:106582826, gene4714:106587516, gene…	0.00175
15	MF	GO:0035757	chemokine (C-C motif) ligand 19 binding	gene29763:100195489, gene5779:106597311	0.0023
16	MF	GO:0035758	chemokine (C-C motif) ligand 21 binding	gene29763:100195489, gene5779:106597311	0.0023
17	MF	GO:0038121	C-C motif chemokine 21 receptor activity	gene29763:100195489, gene5779:106597311	0.0023
18	MF	GO:0038117	C-C motif chemokine 19 receptor activity	gene29763:100195489, gene5779:106597311	0.0023
19	MF	GO:0070330	aromatase activity	gene23207:100136926, gene48784:100136916	0.0023
20	MF	GO:0003714	transcription corepressor activity	gene11900:100136378, gene12283:106605616, gene13852:106607080, gene14213:106607496, gene2377:106564765, gene4157:106582110, gene41644:106580522, gene44423:106583303, gene4931:106589539, gene7293:106600825, gene7693:106601356	0.00309
21	MF	GO:0004676	3-phosphoinositide-dependent protein kin...	gene14239:106607477, gene7265:106600850	0.00376
22	MF	GO:0015238	drug transmembrane transporter activity	gene35081:106573936, gene35582:106574544, gene48247:106587027	0.00396
23	MF	GO:0004630	phospholipase D activity	gene4980:106590030, gene5016:106590330	0.00432
24	MF	GO:0005332	gamma-aminobutyric acid:sodium symporter...	gene27580:106566494, gene45776:106584498	0.00491
25	MF	GO:0005275	amine transmembrane transporter activity	gene38905:106577803, gene48247:106587027	0.00555
26	MF	GO:0004879	RNA polymerase II transcription factor a...	gene11900:100136378, gene14213:106607496, gene4157:106582110, gene41882:106580735, gene44423:106583303, gene51815:106590294, gene7293:106600825	0.0062
27	MF	GO:0005131	growth hormone receptor binding	gene26826:106565979, gene28441:106567289	0.00621
28	MF	GO:0030215	semaphorin receptor binding	gene28033:106566773, gene40238:106579272, gene43926:106582759	0.00673
29	MF	GO:0019103	pyrimidine nucleotide binding	gene18767:106611738, gene32862:100380418	0.00765
30	MF	GO:0099600	transmembrane receptor activity	gene1100:106604996, gene13469:106606823, gene16064:106609152, gene18189:106611249, gene18767:106611738, gene22400:100136366, gene22974:106562111, gene26498:106565668, gene2715:106567959, gene29763:100195489, gene30144:106568821, gene34008:106572869, gene34016:106572862, gene34605:106573471, gene3889:106579025, gene40238:106579272, gene47375:100306754, gene47850:106586618, gene5779:106597311, gene…	0.00814
31	MF	GO:0016493	C-C chemokine receptor activity	gene29763:100195489, gene47375:100306754, gene5779:106597311, gene6708:106600212	0.00822
32	MF	GO:0009881	photoreceptor activity	gene1100:106604996, gene44651:106583488	0.00842
33	MF	GO:0031686	A1 adenosine receptor binding	gene18767:106611738, gene34008:106572869	0.00842
34	MF	GO:0030165	PDZ domain binding	gene14257:106607467, gene15093:106608273, gene22400:100136366, gene36296:106575175, gene40618:106579507, gene42294:106581151, gene497:106589077	0.01073
35	MF	GO:0038023	signaling receptor activity	gene1100:106604996, gene11900:100136378, gene13469:106606823, gene14213:106607496, gene16064:106609152, gene18189:106611249, gene18767:106611738, gene22974:106562111, gene26498:106565668, gene2715:106567959, gene29763:100195489, gene30144:106568821, gene34008:106572869, gene34016:106572862, gene34605:106573471, gene3889:106579025, gene40238:106579272, gene4157:106582110, gene41882:106580735, gene…	0.01076
36	MF	GO:0004888	transmembrane signaling receptor activit...	gene1100:106604996, gene13469:106606823, gene16064:106609152, gene18189:106611249, gene18767:106611738, gene22974:106562111, gene26498:106565668, gene2715:106567959, gene29763:100195489, gene30144:106568821, gene34008:106572869, gene34016:106572862, gene34605:106573471, gene3889:106579025, gene40238:106579272, gene47375:100306754, gene47850:106586618, gene5779:106597311, gene6708:106600212	0.01093
37	MF	GO:0019899	enzyme binding	gene12981:106606328, gene13721:106606950, gene13950:106607162, gene13954:106607159, gene14239:106607477, gene14257:106607467, gene15999:106609100, gene16064:106609152, gene18957:106611923, gene19139:100194634, gene19475:106612460, gene20633:106613622, gene21711:106561019, gene22400:100136366, gene22974:106562111, gene23183:106562338, gene23243:106562395, gene24198:106563184, gene25538:106564658, …	0.01175
38	MF	GO:0038191	neuropilin binding	gene28033:106566773, gene43926:106582759	0.01182
39	MF	GO:0043426	MRF binding	gene10745:106604170, gene19280:106612265	0.01182
40	MF	GO:0015215	nucleotide transmembrane transporter act...	gene24195:106563187, gene41227:106579972, gene50748:106589263	0.01262
41	MF	GO:0016595	glutamate binding	gene3889:106579025, gene61616:106594092	0.01275
42	MF	GO:0072349	modified amino acid transmembrane transp...	gene27580:106566494, gene35582:106574544	0.0147
43	MF	GO:0015101	organic cation transmembrane transporter...	gene18047:106611136, gene38905:106577803	0.0147
44	MF	GO:0019958	C-X-C chemokine binding	gene29763:100195489, gene5779:106597311	0.0147
45	MF	GO:0016830	carbon-carbon lyase activity	gene18047:106611136, gene44651:106583488, gene61616:106594092	0.01612
46	MF	GO:0004930	G-protein coupled receptor activity	gene1100:106604996, gene13469:106606823, gene16064:106609152, gene18767:106611738, gene26498:106565668, gene29763:100195489, gene34016:106572862, gene3889:106579025, gene47375:100306754, gene47850:106586618, gene5779:106597311, gene6708:106600212	0.01757
47	MF	GO:0015605	organophosphate ester transmembrane tran...	gene24195:106563187, gene41227:106579972, gene50748:106589263	0.01777
48	MF	GO:0008134	transcription factor binding	gene10745:106604170, gene11900:100136378, gene13721:106606950, gene13950:106607162, gene13954:106607159, gene14213:106607496, gene15093:106608273, gene18957:106611923, gene19280:106612265, gene19475:106612460, gene23183:106562338, gene23243:106562395, gene34008:106572869, gene38727:106577610, gene4157:106582110, gene41882:106580735, gene44237:106583131, gene44423:106583303, gene44651:106583488, g…	0.01782
49	MF	GO:0015932	nucleobase-containing compound transmemb...	gene24195:106563187, gene41227:106579972, gene50748:106589263	0.02135
50	MF	GO:0031072	heat shock protein binding	gene26209:106565346, gene2866:106569712, gene34008:106572869, gene44582:100196052, gene48247:106587027, gene51815:106590294	0.02225
51	MF	GO:0019902	phosphatase binding	gene13954:106607159, gene15999:106609100, gene19139:100194634, gene28479:106567379, gene32862:100380418, gene34891:106573584, gene44651:106583488, gene45901:106584628, gene7605:100194913	0.02318
52	MF	GO:0005328	neurotransmitter:sodium symporter activi...	gene27580:106566494, gene45776:106584498	0.02367
53	MF	GO:0032027	myosin light chain binding	gene47375:100306754, gene6708:106600212	0.02367
54	MF	GO:0043014	alpha-tubulin binding	gene18957:106611923, gene38727:106577610, gene6399:106599387	0.02393
55	MF	GO:1901677	phosphate transmembrane transporter acti...	gene24195:106563187, gene41227:106579972, gene50748:106589263	0.02461
56	MF	GO:0071949	FAD binding	gene44651:106583488, gene52147:106590608	0.02619
57	MF	GO:0015216	purine nucleotide transmembrane transpor...	gene41227:106579972, gene50748:106589263	0.02619
58	MF	GO:0042165	neurotransmitter binding	gene27580:106566494, gene45776:106584498	0.02748
59	MF	GO:0016705	oxidoreductase activity, acting on paire...	gene23207:100136926, gene37891:106576803, gene3869:106579093, gene48784:100136916, gene4980:106590030, gene5016:106590330, gene816:106601984	0.02837
60	MF	GO:0016004	phospholipase activator activity	gene14239:106607477, gene7265:106600850	0.03016
61	MF	GO:0015026	coreceptor activity	gene47375:100306754, gene6708:106600212	0.03153
62	MF	GO:0023023	MHC protein complex binding	gene32862:100380418, gene34008:106572869	0.03153
63	MF	GO:0023026	MHC class II protein complex binding	gene32862:100380418, gene34008:106572869	0.03153
64	MF	GO:0015192	L-phenylalanine transmembrane transporte...	gene38905:106577803	0.03266
65	MF	GO:0005250	A-type (transient outward) potassium cha...	gene2377:106564765	0.03266
66	MF	GO:0009882	blue light photoreceptor activity	gene44651:106583488	0.03266
67	MF	GO:0031893	vasopressin receptor binding	gene16064:106609152	0.03266
68	MF	GO:0042943	D-amino acid transmembrane transporter a...	gene38905:106577803	0.03266
69	MF	GO:0042945	D-serine transmembrane transporter activ...	gene38905:106577803	0.03266
70	MF	GO:0060229	lipase activator activity	gene14239:106607477, gene7265:106600850	0.03293
71	MF	GO:0008198	ferrous iron binding	gene21390:106560584, gene816:106601984	0.03293
72	MF	GO:0005540	hyaluronic acid binding	gene22974:106562111, gene34891:106573584	0.03293
73	MF	GO:0045499	chemorepellent activity	gene28033:106566773, gene43926:106582759	0.03293
74	MF	GO:0005527	macrolide binding	gene26209:106565346, gene44582:100196052	0.03435
75	MF	GO:0005528	FK506 binding	gene26209:106565346, gene44582:100196052	0.03435
76	MF	GO:0050660	flavin adenine dinucleotide binding	gene3869:106579093, gene44651:106583488, gene52147:106590608	0.03507
77	MF	GO:0004871	signal transducer activity	gene1100:106604996, gene11900:100136378, gene13469:106606823, gene14213:106607496, gene16064:106609152, gene18189:106611249, gene18767:106611738, gene22974:106562111, gene26498:106565668, gene2715:106567959, gene29763:100195489, gene30144:106568821, gene34008:106572869, gene34016:106572862, gene34605:106573471, gene3889:106579025, gene40238:106579272, gene4157:106582110, gene41882:106580735, gene…	0.03771
78	MF	GO:0005506	iron ion binding	gene21390:106560584, gene23207:100136926, gene48784:100136916, gene816:106601984	0.03778
79	MF	GO:0003904	deoxyribodipyrimidine photo-lyase activi...	gene44651:106583488	0.03906
80	MF	GO:0002135	CTP binding	gene32862:100380418	0.03906
81	MF	GO:0004459	L-lactate dehydrogenase activity	gene21503:100194556	0.03906
82	MF	GO:0003913	DNA photolyase activity	gene44651:106583488	0.03906
83	MF	GO:0003914	DNA (6-4) photolyase activity	gene44651:106583488	0.03906
84	MF	GO:0008514	organic anion transmembrane transporter ...	gene22400:100136366, gene27580:106566494, gene35582:106574544, gene36040:106574970, gene38905:106577803, gene41227:106579972, gene45776:106584498	0.03969
85	MF	GO:0004683	calmodulin-dependent protein kinase acti...	gene14257:106607467, gene43924:106582757, gene45630:106584368	0.04104
86	MF	GO:0035035	histone acetyltransferase binding	gene13721:106606950, gene13950:106607162, gene7609:106601241	0.04374
87	MF	GO:0015196	L-tryptophan transmembrane transporter a...	gene38905:106577803	0.04542
88	MF	GO:0034634	glutathione transmembrane transporter ac...	gene35582:106574544	0.04542
89	MF	GO:0071997	glutathione S-conjugate-transporting ATP...	gene35582:106574544	0.04542
90	MF	GO:0004382	guanosine-diphosphatase activity	gene17920:106611031	0.04542
91	MF	GO:0042979	ornithine decarboxylase regulator activi...	gene18047:106611136	0.04542
92	MF	GO:0042937	tripeptide transporter activity	gene35582:106574544	0.04542
93	MF	GO:0031798	type 1 metabotropic glutamate receptor b...	gene41882:106580735	0.04542
94	MF	GO:0032767	copper-dependent protein binding	gene44582:100196052	0.04542
95	MF	GO:0015431	glutathione S-conjugate-exporting ATPase...	gene35582:106574544	0.04542
96	MF	GO:0031404	chloride ion binding	gene1100:106604996	0.04542
97	MF	GO:0005326	neurotransmitter transporter activity	gene27580:106566494, gene45776:106584498	0.04815
98	MF	GO:0017017	MAP kinase tyrosine/serine/threonine pho...	gene2341:106564343, gene34283:106573116	0.04979
99	BP	GO:0070859	positive regulation of bile acid biosynt...	gene11900:100136378, gene14213:106607496, gene4157:106582110, gene44423:106583303, gene7293:106600825	1.8e-08
100	BP	GO:0060086	circadian temperature homeostasis	gene11900:100136378, gene14213:106607496, gene4157:106582110, gene44423:106583303, gene7293:106600825	8.6e-08
101	BP	GO:0034144	negative regulation of toll-like recepto...	gene11900:100136378, gene14213:106607496, gene4157:106582110, gene44423:106583303, gene7293:106600825	5.7e-07
102	BP	GO:2000189	positive regulation of cholesterol homeo...	gene11900:100136378, gene14213:106607496, gene4157:106582110, gene44423:106583303, gene7293:106600825	7e-07
103	BP	GO:0061469	regulation of type B pancreatic cell pro...	gene11900:100136378, gene14213:106607496, gene4157:106582110, gene44423:106583303, gene7293:106600825	1.8e-06
104	BP	GO:0010871	negative regulation of receptor biosynth...	gene11900:100136378, gene14213:106607496, gene4157:106582110, gene44423:106583303, gene7293:106600825	6.2e-06
105	BP	GO:0061178	regulation of insulin secretion involved...	gene11900:100136378, gene14213:106607496, gene22400:100136366, gene29080:106567822, gene36040:106574970, gene4157:106582110, gene44423:106583303, gene71096:106592036, gene7293:106600825	7.3e-06
106	BP	GO:2000505	regulation of energy homeostasis	gene11900:100136378, gene14213:106607496, gene18957:106611923, gene38727:106577610, gene4157:106582110, gene44423:106583303, gene7293:106600825	7.6e-06
107	BP	GO:2001014	regulation of skeletal muscle cell diffe...	gene11900:100136378, gene14213:106607496, gene26325:106565435, gene4157:106582110, gene44423:106583303, gene7293:106600825	9e-06
108	BP	GO:0035947	regulation of gluconeogenesis by regulat...	gene11900:100136378, gene14213:106607496, gene4157:106582110, gene44423:106583303, gene7293:106600825	9.1e-06
109	BP	GO:0032922	circadian regulation of gene expression	gene11332:106604687, gene11900:100136378, gene14213:106607496, gene18957:106611923, gene38727:106577610, gene4157:106582110, gene44423:106583303, gene44651:106583488, gene7293:106600825	2.1e-05
110	BP	GO:0044321	response to leptin	gene11900:100136378, gene14213:106607496, gene4157:106582110, gene44423:106583303, gene7293:106600825	2.4e-05
111	BP	GO:0043619	regulation of transcription from RNA pol...	gene13721:106606950, gene13950:106607162, gene4980:106590030, gene5016:106590330, gene7609:106601241	2.4e-05
112	BP	GO:0007479	leg disc proximal/distal pattern formati...	gene15093:106608273, gene25538:106564658, gene497:106589077	8.8e-05
113	BP	GO:0042752	regulation of circadian rhythm	gene11332:106604687, gene11900:100136378, gene14213:106607496, gene18957:106611923, gene19475:106612460, gene38727:106577610, gene4157:106582110, gene44423:106583303, gene44651:106583488, gene7293:106600825	0.00012
114	BP	GO:0015695	organic cation transport	gene18047:106611136, gene35081:106573936, gene35582:106574544, gene38905:106577803	0.00018
115	BP	GO:0008037	cell recognition	gene25538:106564658, gene26964:106566029, gene28033:106566773, gene29763:100195489, gene34008:106572869, gene34891:106573584, gene42294:106581151, gene43926:106582759, gene47375:100306754, gene5779:106597311, gene6399:106599387, gene6708:106600212, gene8765:106602328	0.00027
116	BP	GO:0045598	regulation of fat cell differentiation	gene10188:106603639, gene11332:106604687, gene11900:100136378, gene12283:106605616, gene14213:106607496, gene28770:106567727, gene4157:106582110, gene44423:106583303, gene71096:106592036, gene7293:106600825	0.00036
117	BP	GO:0048662	negative regulation of smooth muscle cel...	gene18957:106611923, gene38727:106577610, gene41882:106580735, gene4980:106590030, gene5016:106590330	0.00037
118	BP	GO:0035864	response to potassium ion	gene18957:106611923, gene38727:106577610, gene44299:106583079, gene48247:106587027	0.00046
119	BP	GO:0018990	ecdysis, chitin-based cuticle	gene14213:106607496, gene4157:106582110	0.00047
120	BP	GO:0007204	positive regulation of cytosolic calcium...	gene14239:106607477, gene16064:106609152, gene18339:106611380, gene18767:106611738, gene29763:100195489, gene41882:106580735, gene43038:106581900, gene47375:100306754, gene5779:106597311, gene6708:106600212, gene71096:106592036, gene7265:106600850, gene8765:106602328	0.00049
121	BP	GO:0019722	calcium-mediated signaling	gene13954:106607159, gene14239:106607477, gene16064:106609152, gene18566:106611581, gene3889:106579025, gene43038:106581900, gene47375:100306754, gene47850:106586618, gene6708:106600212, gene7265:106600850, gene7605:100194913	0.00057
122	BP	GO:0030720	oocyte localization involved in germariu...	gene15093:106608273, gene497:106589077	0.0007
123	BP	GO:0014805	smooth muscle adaptation	gene4980:106590030, gene5016:106590330	0.0007
124	BP	GO:0043305	negative regulation of mast cell degranu...	gene4980:106590030, gene5016:106590330, gene6530:106599739	0.00075
125	BP	GO:0005978	glycogen biosynthetic process	gene11900:100136378, gene14213:106607496, gene2866:106569712, gene4157:106582110, gene44423:106583303, gene7293:106600825	0.00077
126	BP	GO:0071415	cellular response to purine-containing c...	gene18767:106611738, gene18957:106611923, gene38727:106577610	0.00093
127	BP	GO:0010359	regulation of anion channel activity	gene22400:100136366, gene36040:106574970, gene4714:106587516	0.00093
128	BP	GO:0035634	response to stilbenoid	gene18957:106611923, gene38727:106577610	0.00097
129	BP	GO:0045080	positive regulation of chemokine biosynt...	gene4980:106590030, gene5016:106590330	0.00097
130	BP	GO:0007329	positive regulation of transcription fro...	gene18957:106611923, gene38727:106577610	0.00097
131	BP	GO:2000184	positive regulation of progesterone bios...	gene18957:106611923, gene38727:106577610	0.00097
132	BP	GO:0036273	response to statin	gene18957:106611923, gene38727:106577610	0.00097
133	BP	GO:0071456	cellular response to hypoxia	gene13721:106606950, gene13950:106607162, gene14239:106607477, gene18957:106611923, gene30432:106569334, gene38727:106577610, gene3889:106579025, gene4980:106590030, gene5016:106590330, gene7265:106600850, gene7609:106601241, gene816:106601984	0.00102
134	BP	GO:0042026	protein refolding	gene2866:106569712, gene32862:100380418, gene34008:106572869, gene7092:106600736	0.00107
135	BP	GO:0002931	response to ischemia	gene18957:106611923, gene19139:100194634, gene38727:106577610, gene3889:106579025, gene4714:106587516	0.00123
136	BP	GO:0034395	regulation of transcription from RNA pol...	gene4980:106590030, gene5016:106590330	0.00129
137	BP	GO:0014900	muscle hyperplasia	gene4980:106590030, gene5016:106590330	0.00129
138	BP	GO:0007553	regulation of ecdysteroid metabolic proc...	gene14213:106607496, gene4157:106582110	0.00129
139	BP	GO:0055072	iron ion homeostasis	gene13721:106606950, gene13950:106607162, gene21390:106560584, gene24198:106563184, gene4980:106590030, gene5016:106590330, gene7609:106601241	0.0014
140	BP	GO:0007623	circadian rhythm	gene11332:106604687, gene11900:100136378, gene13721:106606950, gene13852:106607080, gene13950:106607162, gene14213:106607496, gene18957:106611923, gene19475:106612460, gene25538:106564658, gene38727:106577610, gene4157:106582110, gene44423:106583303, gene44651:106583488, gene4931:106589539, gene7293:106600825, gene7609:106601241, gene7693:106601356	0.00144
141	BP	GO:0021511	spinal cord patterning	gene15093:106608273, gene26325:106565435, gene26964:106566029, gene497:106589077	0.00149
142	BP	GO:0006885	regulation of pH	gene14239:106607477, gene16064:106609152, gene22400:100136366, gene23086:106562250, gene24198:106563184, gene7265:106600850	0.00151
143	BP	GO:0002027	regulation of heart rate	gene13721:106606950, gene13950:106607162, gene16064:106609152, gene28033:106566773, gene43038:106581900, gene43926:106582759, gene71096:106592036, gene7609:106601241	0.00161
144	BP	GO:0006964	positive regulation of biosynthetic proc...	gene15093:106608273, gene497:106589077	0.00165
145	BP	GO:0048133	male germ-line stem cell asymmetric divi...	gene10188:106603639, gene28770:106567727	0.00165
146	BP	GO:1903588	negative regulation of blood vessel endo...	gene15093:106608273, gene497:106589077	0.00165
147	BP	GO:1901860	positive regulation of mitochondrial DNA...	gene18957:106611923, gene38727:106577610	0.00165
148	BP	GO:1901558	response to metformin	gene18957:106611923, gene38727:106577610	0.00165
149	BP	GO:0000302	response to reactive oxygen species	gene14239:106607477, gene18957:106611923, gene29080:106567822, gene30144:106568821, gene34008:106572869, gene37891:106576803, gene38727:106577610, gene44299:106583079, gene4980:106590030, gene5016:106590330, gene5779:106597311, gene7265:106600850, gene816:106601984	0.00167
150	BP	GO:0014070	response to organic cyclic compound	gene11900:100136378, gene14213:106607496, gene14257:106607467, gene15999:106609100, gene16064:106609152, gene18767:106611738, gene18957:106611923, gene22400:100136366, gene22974:106562111, gene23207:100136926, gene2341:106564343, gene25538:106564658, gene26325:106565435, gene26826:106565979, gene2707:106568012, gene28441:106567289, gene2866:106569712, gene29984:106569003, gene30144:106568821, gen…	0.00167
151	BP	GO:0007186	G-protein coupled receptor signaling pat...	gene1100:106604996, gene13469:106606823, gene16064:106609152, gene18767:106611738, gene20633:106613622, gene26498:106565668, gene26964:106566029, gene28441:106567289, gene29763:100195489, gene34009:106572868, gene34016:106572862, gene3889:106579025, gene41882:106580735, gene44651:106583488, gene44888:106583691, gene47375:100306754, gene47850:106586618, gene5779:106597311, gene6061:106598526, gene…	0.00191
152	BP	GO:0042167	heme catabolic process	gene4980:106590030, gene5016:106590330	0.00206
153	BP	GO:0051552	flavone metabolic process	gene18957:106611923, gene38727:106577610	0.00206
154	BP	GO:0016319	mushroom body development	gene15093:106608273, gene2341:106564343, gene497:106589077	0.00212
155	BP	GO:0035215	genital disc development	gene15093:106608273, gene25538:106564658, gene497:106589077	0.00212
156	BP	GO:0071353	cellular response to interleukin-4	gene13852:106607080, gene4931:106589539, gene7693:106601356, gene8765:106602328	0.0022
157	BP	GO:0032332	positive regulation of chondrocyte diffe...	gene10188:106603639, gene12283:106605616, gene28770:106567727, gene41644:106580522	0.0022
158	BP	GO:0048625	myoblast fate commitment	gene13721:106606950, gene13950:106607162, gene7609:106601241	0.00229
159	BP	GO:0061550	cranial ganglion development	gene28033:106566773, gene34605:106573471, gene43926:106582759	0.00246
160	BP	GO:0070236	negative regulation of activation-induce...	gene10745:106604170, gene19280:106612265	0.0025
161	BP	GO:0033353	S-adenosylmethionine cycle	gene34009:106572868, gene52147:106590608	0.0025
162	BP	GO:0032764	negative regulation of mast cell cytokin...	gene4980:106590030, gene5016:106590330	0.0025
163	BP	GO:0038115	chemokine (C-C motif) ligand 19 signalin...	gene29763:100195489, gene5779:106597311	0.0025
164	BP	GO:0038116	chemokine (C-C motif) ligand 21 signalin...	gene29763:100195489, gene5779:106597311	0.0025
165	BP	GO:0018298	protein-chromophore linkage	gene1100:106604996, gene44651:106583488	0.0025
166	BP	GO:2000522	positive regulation of immunological syn...	gene29763:100195489, gene5779:106597311	0.0025
167	BP	GO:2000526	positive regulation of glycoprotein bios...	gene29763:100195489, gene5779:106597311	0.0025
168	BP	GO:0071930	negative regulation of transcription inv...	gene23183:106562338, gene23243:106562395	0.0025
169	BP	GO:0001974	blood vessel remodeling	gene13721:106606950, gene13950:106607162, gene15093:106608273, gene43926:106582759, gene497:106589077, gene7609:106601241	0.00252
170	BP	GO:0071222	cellular response to lipopolysaccharide	gene11900:100136378, gene14213:106607496, gene18767:106611738, gene18957:106611923, gene38727:106577610, gene4157:106582110, gene43038:106581900, gene44423:106583303, gene7293:106600825	0.00257
171	BP	GO:0048368	lateral mesoderm development	gene15093:106608273, gene2715:106567959, gene497:106589077, gene6530:106599739	0.00264
172	BP	GO:0090280	positive regulation of calcium ion impor...	gene14239:106607477, gene14257:106607467, gene18339:106611380, gene3889:106579025, gene7265:106600850	0.00274
173	BP	GO:0000122	negative regulation of transcription fro...	gene10188:106603639, gene10745:106604170, gene11900:100136378, gene12283:106605616, gene13852:106607080, gene14213:106607496, gene14257:106607467, gene15093:106608273, gene16077:106609245, gene18566:106611581, gene19280:106612265, gene19475:106612460, gene23183:106562338, gene23243:106562395, gene2377:106564765, gene2715:106567959, gene28770:106567727, gene34008:106572869, gene36040:106574970, ge…	0.00279
174	BP	GO:0048728	proboscis development	gene15093:106608273, gene497:106589077	0.00299
175	BP	GO:2000525	positive regulation of T cell costimulat...	gene29763:100195489, gene5779:106597311	0.00299
176	BP	GO:0001569	patterning of blood vessels	gene15093:106608273, gene28033:106566773, gene43926:106582759, gene47375:100306754, gene497:106589077, gene6708:106600212	0.003
177	BP	GO:0043627	response to estrogen	gene18957:106611923, gene26325:106565435, gene26826:106565979, gene28441:106567289, gene30144:106568821, gene32862:100380418, gene34008:106572869, gene37891:106576803, gene38727:106577610, gene41882:106580735, gene4980:106590030, gene5016:106590330, gene51815:106590294	0.00316
178	BP	GO:0030334	regulation of cell migration	gene14239:106607477, gene15093:106608273, gene18767:106611738, gene18957:106611923, gene25538:106564658, gene28033:106566773, gene29763:100195489, gene33543:106572414, gene35582:106574544, gene37891:106576803, gene38727:106577610, gene40238:106579272, gene41906:106580757, gene43271:106582091, gene43924:106582757, gene43926:106582759, gene47375:100306754, gene497:106589077, gene4980:106590030, gen…	0.00346
179	BP	GO:0006012	galactose metabolic process	gene18957:106611923, gene38727:106577610, gene6399:106599387	0.00348
180	BP	GO:1903944	negative regulation of hepatocyte apopto...	gene23183:106562338, gene23243:106562395	0.00352
181	BP	GO:0002408	myeloid dendritic cell chemotaxis	gene29763:100195489, gene5779:106597311	0.00352
182	BP	GO:0071250	cellular response to nitrite	gene18957:106611923, gene38727:106577610	0.00352
183	BP	GO:0016330	second mitotic wave involved in compound...	gene15093:106608273, gene497:106589077	0.00352
184	BP	GO:0035160	maintenance of epithelial integrity, ope...	gene25538:106564658, gene34283:106573116	0.00352
185	BP	GO:0036011	imaginal disc-derived leg segmentation	gene15093:106608273, gene25538:106564658, gene497:106589077	0.00371
186	BP	GO:0021553	olfactory nerve development	gene15093:106608273, gene2715:106567959, gene497:106589077	0.00395
187	BP	GO:0042387	plasmatocyte differentiation	gene15093:106608273, gene497:106589077	0.00409
188	BP	GO:0042415	norepinephrine metabolic process	gene13721:106606950, gene13950:106607162, gene7609:106601241	0.0042
189	BP	GO:0048714	positive regulation of oligodendrocyte d...	gene18566:106611581, gene47375:100306754, gene6708:106600212	0.0042
190	BP	GO:0048642	negative regulation of skeletal muscle t...	gene10745:106604170, gene19280:106612265, gene26325:106565435	0.0042
191	BP	GO:0060452	positive regulation of cardiac muscle co...	gene32862:100380418, gene6061:106598526, gene71096:106592036	0.0042
192	BP	GO:1900034	regulation of cellular response to heat	gene26209:106565346, gene32862:100380418, gene34008:106572869, gene44582:100196052, gene7092:106600736	0.0045
193	BP	GO:0002407	dendritic cell chemotaxis	gene29763:100195489, gene47375:100306754, gene5779:106597311, gene6708:106600212, gene71096:106592036	0.00457
194	BP	GO:0030099	myeloid cell differentiation	gene10188:106603639, gene12283:106605616, gene13721:106606950, gene13852:106607080, gene13950:106607162, gene15093:106608273, gene23183:106562338, gene23243:106562395, gene2707:106568012, gene28770:106567727, gene29763:100195489, gene38727:106577610, gene41882:106580735, gene4931:106589539, gene497:106589077, gene5779:106597311, gene7609:106601241, gene7693:106601356	0.00458
195	BP	GO:0002246	wound healing involved in inflammatory r...	gene4980:106590030, gene5016:106590330	0.00469
196	BP	GO:0071276	cellular response to cadmium ion	gene34008:106572869, gene4980:106590030, gene5016:106590330	0.005
197	BP	GO:0007589	body fluid secretion	gene10745:106604170, gene14257:106607467, gene18767:106611738, gene19280:106612265, gene26826:106565979, gene28441:106567289, gene4714:106587516	0.00513
198	BP	GO:0006111	regulation of gluconeogenesis	gene11900:100136378, gene14213:106607496, gene14239:106607477, gene19475:106612460, gene38727:106577610, gene4157:106582110, gene44423:106583303, gene7265:106600850, gene7293:106600825	0.00517
199	BP	GO:0032354	response to follicle-stimulating hormone	gene18957:106611923, gene37891:106576803, gene38727:106577610	0.00528
200	BP	GO:0021825	substrate-dependent cerebral cortex tang...	gene2715:106567959, gene28033:106566773, gene43926:106582759	0.00528
201	BP	GO:0043401	steroid hormone mediated signaling pathw...	gene11900:100136378, gene14213:106607496, gene2866:106569712, gene38727:106577610, gene4157:106582110, gene41882:106580735, gene44582:100196052, gene44651:106583488, gene7293:106600825, gene816:106601984	0.00529
202	BP	GO:0002885	positive regulation of hypersensitivity	gene29763:100195489, gene5779:106597311	0.00534
203	BP	GO:0021523	somatic motor neuron differentiation	gene15093:106608273, gene497:106589077	0.00534
204	BP	GO:0007298	border follicle cell migration	gene14257:106607467, gene15093:106608273, gene25538:106564658, gene497:106589077	0.00552
205	BP	GO:0071243	cellular response to arsenic-containing ...	gene45630:106584368, gene4980:106590030, gene5016:106590330	0.00558
206	BP	GO:0010517	regulation of phospholipase activity	gene14239:106607477, gene16064:106609152, gene2715:106567959, gene41882:106580735, gene6061:106598526, gene6180:100194912, gene7265:106600850	0.0056
207	BP	GO:0035914	skeletal muscle cell differentiation	gene11900:100136378, gene13721:106606950, gene13950:106607162, gene14213:106607496, gene23183:106562338, gene23243:106562395, gene26325:106565435, gene4157:106582110, gene44423:106583303, gene7293:106600825, gene7609:106601241	0.00562
208	BP	GO:0043129	surfactant homeostasis	gene13721:106606950, gene13950:106607162, gene7609:106601241	0.00589
209	BP	GO:0071332	cellular response to fructose stimulus	gene18957:106611923, gene38727:106577610	0.00602
210	BP	GO:0051138	positive regulation of NK T cell differe...	gene10188:106603639, gene28770:106567727	0.00602
211	BP	GO:0097411	hypoxia-inducible factor-1alpha signalin...	gene14239:106607477, gene7265:106600850	0.00602
212	BP	GO:0042750	hibernation	gene14239:106607477, gene7265:106600850	0.00602
213	BP	GO:0035912	dorsal aorta morphogenesis	gene15093:106608273, gene497:106589077	0.00675
214	BP	GO:0043201	response to leucine	gene18957:106611923, gene38727:106577610	0.00675
215	BP	GO:2000507	positive regulation of energy homeostasi...	gene18957:106611923, gene38727:106577610	0.00675
216	BP	GO:0097305	response to alcohol	gene14213:106607496, gene16064:106609152, gene18957:106611923, gene19139:100194634, gene25538:106564658, gene26325:106565435, gene26826:106565979, gene28441:106567289, gene34008:106572869, gene37891:106576803, gene38727:106577610, gene3889:106579025, gene4157:106582110, gene41882:106580735, gene43271:106582091, gene44299:106583079, gene48247:106587027, gene51815:106590294	0.00691
217	BP	GO:0010656	negative regulation of muscle cell apopt...	gene14239:106607477, gene34008:106572869, gene4980:106590030, gene5016:106590330, gene7265:106600850	0.00695
218	BP	GO:0001678	cellular glucose homeostasis	gene11900:100136378, gene14213:106607496, gene14239:106607477, gene18957:106611923, gene22400:100136366, gene29080:106567822, gene36040:106574970, gene38727:106577610, gene3889:106579025, gene4157:106582110, gene44423:106583303, gene4714:106587516, gene71096:106592036, gene7265:106600850, gene7293:106600825	0.00712
219	BP	GO:0006855	drug transmembrane transport	gene35081:106573936, gene35582:106574544, gene48247:106587027	0.0072
220	BP	GO:0060445	branching involved in salivary gland mor...	gene2715:106567959, gene28033:106566773, gene43926:106582759, gene44888:106583691	0.00742
221	BP	GO:0010510	regulation of acetyl-CoA biosynthetic pr...	gene14239:106607477, gene7265:106600850	0.00751
222	BP	GO:0055016	hypochord development	gene15093:106608273, gene497:106589077	0.00751
223	BP	GO:0072554	blood vessel lumenization	gene15093:106608273, gene497:106589077	0.00751
224	BP	GO:0060034	notochord cell differentiation	gene15093:106608273, gene497:106589077	0.00751
225	BP	GO:0002606	positive regulation of dendritic cell an...	gene29763:100195489, gene5779:106597311	0.00751
226	BP	GO:0021604	cranial nerve structural organization	gene28033:106566773, gene34605:106573471, gene43926:106582759	0.00756
227	BP	GO:0031670	cellular response to nutrient	gene14239:106607477, gene3889:106579025, gene4980:106590030, gene5016:106590330, gene7265:106600850	0.00763
228	BP	GO:0035357	peroxisome proliferator activated recept...	gene14239:106607477, gene19306:106612291, gene7265:106600850	0.00793
229	BP	GO:0070542	response to fatty acid	gene14239:106607477, gene18767:106611738, gene18957:106611923, gene29080:106567822, gene38727:106577610, gene5779:106597311, gene7265:106600850	0.00807
230	BP	GO:0097067	cellular response to thyroid hormone sti...	gene18957:106611923, gene38727:106577610, gene43271:106582091	0.0083
231	BP	GO:0071371	cellular response to gonadotropin stimul...	gene18957:106611923, gene37891:106576803, gene38727:106577610	0.0083
232	BP	GO:0090209	negative regulation of triglyceride meta...	gene19475:106612460, gene41882:106580735	0.0083
233	BP	GO:1903045	neural crest cell migration involved in ...	gene28033:106566773, gene43926:106582759	0.0083
234	BP	GO:0014878	response to electrical stimulus involved...	gene18957:106611923, gene38727:106577610	0.0083
235	BP	GO:0071526	semaphorin-plexin signaling pathway	gene28033:106566773, gene34605:106573471, gene40238:106579272, gene43926:106582759	0.00889
236	BP	GO:0045608	negative regulation of auditory receptor...	gene15093:106608273, gene497:106589077	0.00913
237	BP	GO:0009635	response to herbicide	gene37891:106576803, gene48247:106587027	0.00913
238	BP	GO:0046320	regulation of fatty acid oxidation	gene14239:106607477, gene18957:106611923, gene38727:106577610, gene7265:106600850	0.00943
239	BP	GO:0030812	negative regulation of nucleotide catabo...	gene18957:106611923, gene38727:106577610, gene816:106601984	0.00949
240	BP	GO:0035006	melanization defense response	gene15093:106608273, gene25538:106564658, gene497:106589077	0.00949
241	BP	GO:0060446	branching involved in open tracheal syst...	gene25538:106564658, gene34283:106573116, gene6530:106599739	0.00949
242	BP	GO:0035150	regulation of tube size	gene16064:106609152, gene18767:106611738, gene25538:106564658, gene3889:106579025, gene4980:106590030, gene5016:106590330, gene6061:106598526, gene71096:106592036	0.0096
243	BP	GO:0061056	sclerotome development	gene15093:106608273, gene497:106589077	0.01
244	BP	GO:0007475	apposition of dorsal and ventral imagina...	gene15093:106608273, gene497:106589077	0.01
245	BP	GO:0097264	self proteolysis	gene18339:106611380, gene18566:106611581	0.01
246	BP	GO:0035469	determination of pancreatic left/right a...	gene15093:106608273, gene497:106589077	0.01
247	BP	GO:1901857	positive regulation of cellular respirat...	gene18957:106611923, gene38727:106577610	0.01
248	BP	GO:0071248	cellular response to metal ion	gene15999:106609100, gene18339:106611380, gene18957:106611923, gene21390:106560584, gene34008:106572869, gene38727:106577610, gene41227:106579972, gene44237:106583131, gene48247:106587027, gene4980:106590030, gene5016:106590330	0.01001
249	CC	GO:0016323	basolateral plasma membrane	gene14257:106607467, gene18767:106611738, gene21390:106560584, gene22400:100136366, gene22974:106562111, gene23086:106562250, gene23207:100136926, gene32862:100380418, gene35582:106574544, gene3889:106579025, gene38905:106577803, gene42294:106581151, gene43271:106582091, gene44299:106583079, gene48784:100136916, gene6399:106599387	9.2e-06
250	CC	GO:0043679	axon terminus	gene2377:106564765, gene24198:106563184, gene26964:106566029, gene30144:106568821, gene34008:106572869, gene3889:106579025, gene41882:106580735, gene44299:106583079, gene48247:106587027, gene61616:106594092	0.0022
251	CC	GO:0035003	subapical complex	gene15093:106608273, gene497:106589077	0.0023
252	CC	GO:0044459	plasma membrane part	gene1100:106604996, gene11824:106605162, gene12163:106605512, gene13469:106606823, gene14257:106607467, gene15093:106608273, gene16064:106609152, gene18566:106611581, gene18767:106611738, gene21390:106560584, gene22400:100136366, gene22974:106562111, gene23086:106562250, gene23207:100136926, gene2377:106564765, gene25538:106564658, gene2715:106567959, gene27580:106566494, gene29763:100195489, gen…	0.0026
253	CC	GO:0098793	presynapse	gene12163:106605512, gene14257:106607467, gene24198:106563184, gene30144:106568821, gene34008:106572869, gene36296:106575175, gene40238:106579272, gene41882:106580735, gene42294:106581151, gene43983:106582826, gene44299:106583079, gene48247:106587027, gene61616:106594092	0.0027
254	CC	GO:0005967	mitochondrial pyruvate dehydrogenase com...	gene14239:106607477, gene7265:106600850	0.0028
255	CC	GO:0031528	microvillus membrane	gene23207:100136926, gene43271:106582091, gene48784:100136916	0.004
256	CC	GO:0016021	integral component of membrane	gene1100:106604996, gene13469:106606823, gene14257:106607467, gene14734:106607948, gene15093:106608273, gene16064:106609152, gene18189:106611249, gene18566:106611581, gene18767:106611738, gene21390:106560584, gene22400:100136366, gene22974:106562111, gene23086:106562250, gene2377:106564765, gene24198:106563184, gene25538:106564658, gene26498:106565668, gene2715:106567959, gene27580:106566494, gen…	0.0043
257	CC	GO:0016023	cytoplasmic, membrane-bounded vesicle	gene12163:106605512, gene14239:106607477, gene15093:106608273, gene17920:106611031, gene18047:106611136, gene21390:106560584, gene22400:100136366, gene24198:106563184, gene2715:106567959, gene30144:106568821, gene30598:106569487, gene32862:100380418, gene33644:106572486, gene34008:106572869, gene35582:106574544, gene40238:106579272, gene41046:106580130, gene42294:106581151, gene43271:106582091, g…	0.0049
258	CC	GO:0005737	cytoplasm	gene10188:106603639, gene10745:106604170, gene1100:106604996, gene11332:106604687, gene11824:106605162, gene11900:100136378, gene12163:106605512, gene12981:106606328, gene13602:106606840, gene13721:106606950, gene13852:106607080, gene13950:106607162, gene13954:106607159, gene14213:106607496, gene14239:106607477, gene14257:106607467, gene14734:106607948, gene15093:106608273, gene15999:106609100, g…	0.0051
259	CC	GO:0030425	dendrite	gene11900:100136378, gene14213:106607496, gene14257:106607467, gene18047:106611136, gene18566:106611581, gene18957:106611923, gene2377:106564765, gene28033:106566773, gene34008:106572869, gene38727:106577610, gene38905:106577803, gene4157:106582110, gene42294:106581151, gene43926:106582759, gene43983:106582826, gene44299:106583079, gene44423:106583303, gene50748:106589263, gene7293:106600825, gen…	0.0067
260	CC	GO:0035189	Rb-E2F complex	gene23183:106562338, gene23243:106562395	0.007
261	CC	GO:0045202	synapse	gene11900:100136378, gene12163:106605512, gene14213:106607496, gene14239:106607477, gene14257:106607467, gene15093:106608273, gene18566:106611581, gene24198:106563184, gene26964:106566029, gene2715:106567959, gene28479:106567379, gene30144:106568821, gene34008:106572869, gene34605:106573471, gene36296:106575175, gene40238:106579272, gene4157:106582110, gene41882:106580735, gene41906:106580757, ge…	0.0073
262	CC	GO:0016324	apical plasma membrane	gene18767:106611738, gene21390:106560584, gene22400:100136366, gene22974:106562111, gene23086:106562250, gene25538:106564658, gene32862:100380418, gene34009:106572868, gene3889:106579025, gene43271:106582091, gene44299:106583079, gene47850:106586618	0.0076
263	CC	GO:0072562	blood microparticle	gene21390:106560584, gene34008:106572869, gene43271:106582091, gene6180:100194912, gene7092:106600736	0.0081
264	CC	GO:0000177	cytoplasmic exosome (RNase complex)	gene13954:106607159, gene7605:100194913	0.0085
265	CC	GO:0009986	cell surface	gene15093:106608273, gene17920:106611031, gene21390:106560584, gene22400:100136366, gene22974:106562111, gene2715:106567959, gene29763:100195489, gene30598:106569487, gene32862:100380418, gene34008:106572869, gene34891:106573584, gene3889:106579025, gene43271:106582091, gene44299:106583079, gene47375:100306754, gene497:106589077, gene5779:106597311, gene6180:100194912, gene6399:106599387, gene670…	0.01
266	CC	GO:0031226	intrinsic component of plasma membrane	gene1100:106604996, gene14257:106607467, gene16064:106609152, gene18566:106611581, gene18767:106611738, gene21390:106560584, gene23086:106562250, gene2377:106564765, gene25538:106564658, gene2715:106567959, gene27580:106566494, gene29763:100195489, gene30144:106568821, gene30598:106569487, gene35582:106574544, gene38905:106577803, gene40238:106579272, gene42294:106581151, gene43983:106582826, gen…	0.014
267	CC	GO:0016605	PML body	gene10188:106603639, gene12283:106605616, gene18566:106611581, gene23183:106562338, gene28770:106567727, gene45630:106584368	0.0152
268	CC	GO:0097458	neuron part	gene1100:106604996, gene11900:100136378, gene12163:106605512, gene14213:106607496, gene14239:106607477, gene14257:106607467, gene18047:106611136, gene18566:106611581, gene18957:106611923, gene2377:106564765, gene24198:106563184, gene26209:106565346, gene26964:106566029, gene27580:106566494, gene28033:106566773, gene2866:106569712, gene30144:106568821, gene32862:100380418, gene34008:106572869, gen…	0.0175
269	CC	GO:0044463	cell projection part	gene1100:106604996, gene11900:100136378, gene14213:106607496, gene14239:106607477, gene14257:106607467, gene18566:106611581, gene23207:100136926, gene2377:106564765, gene24198:106563184, gene26209:106565346, gene26964:106566029, gene30144:106568821, gene32862:100380418, gene34008:106572869, gene3889:106579025, gene4157:106582110, gene41882:106580735, gene41906:106580757, gene42294:106581151, gene…	0.0195
270	CC	GO:0016607	nuclear speck	gene10188:106603639, gene12283:106605616, gene13721:106606950, gene13950:106607162, gene28770:106567727, gene44237:106583131, gene7609:106601241	0.0217
271	CC	GO:0005887	integral component of plasma membrane	gene1100:106604996, gene14257:106607467, gene16064:106609152, gene18566:106611581, gene18767:106611738, gene21390:106560584, gene23086:106562250, gene2377:106564765, gene25538:106564658, gene2715:106567959, gene27580:106566494, gene29763:100195489, gene30144:106568821, gene35582:106574544, gene38905:106577803, gene40238:106579272, gene42294:106581151, gene43983:106582826, gene44299:106583079, gen…	0.0247
272	CC	GO:0043025	neuronal cell body	gene18047:106611136, gene18957:106611923, gene2377:106564765, gene2866:106569712, gene32862:100380418, gene34008:106572869, gene38727:106577610, gene3889:106579025, gene41882:106580735, gene42294:106581151, gene43038:106581900, gene43813:106582660, gene44299:106583079, gene44582:100196052, gene48247:106587027, gene50748:106589263, gene71096:106592036, gene816:106601984	0.025
273	CC	GO:0043195	terminal bouton	gene24198:106563184, gene30144:106568821, gene34008:106572869, gene41882:106580735, gene44299:106583079, gene48247:106587027	0.0256
274	CC	GO:0012506	vesicle membrane	gene12163:106605512, gene17920:106611031, gene21390:106560584, gene22400:100136366, gene24198:106563184, gene30598:106569487, gene33644:106572486, gene35582:106574544, gene40238:106579272, gene43271:106582091, gene43924:106582757, gene47850:106586618, gene48247:106587027	0.0304
275	CC	GO:0044297	cell body	gene1100:106604996, gene18047:106611136, gene18957:106611923, gene2377:106564765, gene2866:106569712, gene32862:100380418, gene34008:106572869, gene38727:106577610, gene3889:106579025, gene41882:106580735, gene42294:106581151, gene43038:106581900, gene43813:106582660, gene44299:106583079, gene44582:100196052, gene48247:106587027, gene50748:106589263, gene71096:106592036, gene816:106601984	0.0305
276	CC	GO:0005886	plasma membrane	gene10188:106603639, gene1100:106604996, gene11824:106605162, gene12163:106605512, gene12981:106606328, gene13469:106606823, gene14239:106607477, gene14257:106607467, gene15093:106608273, gene16064:106609152, gene17920:106611031, gene18189:106611249, gene18339:106611380, gene18566:106611581, gene18767:106611738, gene20633:106613622, gene21390:106560584, gene22400:100136366, gene22974:106562111, g…	0.0305
277	CC	GO:0043204	perikaryon	gene18047:106611136, gene34008:106572869, gene41882:106580735, gene43038:106581900, gene44299:106583079	0.0325
278	CC	GO:0033162	melanosome membrane	gene47850:106586618	0.0328
279	CC	GO:0045009	chitosome	gene47850:106586618	0.0328
280	CC	GO:0001917	photoreceptor inner segment	gene1100:106604996, gene26964:106566029, gene34008:106572869	0.0331
281	CC	GO:0042734	presynaptic membrane	gene12163:106605512, gene14257:106607467, gene36296:106575175, gene44299:106583079	0.0342
282	CC	GO:0070161	anchoring junction	gene14239:106607477, gene14257:106607467, gene15093:106608273, gene18339:106611380, gene22974:106562111, gene24198:106563184, gene33543:106572414, gene34008:106572869, gene36296:106575175, gene41906:106580757, gene42294:106581151, gene43271:106582091, gene43968:106582810, gene43983:106582826, gene44888:106583691, gene497:106589077, gene6399:106599387, gene7265:106600850	0.0354
283	CC	GO:0042622	photoreceptor outer segment membrane	gene1100:106604996, gene44651:106583488	0.0362
284	CC	GO:0030659	cytoplasmic vesicle membrane	gene12163:106605512, gene17920:106611031, gene21390:106560584, gene22400:100136366, gene24198:106563184, gene30598:106569487, gene35582:106574544, gene40238:106579272, gene43271:106582091, gene43924:106582757, gene47850:106586618, gene48247:106587027	0.0374
285	CC	GO:0044433	cytoplasmic vesicle part	gene12163:106605512, gene17920:106611031, gene21390:106560584, gene22400:100136366, gene24198:106563184, gene30598:106569487, gene32862:100380418, gene35582:106574544, gene40238:106579272, gene43271:106582091, gene43924:106582757, gene47850:106586618, gene48247:106587027	0.0375
286	CC	GO:0016604	nuclear body	gene10188:106603639, gene12283:106605616, gene13721:106606950, gene13950:106607162, gene18566:106611581, gene23183:106562338, gene28770:106567727, gene36040:106574970, gene44237:106583131, gene45630:106584368, gene7609:106601241	0.0384
287	CC	GO:0043197	dendritic spine	gene11900:100136378, gene14213:106607496, gene18566:106611581, gene34008:106572869, gene4157:106582110, gene44423:106583303, gene7293:106600825	0.0398
288	CC	GO:0098794	postsynapse	gene11900:100136378, gene14213:106607496, gene14239:106607477, gene18566:106611581, gene34008:106572869, gene34605:106573471, gene40238:106579272, gene4157:106582110, gene41906:106580757, gene44299:106583079, gene44423:106583303, gene7265:106600850, gene7293:106600825	0.0398
289	CC	GO:0098590	plasma membrane region	gene1100:106604996, gene12163:106605512, gene14257:106607467, gene18566:106611581, gene18767:106611738, gene21390:106560584, gene22400:100136366, gene22974:106562111, gene23086:106562250, gene23207:100136926, gene25538:106564658, gene30598:106569487, gene32862:100380418, gene33543:106572414, gene34009:106572868, gene34605:106573471, gene35582:106574544, gene36296:106575175, gene3889:106579025, ge…	0.0455
290	CC	GO:0031205	endoplasmic reticulum Sec complex	gene22400:100136366	0.0457
291	CC	GO:0042995	cell projection	gene1100:106604996, gene11900:100136378, gene14213:106607496, gene14239:106607477, gene14257:106607467, gene18047:106611136, gene18566:106611581, gene18957:106611923, gene19306:106612291, gene23207:100136926, gene2377:106564765, gene24057:106563294, gene24198:106563184, gene25538:106564658, gene26209:106565346, gene26964:106566029, gene27580:106566494, gene28033:106566773, gene2866:106569712, gen…	0.0459
292	CC	GO:0044309	neuron spine	gene11900:100136378, gene14213:106607496, gene18566:106611581, gene34008:106572869, gene4157:106582110, gene44423:106583303, gene7293:106600825	0.0465

## Sheet: T4_SP_GO
X1	Category	ID	Term	Genes	adj_pval
1	MF	GO:0003700	transcription factor activity, sequence-...	gene10188:106603639, gene10316:106603784, gene10377:100846970, gene10527:100136800, gene10745:106604170, gene11332:106604687, gene11386:106604738, gene11900:100136378, gene11932:106605293, gene12283:106605616, gene12423:106605774, gene12426:106605776, gene12480:106605829, gene12936:106606295, gene12941:106606293, gene12942:106606296, gene1306:106607506, gene13088:106606447, gene13721:106606950, g…	2e-20
2	MF	GO:0000977	RNA polymerase II regulatory region sequ...	gene10188:106603639, gene10316:106603784, gene10377:100846970, gene10527:100136800, gene11386:106604738, gene11900:100136378, gene12283:106605616, gene12426:106605776, gene1306:106607506, gene13721:106606950, gene13759:106606985, gene13819:106607038, gene13852:106607080, gene13950:106607162, gene14213:106607496, gene15127:106608314, gene16077:106609245, gene16999:106610125, gene17014:106610112, g…	5.1e-14
3	MF	GO:0001046	core promoter sequence-specific DNA bind...	gene11386:106604738, gene11900:100136378, gene13852:106607080, gene14213:106607496, gene20852:106613816, gene22999:106562092, gene23340:106562490, gene24878:106564008, gene24908:106564038, gene25337:106564484, gene25340:106564486, gene25380:106564531, gene26276:106565395, gene26566:106565694, gene28170:106567064, gene29145:106567770, gene30016:106568924, gene32945:106571833, gene35149:106574039, …	1.7e-06
4	MF	GO:0004930	G-protein coupled receptor activity	gene10642:106604073, gene10970:106604332, gene11572:106604929, gene11695:106605056, gene13172:106606520, gene13469:106606823, gene13767:106606991, gene14486:106607709, gene16874:106609958, gene19567:106612694, gene20449:106613437, gene20852:106613816, gene2175:106562568, gene21752:100136415, gene22874:106562067, gene239:106562016, gene26341:106565450, gene26498:106565668, gene26770:106565734, gen…	2.6e-06
5	MF	GO:0003714	transcription corepressor activity	gene10664:106604092, gene11386:106604738, gene11900:100136378, gene11932:106605293, gene12172:106605519, gene12283:106605616, gene13088:106606447, gene13726:106606946, gene13819:106607038, gene13852:106607080, gene13869:106607101, gene13951:106607161, gene14213:106607496, gene14431:100195308, gene14634:106607818, gene15127:106608314, gene15496:106608687, gene17315:106610378, gene18944:106611936, …	7.5e-06
6	MF	GO:0001078	transcriptional repressor activity, RNA ...	gene10527:100136800, gene11900:100136378, gene13088:106606447, gene13852:106607080, gene13951:106607161, gene14213:106607496, gene14776:106607967, gene15127:106608314, gene16077:106609245, gene20799:106613773, gene21752:100136415, gene22999:106562092, gene2377:106564765, gene24131:106563235, gene25326:106564473, gene25380:106564531, gene26984:106566008, gene28170:106567064, gene30708:106569597, g…	8.1e-06
7	MF	GO:0043565	sequence-specific DNA binding	gene10188:106603639, gene10316:106603784, gene10377:100846970, gene10527:100136800, gene11386:106604738, gene11742:106605100, gene11900:100136378, gene11932:106605293, gene1198:106606339, gene12283:106605616, gene12426:106605776, gene1306:106607506, gene13721:106606950, gene13759:106606985, gene13797:106607055, gene13819:106607038, gene13852:106607080, gene13950:106607162, gene14213:106607496, ge…	5.9e-05
8	MF	GO:0016493	C-C chemokine receptor activity	gene29763:100195489, gene30573:106569491, gene35151:106574083, gene3951:106579844, gene3952:106579851, gene42905:106581841, gene47375:100306754, gene5779:106597311, gene6708:106600212	6e-05
9	MF	GO:0016494	C-X-C chemokine receptor activity	gene29763:100195489, gene30573:106569491, gene36719:106575635, gene42843:106581661, gene42905:106581841, gene47375:100306754, gene5779:106597311, gene6708:106600212	7.6e-05
10	MF	GO:0004879	RNA polymerase II transcription factor a...	gene11900:100136378, gene11932:106605293, gene14213:106607496, gene20852:106613816, gene21752:100136415, gene26294:106565406, gene27891:106566896, gene28170:106567064, gene32676:106571477, gene4157:106582110, gene41882:106580735, gene43593:100136911, gene44423:106583303, gene44664:100136532, gene46613:100196040, gene47528:100136407, gene50244:106588668, gene51815:106590294, gene6246:106599103, ge…	0.00012
11	MF	GO:0003705	transcription factor activity, RNA polym...	gene10188:106603639, gene12283:106605616, gene13088:106606447, gene13819:106607038, gene16958:106610047, gene16976:106610117, gene17040:106610132, gene20799:106613773, gene21199:106560371, gene22999:106562092, gene24131:106563235, gene25364:106564514, gene26276:106565395, gene26566:106565694, gene28336:100194884, gene28770:106567727, gene30398:100196464, gene33633:106572480, gene34887:106573587, …	0.00013
12	MF	GO:0005328	neurotransmitter:sodium symporter activi...	gene12169:106605517, gene27233:106566182, gene27580:106566494, gene33022:106571856, gene3906:106579373, gene44917:100194771, gene45776:106584498, gene48808:106587573, gene8475:106602109	0.00016
13	MF	GO:0001013	RNA polymerase I regulatory region DNA b...	gene28336:100194884, gene30398:100196464, gene33633:106572480, gene6556:106599802	0.00065
14	MF	GO:0042826	histone deacetylase binding	gene19475:106612460, gene1951:106560445, gene21822:106560921, gene24878:106564008, gene24908:106564038, gene25337:106564484, gene25340:106564486, gene28336:100194884, gene30016:106568924, gene30314:106569201, gene30398:100196464, gene31634:106570503, gene320:106570052, gene32945:106571833, gene33633:106572480, gene34251:100306852, gene34384:106573190, gene34733:106573732, gene34887:106573587, gen…	0.00069
15	MF	GO:0017098	sulfonylurea receptor binding	gene14920:106608137, gene21673:106561047, gene32862:100380418, gene32863:106571588	0.00112
16	MF	GO:0020037	heme binding	gene10486:106603932, gene1080:106604807, gene10944:106604295, gene11414:106604810, gene11900:100136378, gene14213:106607496, gene15126:106608296, gene23207:100136926, gene28170:106567064, gene37891:106576803, gene4157:106582110, gene44393:106583179, gene44423:106583303, gene45218:106583970, gene45307:106584062, gene48784:100136916, gene4980:106590030, gene5016:106590330, gene50244:106588668, gene…	0.00143
17	MF	GO:0005332	gamma-aminobutyric acid:sodium symporter...	gene27233:106566182, gene27580:106566494, gene33022:106571856, gene44917:100194771, gene45776:106584498	0.00165
18	MF	GO:0001222	transcription corepressor binding	gene11900:100136378, gene14213:106607496, gene20852:106613816, gene28170:106567064, gene4157:106582110, gene42867:106581867, gene44423:106583303, gene50244:106588668, gene6759:106600026	0.00179
19	MF	GO:0097027	ubiquitin-protein transferase activator ...	gene13726:106606946, gene25631:106564949, gene29753:106568664, gene39479:106578384, gene4609:106588430, gene52078:100380496, gene53914:106591915	0.00202
20	MF	GO:0023026	MHC class II protein complex binding	gene14920:106608137, gene19986:106613013, gene22961:100195460, gene32862:100380418, gene32863:106571588, gene34008:106572869, gene34144:106572998, gene42304:100286711	0.00251
21	MF	GO:0015175	neutral amino acid transmembrane transpo...	gene11330:106604686, gene12169:106605517, gene15708:106608835, gene24289:106563501, gene27233:106566182, gene33022:106571856, gene38905:106577803, gene3906:106579373, gene44917:100194771, gene48638:106587403, gene48808:106587573	0.00275
22	MF	GO:0030235	nitric-oxide synthase regulator activity	gene14303:106607436, gene14920:106608137, gene30455:106569312, gene32862:100380418, gene32863:106571588, gene41551:106580428, gene42253:106581181, gene45860:106584599, gene47677:106586446	0.00315
23	MF	GO:0003677	DNA binding	gene10079:106603496, gene10188:106603639, gene10316:106603784, gene10377:100846970, gene10527:100136800, gene10664:106604092, gene10735:106604162, gene10828:106604185, gene11348:106604804, gene11386:106604738, gene11742:106605100, gene11900:100136378, gene11932:106605293, gene1198:106606339, gene12283:106605616, gene12423:106605774, gene12426:106605776, gene12480:106605829, gene12941:106606293, g…	0.0032
24	MF	GO:0030977	taurine binding	gene27233:106566182, gene33022:106571856, gene44917:100194771	0.0034
25	MF	GO:0071791	chemokine (C-C motif) ligand 5 binding	gene35151:106574083, gene3951:106579844, gene3952:106579851	0.0034
26	MF	GO:0002135	CTP binding	gene14920:106608137, gene32862:100380418, gene32863:106571588	0.0034
27	MF	GO:0015293	symporter activity	gene12169:106605517, gene16405:106609517, gene16406:106609518, gene24359:106563433, gene26949:106566040, gene27233:106566182, gene27580:106566494, gene28200:106567082, gene2979:100136908, gene30307:106569207, gene32438:100194525, gene32915:106571769, gene33022:106571856, gene37490:100306766, gene37492:106576408, gene3906:106579373, gene39060:106577937, gene43251:106582107, gene43895:106582726, ge…	0.0036
28	MF	GO:0015171	amino acid transmembrane transporter act...	gene11330:106604686, gene12169:106605517, gene15708:106608835, gene16405:106609517, gene16406:106609518, gene24289:106563501, gene26949:106566040, gene27233:106566182, gene27580:106566494, gene33022:106571856, gene37490:100306766, gene37492:106576408, gene38905:106577803, gene3906:106579373, gene43895:106582726, gene44917:100194771, gene45776:106584498, gene46824:106585395, gene48638:106587403, g…	0.00392
29	MF	GO:0008134	transcription factor binding	gene10079:106603496, gene10527:100136800, gene10664:106604092, gene10703:106604126, gene10745:106604170, gene11900:100136378, gene12423:106605774, gene12471:106605818, gene1306:106607506, gene13088:106606447, gene13721:106606950, gene13819:106607038, gene13950:106607162, gene13951:106607161, gene13954:106607159, gene14093:106607320, gene14213:106607496, gene14431:100195308, gene14634:106607818, g…	0.00464
30	MF	GO:0055131	C3HC4-type RING finger domain binding	gene19986:106613013, gene34008:106572869, gene42304:100286711, gene42916:106581833, gene47388:106586155, gene7385:106601018	0.00468
31	MF	GO:0072349	modified amino acid transmembrane transp...	gene11051:106604362, gene11330:106604686, gene24359:106563433, gene27580:106566494, gene46824:106585395, gene51256:100380841	0.00468
32	MF	GO:0031072	heat shock protein binding	gene1047:106604528, gene14920:106608137, gene18991:106611988, gene19986:106613013, gene20064:106612954, gene21673:106561047, gene25124:106564265, gene26209:106565346, gene2866:106569712, gene29145:106567770, gene31664:106570526, gene32863:106571588, gene34008:106572869, gene37205:106576108, gene39631:106578540, gene40889:106579776, gene41917:106580765, gene42304:100286711, gene43593:100136911, ge…	0.0052
33	MF	GO:0015272	ATP-activated inward rectifier potassium...	gene21673:106561047, gene28816:106567683, gene42360:106581096	0.00569
34	MF	GO:0030911	TPR domain binding	gene14920:106608137, gene29052:106567843, gene32862:100380418, gene32863:106571588, gene9916:106603240	0.00604
35	MF	GO:0000978	RNA polymerase II core promoter proximal...	gene10377:100846970, gene10527:100136800, gene11900:100136378, gene13721:106606950, gene13819:106607038, gene13950:106607162, gene14213:106607496, gene15127:106608314, gene16077:106609245, gene20799:106613773, gene21752:100136415, gene22138:106561307, gene22999:106562092, gene2304:106563948, gene2377:106564765, gene24131:106563235, gene24845:106563978, gene25326:106564473, gene25364:106564514, ge…	0.00647
36	MF	GO:0003707	steroid hormone receptor activity	gene11900:100136378, gene11932:106605293, gene14213:106607496, gene21752:100136415, gene27891:106566896, gene32676:106571477, gene4157:106582110, gene41882:106580735, gene44423:106583303, gene44664:100136532, gene46613:100196040, gene50190:106588616, gene50244:106588668, gene6246:106599103	0.00668
37	MF	GO:0036122	BMP binding	gene12239:100194549, gene14147:106607269, gene32253:106571103, gene3448:106574976, gene7367:106601000	0.00745
38	MF	GO:0000976	transcription regulatory region sequence...	gene10188:106603639, gene10316:106603784, gene10377:100846970, gene10527:100136800, gene11386:106604738, gene11900:100136378, gene12283:106605616, gene12426:106605776, gene1306:106607506, gene13721:106606950, gene13759:106606985, gene13819:106607038, gene13852:106607080, gene13950:106607162, gene14213:106607496, gene15127:106608314, gene16077:106609245, gene16788:106609879, gene16999:106610125, g…	0.00762
39	MF	GO:0008528	G-protein coupled peptide receptor activ...	gene11695:106605056, gene13172:106606520, gene16874:106609958, gene26341:106565450, gene29528:106568449, gene29763:100195489, gene30573:106569491, gene31261:106569878, gene32078:106570940, gene34732:106573807, gene35151:106574083, gene36719:106575635, gene36810:106575713, gene37205:106576108, gene39308:106578207, gene3951:106579844, gene3952:106579851, gene40309:106579376, gene42843:106581661, ge…	0.00777
40	MF	GO:0001077	transcriptional activator activity, RNA ...	gene10377:100846970, gene10527:100136800, gene12423:106605774, gene13721:106606950, gene13819:106607038, gene13950:106607162, gene15127:106608314, gene20799:106613773, gene21752:100136415, gene22138:106561307, gene22999:106562092, gene2304:106563948, gene24131:106563235, gene24845:106563978, gene25364:106564514, gene26276:106565395, gene26294:106565406, gene26566:106565694, gene26810:106565962, g…	0.00792
41	MF	GO:0017129	triglyceride binding	gene20716:106613695, gene21903:106560849, gene34930:106573544	0.00871
42	MF	GO:0032564	dATP binding	gene14920:106608137, gene32862:100380418, gene32863:106571588	0.00871
43	MF	GO:0070080	titin Z domain binding	gene12239:100194549, gene14147:106607269, gene7367:106601000	0.00871
44	MF	GO:0001190	transcriptional activator activity, RNA ...	gene10527:100136800, gene13819:106607038, gene14634:106607818, gene21752:100136415, gene22237:106561392, gene23046:106562219, gene26276:106565395, gene27348:106566301, gene27411:106566360, gene28638:106567530, gene29145:106567770, gene33738:106572630, gene34887:106573587, gene36143:106575067, gene39631:106578540, gene44664:100136532, gene45005:106583767, gene45510:106584280, gene45653:106584385, …	0.00954
45	MF	GO:0004953	icosanoid receptor activity	gene21752:100136415, gene239:106562016, gene2772:106568685, gene30528:106569372, gene39138:106578013, gene44664:100136532, gene4910:106589359, gene981:106602991	0.01076
46	MF	GO:0086008	voltage-gated potassium channel activity...	gene18049:106611134, gene1833:106611887, gene42916:106581833, gene47388:106586155	0.01164
47	MF	GO:0042562	hormone binding	gene21338:106560529, gene21411:106560567, gene26045:106565194, gene29483:106568389, gene29528:106568449, gene30455:106569312, gene31261:106569878, gene32078:106570940, gene39308:106578207, gene40309:106579376, gene41770:100196588, gene41882:106580735, gene44744:106583415, gene47436:106586206, gene47677:106586446, gene51140:100286546, gene57709:106592319, gene9857:100380342	0.0117
48	MF	GO:0031420	alkali metal ion binding	gene21673:106561047, gene22961:100195460, gene28816:106567683, gene42360:106581096, gene42867:106581867, gene47425:106586196, gene47521:106586273, gene51882:101448068	0.012
49	MF	GO:0000099	sulfur amino acid transmembrane transpor...	gene11330:106604686, gene48638:106587403, gene51256:100380841	0.01251
50	MF	GO:0035717	chemokine (C-C motif) ligand 7 binding	gene35151:106574083, gene3951:106579844, gene3952:106579851	0.01251
51	MF	GO:0005049	nuclear export signal receptor activity	gene59949:106594802, gene62277:106594362, gene70675:106594820	0.01251
52	MF	GO:1901682	sulfur compound transmembrane transporte...	gene11330:106604686, gene16260:106609368, gene26117:106565132, gene27233:106566182, gene33022:106571856, gene44917:100194771, gene48638:106587403, gene51256:100380841	0.01335
53	MF	GO:0008144	drug binding	gene10858:106604209, gene10970:106604332, gene14486:106607709, gene15897:106608992, gene18040:106610930, gene21752:100136415, gene26209:106565346, gene29052:106567843, gene30573:106569491, gene3889:106579025, gene40889:106579776, gene41235:106579965, gene42905:106581841, gene44582:100196052, gene44664:100136532, gene45278:106584037, gene46592:106585604, gene47375:100306754, gene47521:106586273, g…	0.01401
54	MF	GO:0016712	oxidoreductase activity, acting on paire...	gene1080:106604807, gene23207:100136926, gene37891:106576803, gene45307:106584062, gene48784:100136916	0.01537
55	MF	GO:0032027	myosin light chain binding	gene30373:106569150, gene30573:106569491, gene42905:106581841, gene45350:106584199, gene47375:100306754, gene6708:106600212	0.01632
56	MF	GO:0031681	G-protein beta-subunit binding	gene40143:106579016, gene47264:106586018, gene47278:106586030, gene47279:106586032, gene50825:106589334, gene9637:100195688	0.01632
57	MF	GO:0051373	FATZ binding	gene12239:100194549, gene14147:106607269, gene7367:106601000	0.01711
58	MF	GO:0002134	UTP binding	gene14920:106608137, gene32862:100380418, gene32863:106571588	0.01711
59	MF	GO:0043733	DNA-3-methylbase glycosylase activity	gene10828:106604185, gene14024:106607370, gene7495:106601084	0.01711
60	MF	GO:0004620	phospholipase activity	gene14878:106608063, gene17210:106610304, gene20716:106613695, gene29528:106568449, gene34930:106573544, gene35151:106574083, gene35434:106574281, gene35450:106574372, gene39308:106578207, gene3951:106579844, gene3952:106579851, gene43885:106582617, gene4980:106590030, gene5016:106590330, gene6607:106600430, gene725:106601609, gene8707:106602299	0.018
61	MF	GO:0031701	angiotensin receptor binding	gene20229:106613218, gene35242:106574143, gene39308:106578207, gene51222:100195417, gene56763:106595050, gene9637:100195688	0.01855
62	MF	GO:0035591	signaling adaptor activity	gene15601:106608778, gene15974:106609060, gene17148:100380732, gene19078:106612062, gene20721:106613697, gene20824:106613792, gene20826:100196527, gene21338:106560529, gene23906:106563047, gene2441:106565324, gene28441:106567289, gene29994:106568943, gene33265:106572187, gene33594:106572443, gene36328:106575249, gene37138:106576039, gene37273:106576177, gene42955:106581801, gene47002:106585786, g…	0.02053
63	MF	GO:0045505	dynein intermediate chain binding	gene14303:106607436, gene19554:106612708, gene41551:106580428, gene42253:106581181, gene8475:106602109	0.02088
64	MF	GO:0019958	C-X-C chemokine binding	gene26341:106565450, gene29763:100195489, gene36719:106575635, gene42843:106581661, gene5779:106597311	0.02088
65	MF	GO:0071949	FAD binding	gene18276:106611320, gene25405:106564551, gene34352:106573205, gene44651:106583488, gene48537:106587193, gene52147:106590608	0.02098
66	MF	GO:0000981	RNA polymerase II transcription factor a...	gene10188:106603639, gene10377:100846970, gene10527:100136800, gene11900:100136378, gene11932:106605293, gene12283:106605616, gene12423:106605774, gene12426:106605776, gene1306:106607506, gene13088:106606447, gene13721:106606950, gene13819:106607038, gene13852:106607080, gene13950:106607162, gene13951:106607161, gene14213:106607496, gene14257:106607467, gene14776:106607967, gene1493:106609599, ge…	0.02157
67	MF	GO:0008140	cAMP response element binding protein bi...	gene19475:106612460, gene21822:106560921, gene35036:106573895, gene3950:106579830, gene39631:106578540, gene44398:106583174, gene50303:106588784	0.02197
68	MF	GO:0035827	rubidium ion transmembrane transporter a...	gene2979:100136908, gene30307:106569207, gene39060:106577937	0.02253
69	MF	GO:0001102	RNA polymerase II activating transcripti...	gene10079:106603496, gene10527:100136800, gene13088:106606447, gene13819:106607038, gene14634:106607818, gene22237:106561392, gene23183:106562338, gene23243:106562395, gene36143:106575067, gene39631:106578540, gene41366:106579855, gene42948:106581806, gene44398:106583174, gene45005:106583767, gene45510:106584280	0.02357
70	MF	GO:0042165	neurotransmitter binding	gene27233:106566182, gene27580:106566494, gene33022:106571856, gene44917:100194771, gene45776:106584498, gene48502:106587222	0.02362
71	MF	GO:0005159	insulin-like growth factor receptor bind...	gene15601:106608778, gene15977:106609064, gene20824:106613792, gene21338:106560529, gene21411:106560567, gene26826:106565979, gene28441:106567289, gene37273:106576177	0.02387
72	MF	GO:0045125	bioactive lipid receptor activity	gene13767:106606991, gene20449:106613437, gene29553:106568491, gene3141:106572527	0.02578
73	MF	GO:0030955	potassium ion binding	gene21673:106561047, gene22961:100195460, gene28816:106567683, gene42360:106581096, gene42867:106581867, gene47521:106586273	0.02647
74	MF	GO:0004435	phosphatidylinositol phospholipase C act...	gene14878:106608063, gene29528:106568449, gene35151:106574083, gene35434:106574281, gene39308:106578207, gene3951:106579844, gene3952:106579851	0.02682
75	MF	GO:0001085	RNA polymerase II transcription factor b...	gene10079:106603496, gene10527:100136800, gene13088:106606447, gene13819:106607038, gene14634:106607818, gene17911:106611037, gene21752:100136415, gene22237:106561392, gene22767:100196456, gene22999:106562092, gene2304:106563948, gene23183:106562338, gene23243:106562395, gene24131:106563235, gene30016:106568924, gene31164:106569978, gene320:106570052, gene33738:106572630, gene34887:106573587, gen…	0.02683
76	MF	GO:0031994	insulin-like growth factor I binding	gene21210:101448057, gene21411:106560567, gene28193:101448061, gene33675:106572511, gene4678:100194498	0.02753
77	MF	GO:0004874	aryl hydrocarbon receptor activity	gene43593:100136911, gene47528:100136407, gene51815:106590294	0.02877
78	MF	GO:0008081	phosphoric diester hydrolase activity	gene10012:106603555, gene14878:106608063, gene29052:106567843, gene29528:106568449, gene35151:106574083, gene35434:106574281, gene39308:106578207, gene3951:106579844, gene3952:106579851, gene43038:106581900, gene43885:106582617, gene45278:106584037, gene4980:106590030, gene5016:106590330, gene9916:106603240	0.02912
79	MF	GO:0001223	transcription coactivator binding	gene20852:106613816, gene21752:100136415, gene41882:106580735, gene44664:100136532, gene48856:106587624, gene6759:106600026	0.02954
80	MF	GO:0004994	somatostatin receptor activity	gene13172:106606520, gene825:106602103	0.02981
81	MF	GO:0004962	endothelin receptor activity	gene29528:106568449, gene39308:106578207	0.02981
82	MF	GO:0070915	lysophosphatidic acid receptor activity	gene20449:106613437, gene3141:106572527	0.02981
83	MF	GO:0035715	chemokine (C-C motif) ligand 2 binding	gene35151:106574083, gene3951:106579844	0.02981
84	MF	GO:0035716	chemokine (C-C motif) ligand 12 binding	gene35151:106574083, gene3951:106579844	0.02981
85	MF	GO:0030492	hemoglobin binding	gene47436:106586206, gene57709:106592319	0.02981
86	MF	GO:0005250	A-type (transient outward) potassium cha...	gene11497:106604868, gene2377:106564765	0.02981
87	MF	GO:0005313	L-glutamate transmembrane transporter ac...	gene11330:106604686, gene26949:106566040, gene43895:106582726, gene48638:106587403	0.03043
88	MF	GO:0030553	cGMP binding	gene11179:106604533, gene29052:106567843, gene50908:106589397, gene9916:106603240	0.03043
89	MF	GO:0031995	insulin-like growth factor II binding	gene21210:101448057, gene21411:106560567, gene28193:101448061, gene4678:100194498	0.03043
90	MF	GO:0005158	insulin receptor binding	gene14047:106607353, gene14239:106607477, gene15601:106608778, gene15977:106609064, gene20824:106613792, gene21338:106560529, gene21411:106560567, gene33265:106572187, gene33594:106572443, gene38743:106577623, gene42955:106581801, gene7265:106600850	0.03065
91	MF	GO:0004954	prostanoid receptor activity	gene21752:100136415, gene2772:106568685, gene44664:100136532, gene4910:106589359, gene981:106602991	0.03131
92	MF	GO:0004955	prostaglandin receptor activity	gene21752:100136415, gene2772:106568685, gene44664:100136532, gene4910:106589359, gene981:106602991	0.03131
93	MF	GO:0001227	transcriptional repressor activity, RNA ...	gene10188:106603639, gene10527:100136800, gene11900:100136378, gene12283:106605616, gene1306:106607506, gene13088:106606447, gene13852:106607080, gene13951:106607161, gene14213:106607496, gene14776:106607967, gene15127:106608314, gene16077:106609245, gene17014:106610112, gene19688:106612521, gene20799:106613773, gene21752:100136415, gene22999:106562092, gene2377:106564765, gene24131:106563235, ge…	0.03553
94	MF	GO:0046790	virion binding	gene14920:106608137, gene22237:106561392, gene32863:106571588, gene45005:106583767	0.03553
95	MF	GO:0051959	dynein light intermediate chain binding	gene14303:106607436, gene41551:106580428, gene42253:106581181	0.03583
96	MF	GO:0015271	outward rectifier potassium channel acti...	gene11497:106604868, gene18049:106611134, gene2377:106564765	0.03583
97	MF	GO:0016298	lipase activity	gene14878:106608063, gene17210:106610304, gene20716:106613695, gene29528:106568449, gene34930:106573544, gene35151:106574083, gene35434:106574281, gene35450:106574372, gene39308:106578207, gene3951:106579844, gene3952:106579851, gene43885:106582617, gene48669:106587376, gene4980:106590030, gene5016:106590330, gene6607:106600430, gene725:106601609, gene8707:106602299	0.03764
98	MF	GO:0051879	Hsp90 protein binding	gene14920:106608137, gene18991:106611988, gene20064:106612954, gene2866:106569712, gene29145:106567770, gene32863:106571588, gene40889:106579776, gene41917:106580765, gene43593:100136911, gene47528:100136407, gene51815:106590294, gene80:106599806	0.03862
99	MF	GO:0005070	SH3/SH2 adaptor activity	gene15974:106609060, gene17148:100380732, gene19078:106612062, gene20721:106613697, gene20826:100196527, gene2441:106565324, gene28441:106567289, gene33265:106572187, gene33594:106572443, gene36328:106575249, gene37138:106576039, gene37273:106576177, gene42955:106581801, gene57355:106592182, gene8093:106601729	0.03917
100	MF	GO:0001664	G-protein coupled receptor binding	gene10487:106603933, gene10970:106604332, gene11179:106604533, gene15897:106608992, gene19986:106613013, gene20229:106613218, gene22534:106561692, gene22776:100136362, gene23866:106563080, gene23906:106563047, gene2424:106565855, gene2609:106566303, gene2731:106568345, gene27730:106566645, gene29553:106568491, gene29994:106568943, gene31303:106569856, gene31433:106570295, gene32021:100196070, gen…	0.03973
101	MF	GO:0019956	chemokine binding	gene19537:106612723, gene26341:106565450, gene29763:100195489, gene35151:106574083, gene36719:106575635, gene3951:106579844, gene3952:106579851, gene42843:106581661, gene5779:106597311	0.0398
102	MF	GO:0042813	Wnt-activated receptor activity	gene28784:106567714, gene30132:106568833, gene31303:106569856, gene39628:106578536, gene42040:106580877, gene47436:106586206	0.04011
103	MF	GO:0035035	histone acetyltransferase binding	gene13721:106606950, gene13950:106607162, gene14634:106607818, gene20799:106613773, gene28336:100194884, gene31634:106570503, gene3292:106573644, gene33633:106572480, gene34887:106573587, gene39631:106578540, gene71293:106594275, gene7609:106601241	0.04083
104	MF	GO:0016831	carboxy-lyase activity	gene14632:106607817, gene18047:106611136, gene21876:106560874, gene30622:106569508, gene42918:106581832, gene51857:106590260, gene61616:106594092	0.04198
105	MF	GO:0004629	phospholipase C activity	gene14878:106608063, gene29528:106568449, gene35151:106574083, gene35434:106574281, gene39308:106578207, gene3951:106579844, gene3952:106579851, gene43885:106582617	0.0422
106	MF	GO:0033188	sphingomyelin synthase activity	gene38124:106577006, gene39327:106578226	0.04302
107	MF	GO:0005365	myo-inositol transmembrane transporter a...	gene43251:106582107, gene47866:106586629	0.04302
108	MF	GO:0031403	lithium ion binding	gene47521:106586273, gene51882:101448068	0.04302
109	MF	GO:0016501	prostacyclin receptor activity	gene21752:100136415, gene44664:100136532	0.04302
110	MF	GO:0001632	leukotriene B4 receptor activity	gene30528:106569372, gene39138:106578013	0.04302
111	MF	GO:0008267	poly-glutamine tract binding	gene27348:106566301, gene27411:106566360	0.04302
112	MF	GO:0036004	GAF domain binding	gene29052:106567843, gene9916:106603240	0.04302
113	MF	GO:0047493	ceramide cholinephosphotransferase activ...	gene38124:106577006, gene39327:106578226	0.04302
114	MF	GO:0004706	JUN kinase kinase kinase activity	gene15496:106608687, gene3025:106571505, gene51229:106589668	0.04368
115	MF	GO:0004676	3-phosphoinositide-dependent protein kin...	gene14047:106607353, gene14239:106607477, gene7265:106600850	0.04368
116	MF	GO:0031702	type 1 angiotensin receptor binding	gene20229:106613218, gene35242:106574143, gene39308:106578207, gene56763:106595050, gene9637:100195688	0.04452
117	MF	GO:0017046	peptide hormone binding	gene21338:106560529, gene21411:106560567, gene26045:106565194, gene29528:106568449, gene31261:106569878, gene32078:106570940, gene39308:106578207, gene40309:106579376, gene41770:100196588, gene44744:106583415, gene9857:100380342	0.0457
118	MF	GO:0005388	calcium-transporting ATPase activity	gene10487:106603933, gene2609:106566303, gene45860:106584599, gene60513:106592954	0.04714
119	MF	GO:0071535	RING-like zinc finger domain binding	gene25631:106564949, gene29753:106568664, gene39479:106578384, gene52078:100380496	0.04714
120	BP	GO:0000122	negative regulation of transcription fro...	gene10079:106603496, gene10188:106603639, gene10424:106603870, gene10527:100136800, gene10664:106604092, gene10745:106604170, gene11386:106604738, gene11900:100136378, gene11932:106605293, gene1198:106606339, gene12283:106605616, gene1267:106608700, gene1306:106607506, gene13088:106606447, gene13726:106606946, gene13819:106607038, gene13852:106607080, gene13869:106607101, gene13951:106607161, gen…	1e-13
121	BP	GO:0002437	inflammatory response to antigenic stimu...	gene10316:106603784, gene12941:106606293, gene12942:106606296, gene14486:106607709, gene24878:106564008, gene24921:106564056, gene24923:106564050, gene25254:106564402, gene25257:106564400, gene25337:106564484, gene25338:106564487, gene25407:106564555, gene29763:100195489, gene34963:106573838, gene35151:106574083, gene36430:106575349, gene36719:106575635, gene38061:106576952, gene3951:106579844, g…	5.4e-11
122	BP	GO:0045629	negative regulation of T-helper 2 cell d...	gene10316:106603784, gene12941:106606293, gene12942:106606296, gene24878:106564008, gene24921:106564056, gene24923:106564050, gene25254:106564402, gene25257:106564400, gene25337:106564484, gene25338:106564487, gene25407:106564555, gene34963:106573838, gene36430:106575349, gene39714:106578601, gene5095:106590997, gene52110:106590567, gene5437:106594023, gene54536:106591075, gene5526:106594941, gen…	6.6e-10
123	BP	GO:0045668	negative regulation of osteoblast differ...	gene11332:106604687, gene12172:106605519, gene13951:106607161, gene20852:106613816, gene22999:106562092, gene24878:106564008, gene24908:106564038, gene2715:106567959, gene30708:106569597, gene32945:106571833, gene35151:106574083, gene36507:106575424, gene37841:106576847, gene3903:106579350, gene3951:106579844, gene3952:106579851, gene40238:106579272, gene41518:106580481, gene41666:106580541, gene…	1.7e-09
124	BP	GO:0010729	positive regulation of hydrogen peroxide...	gene16957:106610049, gene16969:106610122, gene16999:106610125, gene17030:106610114, gene17038:106610119, gene17040:106610132, gene8865:106602403, gene8919:106602468, gene8934:106602500, gene8937:106602503, gene8939:106602502, gene8961:106602616	1.6e-07
125	BP	GO:0048769	sarcomerogenesis	gene12239:100194549, gene14147:106607269, gene14920:106608137, gene30373:106569150, gene32862:100380418, gene32863:106571588, gene45350:106584199, gene49260:106588037, gene7367:106601000	1.8e-06
126	BP	GO:0060086	circadian temperature homeostasis	gene11900:100136378, gene14213:106607496, gene20799:106613773, gene28170:106567064, gene4157:106582110, gene44423:106583303, gene50244:106588668, gene9574:106603045	1.9e-06
127	BP	GO:0071294	cellular response to zinc ion	gene16788:106609879, gene23370:106562514, gene24890:106564020, gene24921:106564056, gene25248:106564415, gene25257:106564400, gene25349:106564490, gene25407:106564555, gene32973:106571827, gene34963:106573838, gene36430:106575349, gene37043:106575958, gene39631:106578540, gene5517:106594902, gene5526:106594941, gene8891:106602461	5.1e-06
128	BP	GO:0043433	negative regulation of sequence-specific...	gene10664:106604092, gene1080:106604807, gene13088:106606447, gene15496:106608687, gene18163:106611226, gene19475:106612460, gene1951:106560445, gene21411:106560567, gene21822:106560921, gene22534:106561692, gene22874:106562067, gene23944:106563020, gene24131:106563235, gene24878:106564008, gene24908:106564038, gene25337:106564484, gene25340:106564486, gene25803:106564804, gene27572:106566482, ge…	9.3e-06
129	BP	GO:0003333	amino acid transmembrane transport	gene11330:106604686, gene12169:106605517, gene15708:106608835, gene16405:106609517, gene16406:106609518, gene26949:106566040, gene27233:106566182, gene27580:106566494, gene33022:106571856, gene37490:100306766, gene37492:106576408, gene38905:106577803, gene3906:106579373, gene43895:106582726, gene44917:100194771, gene45776:106584498, gene46824:106585395, gene48638:106587403, gene48808:106587573, g…	1e-05
130	BP	GO:0070859	positive regulation of bile acid biosynt...	gene11900:100136378, gene14213:106607496, gene28170:106567064, gene4157:106582110, gene44423:106583303, gene50244:106588668	4.6e-05
131	BP	GO:0032922	circadian regulation of gene expression	gene11332:106604687, gene11900:100136378, gene13088:106606447, gene14213:106607496, gene15578:106608616, gene18957:106611923, gene20852:106613816, gene21752:100136415, gene23340:106562490, gene24514:106563702, gene28170:106567064, gene28692:106567574, gene29145:106567770, gene30097:100301980, gene35151:106574083, gene38727:106577610, gene3951:106579844, gene3952:106579851, gene39631:106578540, ge…	6.5e-05
132	BP	GO:0035995	detection of muscle stretch	gene12239:100194549, gene14147:106607269, gene22767:100196456, gene49260:106588037, gene7367:106601000	6.8e-05
133	BP	GO:1901030	positive regulation of mitochondrial out...	gene14303:106607436, gene16957:106610049, gene16969:106610122, gene16999:106610125, gene17030:106610114, gene17038:106610119, gene17040:106610132, gene29128:106567782, gene31164:106569978, gene41551:106580428, gene42253:106581181, gene80:106599806, gene8865:106602403, gene8919:106602468, gene8934:106602500, gene8937:106602503, gene8939:106602502, gene8961:106602616	0.0002
134	BP	GO:0030240	skeletal muscle thin filament assembly	gene12239:100194549, gene14147:106607269, gene14920:106608137, gene32862:100380418, gene32863:106571588, gene49260:106588037, gene5623:106595815, gene7367:106601000	0.00024
135	BP	GO:0010871	negative regulation of receptor biosynth...	gene11900:100136378, gene14213:106607496, gene21752:100136415, gene28170:106567064, gene33675:106572511, gene4157:106582110, gene44423:106583303, gene44664:100136532, gene50244:106588668	0.00026
136	BP	GO:0021549	cerebellum development	gene10740:106604165, gene10852:100196483, gene13172:106606520, gene15578:106608616, gene15839:106608947, gene16077:106609245, gene18957:106611923, gene19554:106612708, gene19986:106613013, gene20064:106612954, gene20449:106613437, gene20852:106613816, gene25364:106564514, gene25631:106564949, gene27348:106566301, gene27411:106566360, gene28784:106567714, gene29753:106568664, gene3141:106572527, g…	0.0003
137	BP	GO:0032570	response to progesterone	gene1080:106604807, gene10970:106604332, gene12026:106605376, gene13767:106606991, gene13819:106607038, gene14920:106608137, gene19986:106613013, gene21338:106560529, gene22860:106562012, gene24245:106563397, gene2772:106568685, gene30455:106569312, gene32863:106571588, gene34008:106572869, gene37891:106576803, gene4034:100195405, gene42304:100286711, gene47521:106586273, gene47677:106586446, gen…	0.00031
138	BP	GO:0070886	positive regulation of calcineurin-NFAT ...	gene22701:106561865, gene27275:106566223, gene2979:100136908, gene41917:106580765, gene47677:106586446, gene47988:106586777, gene80:106599806	0.00032
139	BP	GO:0034144	negative regulation of toll-like recepto...	gene11900:100136378, gene14213:106607496, gene28170:106567064, gene4157:106582110, gene44423:106583303, gene47002:106585786, gene50244:106588668	0.00032
140	BP	GO:0035914	skeletal muscle cell differentiation	gene11900:100136378, gene12423:106605774, gene13721:106606950, gene13950:106607162, gene14213:106607496, gene14634:106607818, gene15443:106608552, gene17040:106610132, gene23183:106562338, gene23243:106562395, gene26276:106565395, gene26294:106565406, gene26325:106565435, gene27505:106566425, gene28170:106567064, gene30373:106569150, gene33829:106572673, gene41366:106579855, gene4157:106582110, g…	0.00034
141	BP	GO:0046697	decidualization	gene10944:106604295, gene13819:106607038, gene14634:106607818, gene15839:106608947, gene21752:100136415, gene27891:106566896, gene41882:106580735, gene44393:106583179, gene44664:100136532, gene45218:106583970, gene46612:106585585, gene7547:100195206, gene9833:100194921	0.00035
142	BP	GO:0009561	megagametogenesis	gene11783:106605134, gene27536:106566450, gene27776:106566761, gene29476:106568397, gene33585:106572434, gene40889:106579776, gene46186:106585245, gene59949:106594802, gene70675:106594820	0.00039
143	BP	GO:0035947	regulation of gluconeogenesis by regulat...	gene11900:100136378, gene14213:106607496, gene14776:106607967, gene28170:106567064, gene31634:106570503, gene34384:106573190, gene4157:106582110, gene44423:106583303, gene50244:106588668	0.00048
144	BP	GO:0040015	negative regulation of multicellular org...	gene10944:106604295, gene26826:106565979, gene28441:106567289, gene37273:106576177, gene41666:106580541, gene46592:106585604, gene4678:100194498, gene50908:106589397, gene7097:106600739	0.00058
145	BP	GO:0030241	skeletal muscle myosin thick filament as...	gene12239:100194549, gene14147:106607269, gene14920:106608137, gene32862:100380418, gene32863:106571588, gene37209:106576111, gene49260:106588037, gene7367:106601000	0.0006
146	BP	GO:0008407	chaeta morphogenesis	gene14303:106607436, gene24131:106563235, gene30132:106568833, gene31164:106569978, gene39628:106578536, gene41551:106580428, gene42253:106581181, gene4735:106587379, gene497:106589077, gene6148:106598913, gene77836:106592414	0.0007
147	BP	GO:0045909	positive regulation of vasodilation	gene10970:106604332, gene21752:100136415, gene239:106562016, gene30455:106569312, gene31634:106570503, gene44664:100136532, gene47264:106586018, gene47677:106586446, gene47876:106586638, gene4980:106590030, gene5016:106590330, gene50908:106589397, gene51900:106590348, gene981:106602991, gene9857:100380342	0.0008
148	BP	GO:0030815	negative regulation of cAMP metabolic pr...	gene18163:106611226, gene20449:106613437, gene29052:106567843, gene29528:106568449, gene31305:106569851, gene3141:106572527, gene32078:106570940, gene3922:106579439, gene39308:106578207, gene50190:106588616, gene816:106601984, gene825:106602103, gene9916:106603240	0.00086
149	BP	GO:0035701	hematopoietic stem cell migration	gene25631:106564949, gene29753:106568664, gene35151:106574083, gene39479:106578384, gene3951:106579844, gene52078:100380496	0.00097
150	BP	GO:0060137	maternal process involved in parturition	gene1080:106604807, gene2772:106568685, gene29528:106568449, gene37891:106576803, gene39308:106578207, gene50210:106588640	0.00097
151	BP	GO:0021503	neural fold bending	gene14467:106607691, gene17615:106610673, gene36729:106575647, gene43185:106582008	0.00113
152	BP	GO:0042026	protein refolding	gene14920:106608137, gene19986:106613013, gene25124:106564265, gene2866:106569712, gene32862:100380418, gene32863:106571588, gene34008:106572869, gene42304:100286711, gene5189:106591679, gene7092:106600736, gene7385:106601018	0.00121
153	BP	GO:0022603	regulation of anatomical structure morph...	gene10316:106603784, gene10500:106603948, gene10664:106604092, gene1080:106604807, gene10885:106604256, gene10970:106604332, gene11179:106604533, gene11413:106604757, gene12027:106605377, gene12172:106605519, gene1267:106608700, gene12942:106606296, gene12957:106606308, gene12981:106606328, gene13767:106606991, gene13951:106607161, gene14257:106607467, gene14351:106607561, gene14634:106607818, ge…	0.00125
154	BP	GO:0061469	regulation of type B pancreatic cell pro...	gene11900:100136378, gene14213:106607496, gene26294:106565406, gene28170:106567064, gene4157:106582110, gene44423:106583303, gene50244:106588668	0.00138
155	BP	GO:0010677	negative regulation of cellular carbohyd...	gene11572:106604929, gene15578:106608616, gene18957:106611923, gene19475:106612460, gene21752:100136415, gene21822:106560921, gene29744:106568655, gene31164:106569978, gene38292:106577211, gene38727:106577610, gene41894:100136356, gene42867:106581867, gene42955:106581801, gene43113:106581954, gene44664:100136532, gene46533:106585266, gene50303:106588784, gene50908:106589397	0.00139
156	BP	GO:0048662	negative regulation of smooth muscle cel...	gene15578:106608616, gene18957:106611923, gene21338:106560529, gene21752:100136415, gene31261:106569878, gene32078:106570940, gene38727:106577610, gene41882:106580735, gene44664:100136532, gene4980:106590030, gene5016:106590330, gene50696:106589124, gene981:106602991	0.00167
157	BP	GO:0071456	cellular response to hypoxia	gene10424:106603870, gene10944:106604295, gene10970:106604332, gene13721:106606950, gene13950:106607162, gene14239:106607477, gene14634:106607818, gene15443:106608552, gene15578:106608616, gene15839:106608947, gene17851:106610840, gene18163:106611226, gene18957:106611923, gene20852:106613816, gene21752:100136415, gene22237:106561392, gene28200:106567082, gene30432:106569334, gene35242:106574143, …	0.00171
158	BP	GO:2000505	regulation of energy homeostasis	gene11900:100136378, gene14213:106607496, gene15578:106608616, gene18957:106611923, gene28170:106567064, gene38727:106577610, gene4157:106582110, gene41770:100196588, gene44423:106583303, gene50244:106588668	0.00173
159	BP	GO:0072337	modified amino acid transport	gene11051:106604362, gene11330:106604686, gene16405:106609517, gene24359:106563433, gene27580:106566494, gene37490:100306766, gene37492:106576408, gene46824:106585395, gene51140:100286546, gene51256:100380841	0.00173
160	BP	GO:0045892	negative regulation of transcription, DN...	gene10079:106603496, gene10188:106603639, gene10316:106603784, gene10377:100846970, gene10424:106603870, gene10454:106603903, gene10527:100136800, gene10664:106604092, gene10745:106604170, gene1080:106604807, gene11386:106604738, gene11900:100136378, gene11932:106605293, gene1198:106606339, gene12172:106605519, gene12283:106605616, gene1267:106608700, gene1306:106607506, gene13088:106606447, gene…	0.00177
161	BP	GO:0071387	cellular response to cortisol stimulus	gene1080:106604807, gene37891:106576803, gene45653:106584385	0.00179
162	BP	GO:0018990	ecdysis, chitin-based cuticle	gene14213:106607496, gene4157:106582110, gene50244:106588668	0.00179
163	BP	GO:0051552	flavone metabolic process	gene15578:106608616, gene18957:106611923, gene38727:106577610, gene43113:106581954	0.0018
164	BP	GO:2000288	positive regulation of myoblast prolifer...	gene10527:100136800, gene21752:100136415, gene26276:106565395, gene44664:100136532	0.0018
165	BP	GO:0006954	inflammatory response	gene10117:106603470, gene10316:106603784, gene10970:106604332, gene11414:106604810, gene11900:100136378, gene12941:106606293, gene12942:106606296, gene13241:106606595, gene13767:106606991, gene14213:106607496, gene14486:106607709, gene15839:106608947, gene19537:106612723, gene19567:106612694, gene20852:106613816, gene21199:106560371, gene21564:106560790, gene21752:100136415, gene22974:106562111, …	0.00182
166	BP	GO:0051384	response to glucocorticoid	gene1080:106604807, gene10944:106604295, gene10970:106604332, gene12026:106605376, gene13172:106606520, gene13819:106607038, gene15443:106608552, gene15578:106608616, gene15839:106608947, gene16874:106609958, gene20824:106613792, gene21338:106560529, gene21411:106560567, gene22860:106562012, gene239:106562016, gene2494:106565903, gene26045:106565194, gene26325:106565435, gene28336:100194884, gene…	0.00184
167	BP	GO:0043153	entrainment of circadian clock by photop...	gene13088:106606447, gene14878:106608063, gene19475:106612460, gene20799:106613773, gene21822:106560921, gene24514:106563702, gene28692:106567574, gene30097:100301980, gene35036:106573895, gene41928:106580775, gene44651:106583488, gene50303:106588784, gene9574:106603045	0.00186
168	BP	GO:0033962	cytoplasmic mRNA processing body assembl...	gene12172:106605519, gene20594:106613585, gene2077:106561687, gene34312:106573260, gene35151:106574083, gene3903:106579350, gene3951:106579844, gene3952:106579851, gene48806:106587570, gene7097:106600739	0.00197
169	BP	GO:0001547	antral ovarian follicle growth	gene12026:106605376, gene14776:106607967, gene22860:106562012, gene2772:106568685, gene4034:100195405, gene4305:106583301	0.00207
170	BP	GO:0003009	skeletal muscle contraction	gene10487:106603933, gene10970:106604332, gene12239:100194549, gene14147:106607269, gene14920:106608137, gene18049:106611134, gene1833:106611887, gene23906:106563047, gene2609:106566303, gene29994:106568943, gene30373:106569150, gene32862:100380418, gene32863:106571588, gene45350:106584199, gene7367:106601000	0.00229
171	BP	GO:0032496	response to lipopolysaccharide	gene10703:106604126, gene1080:106604807, gene11332:106604687, gene11900:100136378, gene13819:106607038, gene14213:106607496, gene14486:106607709, gene15578:106608616, gene15839:106608947, gene16790:106609880, gene17634:100379103, gene18957:106611923, gene21673:106561047, gene21752:100136415, gene2362:100380443, gene239:106562016, gene24131:106563235, gene26045:106565194, gene2772:106568685, gene2…	0.00249
172	BP	GO:2000189	positive regulation of cholesterol homeo...	gene11900:100136378, gene14213:106607496, gene28170:106567064, gene4157:106582110, gene44423:106583303, gene50244:106588668	0.0026
173	BP	GO:2000849	regulation of glucocorticoid secretion	gene31433:106570295, gene33265:106572187, gene33594:106572443, gene41770:100196588, gene44144:106582942, gene44651:106583488	0.0026
174	BP	GO:2000637	positive regulation of gene silencing by...	gene12172:106605519, gene31739:106570615, gene3903:106579350, gene39262:106578158, gene42649:106581490, gene48806:106587570	0.0026
175	BP	GO:0033092	positive regulation of immature T cell p...	gene25631:106564949, gene29753:106568664, gene39479:106578384, gene52078:100380496	0.0027
176	BP	GO:0010868	negative regulation of triglyceride bios...	gene19475:106612460, gene21822:106560921, gene50303:106588784, gene53914:106591915	0.0027
177	BP	GO:0001892	embryonic placenta development	gene11932:106605293, gene12423:106605774, gene13721:106606950, gene13819:106607038, gene13950:106607162, gene14634:106607818, gene17148:100380732, gene18134:106611221, gene18163:106611226, gene19537:106612723, gene23546:106562696, gene26566:106565694, gene2715:106567959, gene28336:100194884, gene30132:106568833, gene30398:100196464, gene30455:106569312, gene32676:106571477, gene33633:106572480, g…	0.00302
178	BP	GO:0097285	cell-type specific apoptotic process	gene10424:106603870, gene10703:106604126, gene10745:106604170, gene10852:100196483, gene11179:106604533, gene13951:106607161, gene14047:106607353, gene14239:106607477, gene14351:106607561, gene14431:100195308, gene14776:106607967, gene14920:106608137, gene15496:106608687, gene15578:106608616, gene15601:106608778, gene15839:106608947, gene15897:106608992, gene17999:106610964, gene18049:106611134, …	0.00306
179	BP	GO:0071398	cellular response to fatty acid	gene14239:106607477, gene15578:106608616, gene18957:106611923, gene20449:106613437, gene21338:106560529, gene239:106562016, gene26659:106565842, gene2772:106568685, gene28941:106567948, gene3141:106572527, gene33109:106571946, gene35242:106574143, gene38727:106577610, gene39631:106578540, gene42080:106580930, gene42505:106581358, gene44135:106583028, gene4910:106589359, gene50210:106588640, gene7…	0.00308
180	BP	GO:0043305	negative regulation of mast cell degranu...	gene10117:106603470, gene21199:106560371, gene45347:106584097, gene4980:106590030, gene5016:106590330, gene6530:106599739	0.00321
181	BP	GO:0030812	negative regulation of nucleotide catabo...	gene15578:106608616, gene18163:106611226, gene18957:106611923, gene21752:100136415, gene31164:106569978, gene38292:106577211, gene38727:106577610, gene42867:106581867, gene44664:100136532, gene816:106601984	0.00326
182	BP	GO:0070098	chemokine-mediated signaling pathway	gene22701:106561865, gene29763:100195489, gene30573:106569491, gene32021:100196070, gene35151:106574083, gene3951:106579844, gene3952:106579851, gene42302:106581145, gene42843:106581661, gene42905:106581841, gene47375:100306754, gene5779:106597311, gene6708:106600212	0.00334
183	BP	GO:0045585	positive regulation of cytotoxic T cell ...	gene14920:106608137, gene32862:100380418, gene32863:106571588	0.00343
184	BP	GO:2001256	regulation of store-operated calcium ent...	gene10944:106604295, gene15430:106608537, gene22999:106562092, gene23906:106563047, gene29994:106568943, gene48548:106587185, gene48856:106587624	0.00353
185	BP	GO:0045600	positive regulation of fat cell differen...	gene10188:106603639, gene11332:106604687, gene12283:106605616, gene18182:106611242, gene21752:100136415, gene28336:100194884, gene28770:106567727, gene30398:100196464, gene33633:106572480, gene34579:106573447, gene35151:106574083, gene36507:106575424, gene3772:106577891, gene3951:106579844, gene3952:106579851, gene39631:106578540, gene44664:100136532, gene45218:106583970, gene50592:106589020, gen…	0.00357
186	BP	GO:0033029	regulation of neutrophil apoptotic proce...	gene2175:106562568, gene22974:106562111, gene36719:106575635, gene42843:106581661	0.00386
187	BP	GO:0010041	response to iron(III) ion	gene1080:106604807, gene10852:100196483, gene33996:100195428, gene37891:106576803	0.00386
188	BP	GO:0071875	adrenergic receptor signaling pathway	gene10970:106604332, gene11179:106604533, gene11572:106604929, gene21124:106560302, gene23866:106563080, gene2731:106568345, gene31164:106569978, gene45278:106584037, gene45860:106584599, gene46592:106585604, gene6061:106598526	0.00391
189	BP	GO:0007256	activation of JNKK activity	gene15496:106608687, gene3025:106571505, gene35799:106574711, gene51229:106589668, gene841:106602280, gene9956:106603600	0.00393
190	BP	GO:0032232	negative regulation of actin filament bu...	gene15974:106609060, gene20229:106613218, gene29128:106567782, gene29553:106568491, gene3025:106571505, gene31764:106570630, gene42129:106580986, gene43967:106582811, gene46533:106585266, gene48971:106587740, gene52144:106590600, gene56763:106595050, gene7946:106601574, gene9425:106602858	0.00393
191	BP	GO:0055065	metal ion homeostasis	gene10487:106603933, gene10852:100196483, gene10944:106604295, gene11413:106604757, gene11572:106604929, gene11695:106605056, gene12423:106605774, gene13721:106606950, gene13950:106607162, gene14047:106607353, gene14239:106607477, gene14667:106607847, gene15126:106608296, gene15430:106608537, gene1840:106611846, gene18795:106611714, gene18872:106611857, gene19409:106612386, gene20449:106613437, g…	0.00408
192	BP	GO:0019935	cyclic-nucleotide-mediated signaling	gene11179:106604533, gene16418:106609526, gene21124:106560302, gene29052:106567843, gene32078:106570940, gene33109:106571946, gene39308:106578207, gene3932:106579570, gene39504:106578415, gene39631:106578540, gene40143:106579016, gene40309:106579376, gene43038:106581900, gene44299:106583079, gene45278:106584037, gene46592:106585604, gene50825:106589334, gene50835:106589342, gene50908:106589397, g…	0.00416
193	BP	GO:0050877	neurological system process	gene10424:106603870, gene10703:106604126, gene1080:106604807, gene10970:106604332, gene11499:106604864, gene11572:106604929, gene11932:106605293, gene12423:106605774, gene12863:106606205, gene1306:106607506, gene13721:106606950, gene13950:106607162, gene14047:106607353, gene14257:106607467, gene14350:106607562, gene14486:106607709, gene14878:106608063, gene15443:106608552, gene15839:106608947, ge…	0.00416
194	BP	GO:0046685	response to arsenic-containing substance	gene10424:106603870, gene1080:106604807, gene19986:106613013, gene24514:106563702, gene31220:106569927, gene36639:106575550, gene37891:106576803, gene42170:106581028, gene42304:100286711, gene45475:106584219, gene45630:106584368, gene48968:106587736, gene4980:106590030, gene5016:106590330	0.00428
195	BP	GO:0042752	regulation of circadian rhythm	gene11332:106604687, gene11900:100136378, gene13088:106606447, gene14213:106607496, gene14351:106607561, gene14878:106608063, gene15578:106608616, gene18957:106611923, gene19475:106612460, gene20799:106613773, gene20852:106613816, gene21752:100136415, gene21822:106560921, gene24514:106563702, gene2772:106568685, gene28170:106567064, gene28692:106567574, gene29145:106567770, gene30097:100301980, g…	0.00449
196	BP	GO:0035206	regulation of hemocyte proliferation	gene16958:106610047, gene16976:106610117, gene17040:106610132, gene30132:106568833, gene39628:106578536, gene497:106589077, gene8870:106602413, gene8926:106602499, gene8938:106602507, gene8961:106602616	0.00459
197	BP	GO:0031650	regulation of heat generation	gene14486:106607709, gene23866:106563080, gene2731:106568345, gene29506:106568426, gene39308:106578207, gene45218:106583970	0.00476
198	BP	GO:0032328	alanine transport	gene16405:106609517, gene37490:100306766, gene37492:106576408, gene38905:106577803, gene48638:106587403, gene48808:106587573	0.00476
199	BP	GO:0061304	retinal blood vessel morphogenesis	gene1080:106604807, gene28784:106567714, gene37891:106576803, gene42040:106580877, gene47914:106586666	0.0049
200	BP	GO:0001764	neuron migration	gene10527:100136800, gene11179:106604533, gene11932:106605293, gene14920:106608137, gene16545:106609631, gene21822:106560921, gene22874:106562067, gene23047:106562220, gene23837:106562982, gene24131:106563235, gene26770:106565734, gene2715:106567959, gene2781:106568818, gene28033:106566773, gene29771:106568778, gene30070:106568884, gene30455:106569312, gene30573:106569491, gene31164:106569978, ge…	0.00494
201	BP	GO:0007187	G-protein coupled receptor signaling pat...	gene10970:106604332, gene11179:106604533, gene11572:106604929, gene13172:106606520, gene14486:106607709, gene20449:106613437, gene22534:106561692, gene27412:106566362, gene2772:106568685, gene29553:106568491, gene31303:106569856, gene3141:106572527, gene31818:106570678, gene32078:106570940, gene33109:106571946, gene35242:106574143, gene36810:106575713, gene37205:106576108, gene3889:106579025, gen…	0.0051
202	BP	GO:0048915	posterior lateral line system developmen...	gene1306:106607506, gene22874:106562067, gene2715:106567959, gene29553:106568491, gene35242:106574143, gene38169:106577044, gene41366:106579855, gene48378:106587142	0.00529
203	BP	GO:0030803	negative regulation of cyclic nucleotide...	gene161:106607246, gene20449:106613437, gene29052:106567843, gene29528:106568449, gene31305:106569851, gene3141:106572527, gene32078:106570940, gene3922:106579439, gene39308:106578207, gene50190:106588616, gene9916:106603240	0.0053
204	BP	GO:0030099	myeloid cell differentiation	gene10188:106603639, gene12283:106605616, gene12423:106605774, gene12936:106606295, gene13721:106606950, gene13819:106607038, gene13852:106607080, gene13950:106607162, gene13951:106607161, gene14634:106607818, gene14776:106607967, gene15126:106608296, gene15127:106608314, gene15578:106608616, gene16123:106609198, gene17148:100380732, gene19537:106612723, gene19567:106612694, gene20799:106613773, …	0.00549
205	BP	GO:0035634	response to stilbenoid	gene15578:106608616, gene18957:106611923, gene38727:106577610	0.00575
206	BP	GO:0007329	positive regulation of transcription fro...	gene15578:106608616, gene18957:106611923, gene38727:106577610	0.00575
207	BP	GO:2000184	positive regulation of progesterone bios...	gene15578:106608616, gene18957:106611923, gene38727:106577610	0.00575
208	BP	GO:0036273	response to statin	gene15578:106608616, gene18957:106611923, gene38727:106577610	0.00575
209	BP	GO:0006355	regulation of transcription, DNA-templat...	gene10079:106603496, gene10188:106603639, gene10316:106603784, gene10377:100846970, gene10424:106603870, gene10454:106603903, gene10488:106603934, gene10527:100136800, gene1057:106604587, gene10664:106604092, gene10703:106604126, gene10745:106604170, gene1080:106604807, gene10828:106604185, gene11082:106604495, gene11332:106604687, gene11348:106604804, gene11386:106604738, gene11742:106605100, ge…	0.00581
210	BP	GO:0035290	trunk segmentation	gene16545:106609631, gene16958:106610047, gene16976:106610117, gene17040:106610132, gene28033:106566773, gene37579:106576484, gene8870:106602413, gene8938:106602507, gene8961:106602616	0.00598
211	BP	GO:0003085	negative regulation of systemic arterial...	gene10970:106604332, gene11572:106604929, gene3448:106574976, gene43593:100136911, gene46592:106585604, gene47528:100136407, gene76056:106594346, gene9857:100380342	0.00603
212	BP	GO:0035094	response to nicotine	gene11330:106604686, gene14486:106607709, gene15839:106608947, gene20824:106613792, gene21673:106561047, gene21752:100136415, gene23906:106563047, gene29994:106568943, gene33996:100195428, gene39631:106578540, gene44664:100136532, gene48502:106587222, gene4980:106590030, gene5016:106590330, gene50210:106588640, gene771:106601178	0.00605
213	BP	GO:0048145	regulation of fibroblast proliferation	gene13767:106606991, gene14431:100195308, gene15839:106608947, gene25631:106564949, gene29753:106568664, gene29991:106568945, gene30455:106569312, gene30708:106569597, gene32021:100196070, gene33996:100195428, gene36507:106575424, gene39479:106578384, gene39504:106578415, gene39631:106578540, gene4020:106580392, gene40691:106579574, gene43566:106582401, gene45510:106584280, gene47002:106585786, g…	0.0064
214	BP	GO:0000083	regulation of transcription involved in ...	gene12026:106605376, gene14431:100195308, gene22860:106562012, gene23183:106562338, gene23243:106562395, gene24131:106563235, gene25601:106564750, gene4034:100195405, gene4735:106587379, gene48456:106587264, gene6148:106598913	0.00643
215	BP	GO:0042093	T-helper cell differentiation	gene10316:106603784, gene10377:100846970, gene10852:100196483, gene12941:106606293, gene12942:106606296, gene15127:106608314, gene20594:106613585, gene2077:106561687, gene20826:100196527, gene20852:106613816, gene21150:106560326, gene24878:106564008, gene24921:106564056, gene24923:106564050, gene25254:106564402, gene25257:106564400, gene25337:106564484, gene25338:106564487, gene25407:106564555, g…	0.00664
216	BP	GO:0033629	negative regulation of cell adhesion med...	gene1080:106604807, gene15839:106608947, gene33265:106572187, gene33594:106572443, gene37891:106576803, gene44144:106582942	0.00679
217	BP	GO:0007468	regulation of rhodopsin gene expression	gene24131:106563235, gene4735:106587379, gene48544:101448035, gene6148:106598913	0.00711
218	BP	GO:1901989	positive regulation of cell cycle phase ...	gene1080:106604807, gene10960:106604318, gene12936:106606295, gene14920:106608137, gene16123:106609198, gene23183:106562338, gene24908:106564038, gene25066:106564203, gene25601:106564750, gene31164:106569978, gene32863:106571588, gene34251:100306852, gene3599:106576519, gene36489:106575389, gene36639:106575550, gene37209:106576111, gene37657:106576565, gene37891:106576803, gene38685:106577577, ge…	0.00712
219	BP	GO:0043619	regulation of transcription from RNA pol...	gene12423:106605774, gene13721:106606950, gene13950:106607162, gene36143:106575067, gene4980:106590030, gene5016:106590330, gene51060:106589531, gene7609:106601241	0.00775
220	BP	GO:0044321	response to leptin	gene11900:100136378, gene14213:106607496, gene28170:106567064, gene4157:106582110, gene44423:106583303, gene50210:106588640, gene50244:106588668, gene76056:106594346	0.00775
221	BP	GO:0010107	potassium ion import	gene18049:106611134, gene1833:106611887, gene21673:106561047, gene28816:106567683, gene2979:100136908, gene30307:106569207, gene39060:106577937, gene42360:106581096	0.00775
222	BP	GO:0045742	positive regulation of epidermal growth ...	gene25498:106564692, gene25538:106564658, gene31457:100136469, gene33996:100195428, gene41882:106580735, gene43885:106582617, gene50277:100136468, gene53914:106591915	0.00775
223	BP	GO:0045670	regulation of osteoclast differentiation	gene13951:106607161, gene15578:106608616, gene19567:106612694, gene20799:106613773, gene21338:106560529, gene26566:106565694, gene27600:106566511, gene28336:100194884, gene32676:106571477, gene3292:106573644, gene33633:106572480, gene35151:106574083, gene38727:106577610, gene3951:106579844, gene3952:106579851, gene39631:106578540, gene41882:106580735, gene57355:106592182, gene72607:106594641, gen…	0.00802
224	BP	GO:0001525	angiogenesis	gene10500:106603948, gene10527:100136800, gene1080:106604807, gene10970:106604332, gene11414:106604810, gene12423:106605774, gene13721:106606950, gene13767:106606991, gene13950:106607162, gene13951:106607161, gene14351:106607561, gene15839:106608947, gene16545:106609631, gene18163:106611226, gene19396:100194513, gene20824:106613792, gene20852:106613816, gene22237:106561392, gene22701:106561865, g…	0.00866
225	BP	GO:0001655	urogenital system development	gene10188:106603639, gene10424:106603870, gene11082:106604495, gene1198:106606339, gene12172:106605519, gene12283:106605616, gene14634:106607818, gene15496:106608687, gene16241:106609348, gene16958:106610047, gene1697:106613059, gene16976:106610117, gene17040:106610132, gene17851:106610840, gene17911:106611037, gene18047:106611136, gene19537:106612723, gene19986:106613013, gene21199:106560371, ge…	0.00868
226	BP	GO:0071459	protein localization to chromosome, cent...	gene20799:106613773, gene23183:106562338, gene31079:106570042, gene59949:106594802, gene62277:106594362, gene70675:106594820, gene9574:106603045	0.00873
227	BP	GO:0014821	phasic smooth muscle contraction	gene13172:106606520, gene22229:106561399, gene29528:106568449, gene34413:106573165, gene39308:106578207, gene41235:106579965, gene825:106602103	0.00873
228	BP	GO:0007553	regulation of ecdysteroid metabolic proc...	gene14213:106607496, gene4157:106582110, gene50244:106588668	0.0088
229	BP	GO:0010157	response to chlorate	gene26045:106565194, gene41666:106580541, gene44744:106583415	0.0088
230	BP	GO:0000902	cell morphogenesis	gene10316:106603784, gene10424:106603870, gene10664:106604092, gene10703:106604126, gene10852:100196483, gene10944:106604295, gene11179:106604533, gene11413:106604757, gene1198:106606339, gene12027:106605377, gene12172:106605519, gene1267:106608700, gene12942:106606296, gene12957:106606308, gene12981:106606328, gene13954:106607159, gene14257:106607467, gene14303:106607436, gene14351:106607561, ge…	0.00915
231	BP	GO:0035815	positive regulation of renal sodium excr...	gene2772:106568685, gene31261:106569878, gene31433:106570295, gene39308:106578207, gene9857:100380342	0.00921
232	BP	GO:0060125	negative regulation of growth hormone se...	gene13172:106606520, gene33265:106572187, gene33594:106572443, gene44144:106582942, gene825:106602103	0.00921
233	BP	GO:1900372	negative regulation of purine nucleotide...	gene161:106607246, gene20449:106613437, gene29052:106567843, gene29528:106568449, gene31305:106569851, gene3141:106572527, gene32078:106570940, gene3922:106579439, gene39308:106578207, gene50190:106588616, gene9916:106603240	0.00924
234	BP	GO:0046149	pigment catabolic process	gene43113:106581954, gene4980:106590030, gene5016:106590330, gene725:106601609	0.00926
235	BP	GO:0071603	endothelial cell-cell adhesion	gene1080:106604807, gene37891:106576803, gene3980:106580063, gene45253:106584018	0.00926
236	BP	GO:0045464	R8 cell fate specification	gene24131:106563235, gene4735:106587379, gene47816:106586596, gene6148:106598913	0.00926
237	BP	GO:0006787	porphyrin-containing compound catabolic ...	gene43113:106581954, gene4980:106590030, gene5016:106590330, gene725:106601609	0.00926
238	BP	GO:0042073	intraciliary transport	gene14303:106607436, gene1626:106610906, gene17896:106611048, gene25284:106564432, gene41551:106580428, gene42253:106581181, gene51876:106590329, gene5702:106596460, gene9414:100195722	0.00927
239	BP	GO:0048875	chemical homeostasis within a tissue	gene12423:106605774, gene13721:106606950, gene13950:106607162, gene23906:106563047, gene29994:106568943, gene30455:106569312, gene47677:106586446, gene51060:106589531, gene7609:106601241	0.00927
240	BP	GO:0048469	cell maturation	gene10079:106603496, gene10703:106604126, gene11497:106604868, gene12423:106605774, gene12863:106606205, gene13721:106606950, gene13950:106607162, gene14776:106607967, gene15126:106608296, gene17851:106610840, gene19554:106612708, gene20799:106613773, gene20826:100196527, gene21411:106560567, gene21564:106560790, gene22400:100136366, gene23183:106562338, gene23243:106562395, gene23546:106562696, …	0.0094
241	BP	GO:0003281	ventricular septum development	gene10527:100136800, gene14467:106607691, gene14634:106607818, gene17615:106610673, gene18163:106611226, gene22999:106562092, gene26276:106565395, gene2715:106567959, gene30924:106569803, gene31303:106569856, gene33738:106572630, gene35566:106574559, gene36388:106575303, gene36729:106575647, gene42505:106581358, gene43185:106582008, gene47876:106586638, gene48548:106587185, gene48856:106587624, g…	0.0094
242	BP	GO:0071248	cellular response to metal ion	gene1198:106606339, gene13819:106607038, gene15578:106608616, gene15839:106608947, gene16788:106609879, gene18957:106611923, gene19252:106612245, gene19986:106613013, gene21390:106560584, gene22999:106562092, gene23370:106562514, gene23546:106562696, gene24890:106564020, gene24921:106564056, gene25248:106564415, gene25257:106564400, gene25349:106564490, gene25407:106564555, gene28200:106567082, g…	0.00945
243	BP	GO:0035864	response to potassium ion	gene15578:106608616, gene15839:106608947, gene18957:106611923, gene28816:106567683, gene38727:106577610, gene42360:106581096, gene44299:106583079, gene48247:106587027	0.00981
244	BP	GO:0072707	cellular response to sodium dodecyl sulf...	gene12936:106606295, gene24908:106564038, gene25066:106564203, gene3599:106576519, gene36489:106575389, gene4622:106588356, gene5380:106593448	0.00996
245	BP	GO:0045445	myoblast differentiation	gene10527:100136800, gene12423:106605774, gene13721:106606950, gene13950:106607162, gene13951:106607161, gene21338:106560529, gene21752:100136415, gene22767:100196456, gene23183:106562338, gene24384:106563418, gene26276:106565395, gene26325:106565435, gene30725:106569611, gene32253:106571103, gene37348:106576243, gene42647:106581498, gene44664:100136532, gene47438:106586209, gene50835:106589342, …	0.01016
246	BP	GO:0048146	positive regulation of fibroblast prolif...	gene13767:106606991, gene14431:100195308, gene15839:106608947, gene25631:106564949, gene29753:106568664, gene29991:106568945, gene30455:106569312, gene36507:106575424, gene39479:106578384, gene4020:106580392, gene40691:106579574, gene45510:106584280, gene47145:106585900, gene47677:106586446, gene51932:106590387, gene52078:100380496, gene54636:106591582, gene6196:106599020	0.01022
247	BP	GO:0019933	cAMP-mediated signaling	gene11179:106604533, gene21124:106560302, gene29052:106567843, gene32078:106570940, gene33109:106571946, gene3932:106579570, gene39504:106578415, gene39631:106578540, gene40143:106579016, gene40309:106579376, gene43038:106581900, gene45278:106584037, gene46592:106585604, gene50825:106589334, gene50835:106589342, gene6061:106598526, gene981:106602991, gene9916:106603240	0.01022
248	BP	GO:0046683	response to organophosphorus	gene1080:106604807, gene10944:106604295, gene11179:106604533, gene11348:106604804, gene13767:106606991, gene13819:106607038, gene14257:106607467, gene15578:106608616, gene15839:106608947, gene21338:106560529, gene21673:106561047, gene22311:106561572, gene22400:100136366, gene22961:100195460, gene2341:106564343, gene239:106562016, gene29052:106567843, gene29251:106568203, gene29991:106568945, gene…	0.01022
249	BP	GO:0007589	body fluid secretion	gene10745:106604170, gene10852:100196483, gene14257:106607467, gene19280:106612265, gene25498:106564692, gene26826:106565979, gene2772:106568685, gene27891:106566896, gene28441:106567289, gene30455:106569312, gene31261:106569878, gene31433:106570295, gene31457:100136469, gene32078:106570940, gene34251:100306852, gene37273:106576177, gene37657:106576565, gene39631:106578540, gene4020:106580392, ge…	0.01022
250	BP	GO:0060446	branching involved in open tracheal syst...	gene14632:106607817, gene21199:106560371, gene25538:106564658, gene27286:106566241, gene34283:106573116, gene45347:106584097, gene47816:106586596, gene53914:106591915, gene6530:106599739	0.01027
251	BP	GO:0042310	vasoconstriction	gene11572:106604929, gene20824:106613792, gene239:106562016, gene29528:106568449, gene30455:106569312, gene3448:106574976, gene38261:106577160, gene3889:106579025, gene39308:106578207, gene41235:106579965, gene43593:100136911, gene45218:106583970, gene45307:106584062, gene46534:106585267, gene47528:100136407, gene47677:106586446, gene47876:106586638, gene4910:106589359, gene50210:106588640, gene5…	0.01029
252	BP	GO:0030818	negative regulation of cAMP biosynthetic...	gene20449:106613437, gene29052:106567843, gene29528:106568449, gene31305:106569851, gene3141:106572527, gene32078:106570940, gene3922:106579439, gene39308:106578207, gene50190:106588616, gene9916:106603240	0.01031
253	BP	GO:0043067	regulation of programmed cell death	gene10188:106603639, gene10424:106603870, gene1047:106604528, gene10500:106603948, gene10703:106604126, gene10740:106604165, gene10745:106604170, gene1080:106604807, gene10852:100196483, gene10970:106604332, gene11082:106604495, gene11179:106604533, gene11386:106604738, gene11414:106604810, gene11783:106605134, gene1198:106606339, gene12936:106606295, gene13147:106606502, gene13241:106606595, gen…	0.01036
254	BP	GO:0030855	epithelial cell differentiation	gene1080:106604807, gene10944:106604295, gene11179:106604533, gene11330:106604686, gene11348:106604804, gene11932:106605293, gene13787:106607014, gene13951:106607161, gene14047:106607353, gene14239:106607477, gene14257:106607467, gene14351:106607561, gene14634:106607818, gene1493:106609599, gene15778:106608879, gene16020:106609113, gene16241:106609348, gene17388:106610440, gene17999:106610964, ge…	0.01048
255	BP	GO:0000185	activation of MAPKKK activity	gene21150:106560326, gene38627:106577529, gene45383:106584172, gene47002:106585786, gene6159:106598934, gene97:106601952	0.01093
256	BP	GO:0048286	lung alveolus development	gene10852:100196483, gene16077:106609245, gene17884:106611061, gene20594:106613585, gene2077:106561687, gene21199:106560371, gene2715:106567959, gene2866:106569712, gene31303:106569856, gene31716:106570575, gene3448:106574976, gene39631:106578540, gene45312:106584067, gene45347:106584097, gene45585:106584342, gene4681:106587857, gene50210:106588640, gene58068:106595527, gene6530:106599739	0.01094
257	BP	GO:0007588	excretion	gene10944:106604295, gene11432:100196601, gene11572:106604929, gene22999:106562092, gene2772:106568685, gene28816:106567683, gene2979:100136908, gene31261:106569878, gene31433:106570295, gene39308:106578207, gene42360:106581096, gene43885:106582617, gene46612:106585585, gene47804:106586587, gene47816:106586596, gene48548:106587185, gene4980:106590030, gene5016:106590330, gene51222:100195417, gene…	0.01097
258	BP	GO:0001974	blood vessel remodeling	gene10852:100196483, gene11572:106604929, gene12423:106605774, gene13721:106606950, gene13950:106607162, gene22767:100196456, gene22999:106562092, gene29553:106568491, gene3448:106574976, gene35151:106574083, gene3951:106579844, gene3952:106579851, gene43593:100136911, gene47528:100136407, gene48548:106587185, gene48856:106587624, gene497:106589077, gene51060:106589531, gene7609:106601241, gene98…	0.01099
259	BP	GO:0071385	cellular response to glucocorticoid stim...	gene1080:106604807, gene10944:106604295, gene13172:106606520, gene15839:106608947, gene26325:106565435, gene31486:106570356, gene37891:106576803, gene43113:106581954, gene43593:100136911, gene45653:106584385, gene45860:106584599, gene46612:106585585, gene47528:100136407, gene50210:106588640, gene50604:106589037, gene51815:106590294, gene825:106602103, gene9857:100380342	0.01103
260	BP	GO:0070305	response to cGMP	gene11179:106604533, gene15839:106608947, gene29052:106567843, gene8475:106602109, gene9916:106603240	0.01109
261	BP	GO:0071321	cellular response to cGMP	gene11179:106604533, gene15839:106608947, gene29052:106567843, gene8475:106602109, gene9916:106603240	0.01109
262	BP	GO:0002711	positive regulation of T cell mediated i...	gene15897:106608992, gene19986:106613013, gene23944:106563020, gene2536:106566762, gene30132:106568833, gene32285:106571130, gene34008:106572869, gene3947:106579633, gene39628:106578536, gene42304:100286711	0.01129
263	BP	GO:0055119	relaxation of cardiac muscle	gene10487:106603933, gene18049:106611134, gene1833:106611887, gene21124:106560302, gene2609:106566303, gene38261:106577160, gene41235:106579965, gene43038:106581900, gene45278:106584037, gene6061:106598526	0.01129
264	BP	GO:0071345	cellular response to cytokine stimulus	gene10117:106603470, gene10377:100846970, gene1047:106604528, gene1080:106604807, gene10828:106604185, gene13767:106606991, gene13852:106607080, gene14878:106608063, gene14920:106608137, gene15578:106608616, gene15839:106608947, gene17148:100380732, gene18957:106611923, gene19252:106612245, gene20852:106613816, gene21199:106560371, gene21673:106561047, gene21902:106560850, gene22237:106561392, ge…	0.0116
265	BP	GO:0030336	negative regulation of cell migration	gene10117:106603470, gene1080:106604807, gene10944:106604295, gene11932:106605293, gene14634:106607818, gene15578:106608616, gene15839:106608947, gene16545:106609631, gene17163:106610255, gene1842:106611807, gene18957:106611923, gene21663:106561069, gene21752:100136415, gene22874:106562067, gene26770:106565734, gene2772:106568685, gene27730:106566645, gene2781:106568818, gene28033:106566773, gene…	0.01161
266	BP	GO:0014043	negative regulation of neuron maturation	gene10079:106603496, gene29528:106568449, gene31164:106569978, gene39308:106578207	0.01178
267	BP	GO:0009560	embryo sac egg cell differentiation	gene40889:106579776, gene46186:106585245, gene59949:106594802, gene70675:106594820	0.01178
268	BP	GO:0007600	sensory perception	gene1080:106604807, gene10970:106604332, gene11932:106605293, gene12423:106605774, gene13721:106606950, gene13950:106607162, gene14486:106607709, gene14878:106608063, gene15839:106608947, gene16020:106609113, gene16260:106609368, gene16790:106609880, gene17911:106611037, gene17999:106610964, gene18134:106611221, gene1840:106611846, gene18872:106611857, gene19396:100194513, gene19554:106612708, ge…	0.012
269	BP	GO:0051497	negative regulation of stress fiber asse...	gene15974:106609060, gene20229:106613218, gene29128:106567782, gene29553:106568491, gene31764:106570630, gene42129:106580986, gene43967:106582811, gene46533:106585266, gene48971:106587740, gene52144:106590600, gene56763:106595050, gene9425:106602858	0.01222
270	CC	GO:0031674	I band	gene10487:106603933, gene10500:106603948, gene1057:106604587, gene11572:106604929, gene12239:100194549, gene14147:106607269, gene14920:106608137, gene15443:106608552, gene1842:106611807, gene22534:106561692, gene2255:106563467, gene22767:100196456, gene23032:106562199, gene23906:106563047, gene2609:106566303, gene29339:106568146, gene29728:106568643, gene29994:106568943, gene30924:106569803, gene…	0.00048
271	CC	GO:0005887	integral component of plasma membrane	gene10970:106604332, gene11051:106604362, gene11082:106604495, gene11179:106604533, gene11330:106604686, gene11414:106604810, gene11497:106604868, gene11572:106604929, gene11695:106605056, gene12169:106605517, gene13172:106606520, gene13298:106606647, gene14257:106607467, gene14486:106607709, gene14667:106607847, gene15126:106608296, gene15430:106608537, gene15601:106608778, gene15708:106608835, …	0.00116
272	CC	GO:0000229	cytoplasmic chromosome	gene25678:106564905, gene4626:106586546, gene7803:100286590	0.00172
273	CC	GO:0035189	Rb-E2F complex	gene14431:100195308, gene23183:106562338, gene23243:106562395, gene28336:100194884, gene30398:100196464	0.00362
274	CC	GO:0097440	apical dendrite	gene10424:106603870, gene15578:106608616, gene18957:106611923, gene22534:106561692, gene25498:106564692, gene38727:106577610, gene40183:106579321, gene45475:106584219, gene46518:106584971, gene50603:106589038	0.00461
275	CC	GO:0016442	RISC complex	gene12172:106605519, gene36639:106575550, gene3903:106579350, gene48806:106587570, gene49703:100380831, gene53914:106591915, gene6892:106600575	0.00525
276	CC	GO:0005903	brush border	gene10852:100196483, gene11179:106604533, gene12169:106605517, gene14920:106608137, gene16260:106609368, gene16405:106609517, gene17163:106610255, gene1842:106611807, gene18872:106611857, gene22534:106561692, gene23675:106562829, gene28200:106567082, gene29506:106568426, gene32862:100380418, gene32863:106571588, gene3388:106574328, gene3506:106575505, gene37490:100306766, gene37492:106576408, gen…	0.00633
277	CC	GO:0043197	dendritic spine	gene10970:106604332, gene11179:106604533, gene11900:100136378, gene12957:106606308, gene14213:106607496, gene15010:106608153, gene161:106607246, gene18049:106611134, gene18819:106611696, gene19414:106612392, gene19986:106613013, gene20449:106613437, gene227:106612547, gene25498:106564692, gene27536:106566450, gene28170:106567064, gene30373:106569150, gene31164:106569978, gene3141:106572527, gene3…	0.00943
278	CC	GO:0043025	neuronal cell body	gene10740:106604165, gene10852:100196483, gene10970:106604332, gene11179:106604533, gene11414:106604810, gene11497:106604868, gene12957:106606308, gene13767:106606991, gene14047:106607353, gene14920:106608137, gene15010:106608153, gene15443:106608552, gene15578:106608616, gene15839:106608947, gene15955:106609032, gene161:106607246, gene16405:106609517, gene18047:106611136, gene18049:106611134, ge…	0.0099
279	CC	GO:0045095	keratin filament	gene29761:106568670, gene36715:106575629, gene36721:106575639, gene36722:106575637, gene4685:106587804, gene4690:100195545, gene7305:106600815	0.01046
280	CC	GO:0048786	presynaptic active zone	gene29990:106568946, gene30622:106569508, gene33594:106572443, gene3932:106579570, gene4125:106581810, gene43885:106582617, gene44144:106582942, gene47145:106585900, gene48971:106587740, gene61616:106594092, gene6195:106599022, gene7946:106601574	0.01093
281	CC	GO:0030018	Z disc	gene10500:106603948, gene1057:106604587, gene11572:106604929, gene12239:100194549, gene14147:106607269, gene14920:106608137, gene15443:106608552, gene1842:106611807, gene22534:106561692, gene22767:100196456, gene23906:106563047, gene29728:106568643, gene29994:106568943, gene30924:106569803, gene32862:100380418, gene32863:106571588, gene35566:106574559, gene36388:106575303, gene36715:106575629, ge…	0.01172
282	CC	GO:0034752	cytosolic aryl hydrocarbon receptor comp...	gene43593:100136911, gene47528:100136407, gene51815:106590294	0.01212
283	CC	GO:0034753	nuclear aryl hydrocarbon receptor comple...	gene43593:100136911, gene47528:100136407, gene51815:106590294	0.01212
284	CC	GO:0036488	CHOP-C/EBP complex	gene28336:100194884, gene30398:100196464, gene33633:106572480	0.01212
285	CC	GO:0005642	annulate lamellae	gene59949:106594802, gene62277:106594362, gene70675:106594820	0.01212
286	CC	GO:0017053	transcriptional repressor complex	gene10079:106603496, gene10188:106603639, gene10664:106604092, gene12283:106605616, gene16958:106610047, gene17163:106610255, gene17634:100379103, gene18944:106611936, gene20831:106613796, gene24131:106563235, gene24493:106563652, gene28770:106567727, gene29991:106568945, gene30708:106569597, gene33738:106572630, gene34251:100306852, gene3772:106577891, gene42867:106581867, gene45510:106584280, g…	0.01326
287	CC	GO:0009279	cell outer membrane	gene28200:106567082, gene38124:106577006, gene39327:106578226, gene41235:106579965	0.01397
288	CC	GO:0030313	cell envelope	gene28200:106567082, gene38124:106577006, gene39327:106578226, gene41235:106579965	0.01397
289	CC	GO:0031983	vesicle lumen	gene14920:106608137, gene15839:106608947, gene26045:106565194, gene30455:106569312, gene32862:100380418, gene32863:106571588, gene34579:106573447, gene43093:106581936, gene44744:106583415, gene45529:106584295, gene47677:106586446, gene76109:106594202, gene9857:100380342	0.01444
290	CC	GO:0001533	cornified envelope	gene13787:106607014, gene26813:106565964, gene43967:106582811, gene43968:106582810, gene45529:106584295, gene7771:106601393	0.01549
291	CC	GO:0070435	Shc-EGFR complex	gene20824:106613792, gene30455:106569312, gene47677:106586446	0.01659
292	CC	GO:0001917	photoreceptor inner segment	gene11179:106604533, gene1840:106611846, gene19986:106613013, gene22701:106561865, gene26964:106566029, gene34008:106572869, gene35242:106574143, gene42304:100286711, gene51876:106590329, gene5702:106596460, gene76056:106594346, gene7946:106601574	0.01692
293	CC	GO:0032279	asymmetric synapse	gene19986:106613013, gene27536:106566450, gene33354:106572111, gene34008:106572869, gene42304:100286711, gene43885:106582617	0.01762
294	CC	GO:0036064	ciliary basal body	gene11236:106604590, gene12172:106605519, gene15601:106608778, gene1626:106610906, gene17911:106611037, gene1840:106611846, gene25462:106564614, gene31305:106569851, gene36401:106575312, gene4073:106581009, gene4859:100196535, gene48806:106587570, gene50303:106588784, gene51561:106590007, gene51876:106590329, gene5702:106596460, gene5752:106597204, gene76056:106594346	0.01785
295	CC	GO:0031526	brush border membrane	gene10852:100196483, gene12169:106605517, gene14920:106608137, gene16260:106609368, gene28200:106567082, gene29506:106568426, gene32862:100380418, gene32863:106571588, gene3906:106579373, gene47436:106586206, gene51256:100380841, gene57709:106592319, gene6084:106598808, gene7946:106601574	0.01911
296	CC	GO:0005634	nucleus	gene10040:106603530, gene10079:106603496, gene10188:106603639, gene10316:106603784, gene10339:106603764, gene10377:100846970, gene10389:106603841, gene10424:106603870, gene10454:106603903, gene1047:106604528, gene10487:106603933, gene10488:106603934, gene10500:106603948, gene10527:100136800, gene10664:106604092, gene10703:106604126, gene10735:106604162, gene10740:106604165, gene10745:106604170, g…	0.02132
297	CC	GO:0000932	cytoplasmic mRNA processing body	gene10735:106604162, gene12172:106605519, gene13954:106607159, gene20594:106613585, gene2077:106561687, gene31739:106570615, gene34008:106572869, gene34312:106573260, gene35151:106574083, gene3903:106579350, gene39262:106578158, gene3951:106579844, gene3952:106579851, gene42649:106581490, gene48806:106587570, gene49703:100380831, gene50592:106589020, gene6892:106600575	0.02279
298	CC	GO:0008180	COP9 signalosome	gene14303:106607436, gene14920:106608137, gene28423:106567274, gene29128:106567782, gene32863:106571588, gene3388:106574328, gene34008:106572869, gene37209:106576111, gene41551:106580428, gene42129:106580986, gene42253:106581181, gene7092:106600736, gene7385:106601018	0.02543
299	CC	GO:0034751	aryl hydrocarbon receptor complex	gene43593:100136911, gene47528:100136407, gene51815:106590294	0.02791
300	CC	GO:0038037	G-protein coupled receptor dimeric compl...	gene13172:106606520, gene825:106602103	0.02917
301	CC	GO:0034274	Atg12-Atg5-Atg16 complex	gene32056:106570917, gene3660:106576885	0.02917
302	CC	GO:0097648	G-protein coupled receptor complex	gene13172:106606520, gene825:106602103	0.02917
303	CC	GO:0045203	integral component of cell outer membran...	gene38124:106577006, gene39327:106578226	0.02917
304	CC	GO:0031230	intrinsic component of cell outer membra...	gene38124:106577006, gene39327:106578226	0.02917
305	CC	GO:0043198	dendritic shaft	gene19986:106613013, gene20449:106613437, gene22534:106561692, gene23906:106563047, gene29994:106568943, gene30307:106569207, gene31164:106569978, gene3141:106572527, gene34008:106572869, gene38261:106577160, gene39060:106577937, gene42304:100286711, gene4384:106584098, gene46533:106585266, gene47002:106585786, gene48269:106587046	0.03036
306	CC	GO:0043204	perikaryon	gene14920:106608137, gene161:106607246, gene18047:106611136, gene18049:106611134, gene19986:106613013, gene25498:106564692, gene26045:106565194, gene30307:106569207, gene32863:106571588, gene34008:106572869, gene35151:106574083, gene39060:106577937, gene3951:106579844, gene3952:106579851, gene41882:106580735, gene42304:100286711, gene43038:106581900, gene44299:106583079, gene44744:106583415, gene…	0.03132
307	CC	GO:0097542	ciliary tip	gene14303:106607436, gene1626:106610906, gene17896:106611048, gene25284:106564432, gene29128:106567782, gene41551:106580428, gene42253:106581181, gene51876:106590329, gene5702:106596460, gene9414:100195722	0.03291
308	CC	GO:0035102	PRC1 complex	gene13726:106606946, gene25631:106564949, gene29753:106568664, gene39479:106578384, gene4609:106588430, gene52063:106590521, gene52078:100380496	0.03352
309	CC	GO:0032590	dendrite membrane	gene161:106607246, gene18040:106610930, gene18049:106611134, gene30307:106569207, gene39060:106577937, gene44299:106583079, gene45860:106584599	0.03352
310	CC	GO:0030286	dynein complex	gene14303:106607436, gene1626:106610906, gene29128:106567782, gene41551:106580428, gene42129:106580986, gene42253:106581181, gene4485:106586326, gene51561:106590007	0.03417
311	CC	GO:0016323	basolateral plasma membrane	gene10852:100196483, gene11051:106604362, gene11082:106604495, gene11179:106604533, gene14257:106607467, gene14920:106608137, gene15708:106608835, gene15955:106609032, gene21390:106560584, gene22400:100136366, gene22974:106562111, gene23086:106562250, gene23207:100136926, gene28816:106567683, gene2979:100136908, gene30307:106569207, gene30455:106569312, gene32862:100380418, gene32863:106571588, g…	0.03822
312	CC	GO:0043235	receptor complex	gene10970:106604332, gene11082:106604495, gene13172:106606520, gene14920:106608137, gene15601:106608778, gene18040:106610930, gene19906:106612804, gene21411:106560567, gene22974:106562111, gene23944:106563020, gene24245:106563397, gene2536:106566762, gene25803:106564804, gene26498:106565668, gene2715:106567959, gene27412:106566362, gene2781:106568818, gene27891:106566896, gene30455:106569312, gen…	0.03831
313	CC	GO:0005667	transcription factor complex	gene10527:100136800, gene1057:106604587, gene11386:106604738, gene12423:106605774, gene13721:106606950, gene13869:106607101, gene13950:106607162, gene14431:100195308, gene18944:106611936, gene20042:106612968, gene21199:106560371, gene22237:106561392, gene22999:106562092, gene2304:106563948, gene23183:106562338, gene23243:106562395, gene24131:106563235, gene24514:106563702, gene25395:106564542, ge…	0.03931
314	CC	GO:0033193	Lsd1/2 complex	gene30016:106568924, gene35149:106574039	0.04211
315	CC	GO:0097057	TRAF2-GSTP1 complex	gene23944:106563020, gene2536:106566762	0.04211
316	CC	GO:0097635	extrinsic component of autophagosome mem...	gene20064:106612954, gene32056:106570917	0.04211
317	CC	GO:0034464	BBSome	gene17911:106611037, gene5000:106590145, gene76056:106594346	0.04242
318	CC	GO:0043020	NADPH oxidase complex	gene11414:106604810, gene13298:106606647, gene8110:106601740	0.04242
319	CC	GO:0060205	cytoplasmic membrane-bounded vesicle lum...	gene14920:106608137, gene15839:106608947, gene26045:106565194, gene32862:100380418, gene32863:106571588, gene34579:106573447, gene43093:106581936, gene44744:106583415, gene45529:106584295, gene76109:106594202	0.04251
320	CC	GO:0016604	nuclear body	gene10188:106603639, gene10664:106604092, gene10740:106604165, gene11348:106604804, gene12283:106605616, gene12423:106605774, gene13721:106606950, gene13726:106606946, gene13950:106607162, gene14142:106607271, gene18995:106611959, gene19554:106612708, gene19688:106612521, gene22237:106561392, gene22311:106561572, gene23183:106562338, gene24131:106563235, gene24514:106563702, gene25631:106564949, …	0.04254
321	CC	GO:0005927	muscle tendon junction	gene11082:106604495, gene1842:106611807, gene22701:106561865, gene45561:106584319	0.04549
322	CC	GO:0044462	external encapsulating structure part	gene28200:106567082, gene38124:106577006, gene39327:106578226, gene41235:106579965	0.04549

## Sheet: T4_SPLL_GO
X1	Category	ID	Term	Genes	adj_pval
1	MF	GO:0003700	transcription factor activity, sequence-...	gene10188:106603639, gene10316:106603784, gene10342:106603759, gene10527:100136800, gene10745:106604170, gene11332:106604687, gene11900:100136378, gene12283:106605616, gene12426:106605776, gene13759:106606985, gene13819:106607038, gene13852:106607080, gene14213:106607496, gene14257:106607467, gene1493:106609599, gene15269:106608466, gene16077:106609245, gene16782:106609871, gene16952:106610042, g…	1.7e-10
2	MF	GO:0000977	RNA polymerase II regulatory region sequ...	gene10188:106603639, gene10316:106603784, gene10527:100136800, gene11900:100136378, gene12283:106605616, gene12426:106605776, gene13759:106606985, gene13819:106607038, gene13852:106607080, gene14213:106607496, gene16077:106609245, gene17030:106610114, gene17688:106610738, gene20042:106612968, gene21413:106560604, gene21752:100136415, gene23370:106562514, gene2377:106564765, gene24907:106564045, g…	1e-05
3	MF	GO:0001013	RNA polymerase I regulatory region DNA b...	gene28336:100194884, gene30398:100196464, gene33633:106572480, gene6556:106599802	3e-05
4	MF	GO:0016494	C-X-C chemokine receptor activity	gene12205:100195464, gene29763:100195489, gene42905:106581841, gene47375:100306754, gene5779:106597311, gene6708:106600212	4.7e-05
5	MF	GO:0043565	sequence-specific DNA binding	gene10188:106603639, gene10316:106603784, gene10527:100136800, gene11742:106605100, gene11900:100136378, gene12283:106605616, gene12426:106605776, gene13759:106606985, gene13819:106607038, gene13852:106607080, gene14213:106607496, gene14257:106607467, gene15578:106608616, gene16077:106609245, gene16782:106609871, gene16958:106610047, gene17025:106610116, gene17030:106610114, gene17040:106610132, …	8.4e-05
6	MF	GO:0020037	heme binding	gene1080:106604807, gene11414:106604810, gene11900:100136378, gene14213:106607496, gene23207:100136926, gene31312:106570209, gene37891:106576803, gene4157:106582110, gene44393:106583179, gene44423:106583303, gene48784:100136916, gene4980:106590030, gene5016:106590330, gene7293:106600825	0.00012
7	MF	GO:0004879	RNA polymerase II transcription factor a...	gene11900:100136378, gene14213:106607496, gene17688:106610738, gene21752:100136415, gene40806:106579687, gene4157:106582110, gene44423:106583303, gene4454:106585074, gene44664:100136532, gene46613:100196040, gene51815:106590294, gene7293:106600825	0.00027
8	MF	GO:0005328	neurotransmitter:sodium symporter activi...	gene12169:106605517, gene27233:106566182, gene27580:106566494, gene33022:106571856, gene3906:106579373, gene45776:106584498	0.00032
9	MF	GO:0047555	3',5'-cyclic-GMP phosphodiesterase activ...	gene43038:106581900, gene44907:106583711, gene53461:106597306, gene9916:106603240	0.00051
10	MF	GO:0016712	oxidoreductase activity, acting on paire...	gene1080:106604807, gene23207:100136926, gene37891:106576803, gene41902:106580755, gene48784:100136916	0.00051
11	MF	GO:0005332	gamma-aminobutyric acid:sodium symporter...	gene27233:106566182, gene27580:106566494, gene33022:106571856, gene45776:106584498	0.00066
12	MF	GO:0003707	steroid hormone receptor activity	gene11900:100136378, gene14213:106607496, gene17688:106610738, gene21752:100136415, gene4157:106582110, gene44423:106583303, gene44664:100136532, gene46613:100196040, gene50190:106588616, gene7293:106600825	0.00091
13	MF	GO:0070080	titin Z domain binding	gene12239:100194549, gene14147:106607269, gene7367:106601000	0.00091
14	MF	GO:0042826	histone deacetylase binding	gene19475:106612460, gene21822:106560921, gene22212:106561415, gene24903:106564036, gene24908:106564038, gene25337:106564484, gene28336:100194884, gene30314:106569201, gene30398:100196464, gene31634:106570503, gene320:106570052, gene32945:106571833, gene33633:106572480, gene44237:106583131, gene46613:100196040, gene50303:106588784, gene52402:106590982, gene5437:106594023, gene54536:106591075, gen…	0.0011
15	MF	GO:0001046	core promoter sequence-specific DNA bind...	gene11900:100136378, gene13852:106607080, gene14213:106607496, gene24903:106564036, gene24908:106564038, gene25337:106564484, gene25381:106564532, gene32945:106571833, gene39631:106578540, gene4157:106582110, gene42948:106581806, gene44423:106583303, gene52402:106590982, gene5437:106594023, gene54536:106591075, gene5454:106594195, gene5559:106595152, gene63321:106591221, gene7293:106600825, gene7…	0.00121
16	MF	GO:0003714	transcription corepressor activity	gene11900:100136378, gene12283:106605616, gene13819:106607038, gene13852:106607080, gene13869:106607101, gene14213:106607496, gene14867:106608058, gene17315:106610378, gene1954:106560466, gene2377:106564765, gene24493:106563652, gene25381:106564532, gene32601:106571544, gene3772:106577891, gene38104:106576990, gene3903:106579350, gene4157:106582110, gene42916:106581833, gene44314:106583068, gene4…	0.00122
17	MF	GO:0008144	drug binding	gene10858:106604209, gene14486:106607709, gene15897:106608992, gene20272:106613267, gene21752:100136415, gene26209:106565346, gene3869:106579093, gene42905:106581841, gene44582:100196052, gene44664:100136532, gene45278:106584037, gene47375:100306754, gene48247:106587027, gene53461:106597306, gene6708:106600212, gene9916:106603240	0.00127
18	MF	GO:0005251	delayed rectifier potassium channel acti...	gene26953:106566038, gene42916:106581833, gene44299:106583079, gene4454:106585074, gene47388:106586155	0.00137
19	MF	GO:0016493	C-C chemokine receptor activity	gene29763:100195489, gene42905:106581841, gene47375:100306754, gene5779:106597311, gene6708:106600212	0.00137
20	MF	GO:0015171	amino acid transmembrane transporter act...	gene12169:106605517, gene15708:106608835, gene16405:106609517, gene16406:106609518, gene27233:106566182, gene27580:106566494, gene33022:106571856, gene37490:100306766, gene37492:106576408, gene38905:106577803, gene3906:106579373, gene43895:106582726, gene45776:106584498, gene52133:106590589	0.00145
21	MF	GO:0051373	FATZ binding	gene12239:100194549, gene14147:106607269, gene7367:106601000	0.00188
22	MF	GO:0042165	neurotransmitter binding	gene27233:106566182, gene27580:106566494, gene33022:106571856, gene45776:106584498, gene48502:106587222	0.00336
23	MF	GO:0005242	inward rectifier potassium channel activ...	gene28816:106567683, gene42360:106581096, gene42916:106581833, gene4454:106585074, gene47388:106586155	0.00336
24	MF	GO:0038191	neuropilin binding	gene16545:106609631, gene28033:106566773, gene37579:106576484, gene43926:106582759	0.00382
25	MF	GO:0055106	ubiquitin-protein transferase regulator ...	gene14867:106608058, gene25693:106564893, gene39479:106578384, gene50696:106589124, gene52078:100380496	0.00466
26	MF	GO:0001078	transcriptional repressor activity, RNA ...	gene10527:100136800, gene11900:100136378, gene13852:106607080, gene14213:106607496, gene16077:106609245, gene17688:106610738, gene21752:100136415, gene2377:106564765, gene25381:106564532, gene32601:106571544, gene33738:106572630, gene4157:106582110, gene44423:106583303, gene44664:100136532, gene46613:100196040, gene57355:106592182, gene7293:106600825, gene7693:106601356, gene8093:106601729, gene8…	0.00489
27	MF	GO:0045499	chemorepellent activity	gene16545:106609631, gene28033:106566773, gene37579:106576484, gene43926:106582759, gene46248:106585191	0.00516
28	MF	GO:0031699	beta-3 adrenergic receptor binding	gene20633:106613622, gene23866:106563080, gene2731:106568345	0.00527
29	MF	GO:0015101	organic cation transmembrane transporter...	gene15708:106608835, gene18047:106611136, gene217:106560243, gene38905:106577803	0.00582
30	MF	GO:0055131	C3HC4-type RING finger domain binding	gene34008:106572869, gene42916:106581833, gene47388:106586155, gene7385:106601018	0.00582
31	MF	GO:0050682	AF-2 domain binding	gene15578:106608616, gene17688:106610738, gene38727:106577610	0.00646
32	MF	GO:0000155	phosphorelay sensor kinase activity	gene4454:106585074, gene47388:106586155	0.00652
33	MF	GO:0004999	vasoactive intestinal polypeptide recept...	gene30932:106569811, gene47804:106586587	0.00652
34	MF	GO:0001206	transcriptional repressor activity, RNA ...	gene10188:106603639, gene12283:106605616, gene28770:106567727, gene3772:106577891	0.00661
35	MF	GO:0003705	transcription factor activity, RNA polym...	gene10188:106603639, gene12283:106605616, gene13819:106607038, gene16958:106610047, gene17040:106610132, gene17176:106610269, gene25972:106565262, gene28336:100194884, gene28770:106567727, gene30398:100196464, gene33633:106572480, gene36213:106575085, gene3772:106577891, gene39631:106578540, gene41894:100136356, gene46613:100196040, gene47111:106585855, gene497:106589077, gene6530:106599739, gene…	0.00759
36	MF	GO:0001222	transcription corepressor binding	gene11900:100136378, gene14213:106607496, gene4157:106582110, gene44423:106583303, gene7293:106600825	0.009
37	MF	GO:0016501	prostacyclin receptor activity	gene21752:100136415, gene44664:100136532	0.0096
38	MF	GO:0036004	GAF domain binding	gene53461:106597306, gene9916:106603240	0.0096
39	MF	GO:0030977	taurine binding	gene27233:106566182, gene33022:106571856	0.0096
40	MF	GO:0015175	neutral amino acid transmembrane transpo...	gene12169:106605517, gene15708:106608835, gene27233:106566182, gene33022:106571856, gene38905:106577803, gene3906:106579373	0.0115
41	MF	GO:0070539	linoleic acid binding	gene21752:100136415, gene44664:100136532	0.01321
42	MF	GO:0015272	ATP-activated inward rectifier potassium...	gene28816:106567683, gene42360:106581096	0.01321
43	MF	GO:0019955	cytokine binding	gene10740:106604165, gene12205:100195464, gene12239:100194549, gene14147:106607269, gene19537:106612723, gene29763:100195489, gene33675:106572511, gene42905:106581841, gene497:106589077, gene5779:106597311, gene7028:106600678, gene7367:106601000, gene8112:106601741	0.01435
44	MF	GO:0051525	NFAT protein binding	gene16267:106609456, gene21752:100136415, gene44664:100136532	0.01468
45	MF	GO:0030911	TPR domain binding	gene32862:100380418, gene53461:106597306, gene9916:106603240	0.0168
46	MF	GO:0030553	cGMP binding	gene44907:106583711, gene53461:106597306, gene9916:106603240	0.0168
47	MF	GO:0004740	pyruvate dehydrogenase (acetyl-transferr...	gene14239:106607477, gene7265:106600850	0.01731
48	MF	GO:0030215	semaphorin receptor binding	gene16545:106609631, gene28033:106566773, gene37579:106576484, gene40238:106579272, gene43926:106582759	0.01786
49	MF	GO:0036122	BMP binding	gene12239:100194549, gene14147:106607269, gene7367:106601000	0.01908
50	MF	GO:0015291	secondary active transmembrane transport...	gene12169:106605517, gene15708:106608835, gene16405:106609517, gene16406:106609518, gene21423:106560616, gene24195:106563187, gene27233:106566182, gene27580:106566494, gene30307:106569207, gene33022:106571856, gene35081:106573936, gene37490:100306766, gene37492:106576408, gene38905:106577803, gene3906:106579373, gene43895:106582726, gene45776:106584498, gene47866:106586629, gene47988:106586777, g…	0.02087
51	MF	GO:0010844	recombination hotspot binding	gene11742:106605100, gene4308:106583350	0.02188
52	MF	GO:1902282	voltage-gated potassium channel activity...	gene42916:106581833, gene47388:106586155	0.02688
53	MF	GO:0043733	DNA-3-methylbase glycosylase activity	gene14024:106607370, gene7495:106601084	0.02688
54	MF	GO:0004115	3',5'-cyclic-AMP phosphodiesterase activ...	gene43038:106581900, gene44907:106583711, gene45278:106584037	0.0269
55	MF	GO:0004887	thyroid hormone receptor activity	gene14213:106607496, gene4157:106582110, gene7293:106600825	0.0269
56	MF	GO:0043426	MRF binding	gene10745:106604170, gene19280:106612265, gene22767:100196456	0.0269
57	MF	GO:0051082	unfolded protein binding	gene18601:106611620, gene25124:106564265, gene2866:106569712, gene29339:106568146, gene31513:106570375, gene32862:100380418, gene34008:106572869, gene44314:106583068, gene5189:106591679, gene7092:106600736, gene7385:106601018	0.02702
58	MF	GO:0000976	transcription regulatory region sequence...	gene10188:106603639, gene10316:106603784, gene10527:100136800, gene11900:100136378, gene12283:106605616, gene12426:106605776, gene13759:106606985, gene13819:106607038, gene13852:106607080, gene14213:106607496, gene16077:106609245, gene17030:106610114, gene17688:106610738, gene20042:106612968, gene21413:106560604, gene21752:100136415, gene23370:106562514, gene2377:106564765, gene24890:106564020, g…	0.03067
59	MF	GO:0016709	oxidoreductase activity, acting on paire...	gene1080:106604807, gene31312:106570209, gene37891:106576803, gene3869:106579093, gene44393:106583179	0.03115
60	MF	GO:0016176	superoxide-generating NADPH oxidase acti...	gene13298:106606647, gene8110:106601740	0.03229
61	MF	GO:0038121	C-C motif chemokine 21 receptor activity	gene29763:100195489, gene5779:106597311	0.03229
62	MF	GO:0038117	C-C motif chemokine 19 receptor activity	gene29763:100195489, gene5779:106597311	0.03229
63	MF	GO:0005451	monovalent cation:proton antiporter acti...	gene35081:106573936, gene47988:106586777	0.03229
64	MF	GO:0035757	chemokine (C-C motif) ligand 19 binding	gene29763:100195489, gene5779:106597311	0.03229
65	MF	GO:0035758	chemokine (C-C motif) ligand 21 binding	gene29763:100195489, gene5779:106597311	0.03229
66	MF	GO:0070330	aromatase activity	gene23207:100136926, gene48784:100136916	0.03229
67	MF	GO:0019957	C-C chemokine binding	gene19537:106612723, gene29763:100195489, gene5779:106597311	0.03292
68	MF	GO:0019958	C-X-C chemokine binding	gene12205:100195464, gene29763:100195489, gene5779:106597311	0.03617
69	MF	GO:0004874	aryl hydrocarbon receptor activity	gene40806:106579687, gene51815:106590294	0.03808
70	MF	GO:0008140	cAMP response element binding protein bi...	gene19475:106612460, gene21822:106560921, gene39631:106578540, gene50303:106588784	0.03922
71	MF	GO:0005179	hormone activity	gene15897:106608992, gene22776:100136362, gene23931:106563105, gene30438:106569328, gene66991:106593557	0.04065
72	MF	GO:0019956	chemokine binding	gene12205:100195464, gene19537:106612723, gene29763:100195489, gene5779:106597311	0.04178
73	MF	GO:0004351	glutamate decarboxylase activity	gene47448:106586218, gene61616:106594092	0.04424
74	MF	GO:0051959	dynein light intermediate chain binding	gene42253:106581181, gene5146:106591471	0.04424
75	MF	GO:0015271	outward rectifier potassium channel acti...	gene2377:106564765, gene26953:106566038	0.04424
76	MF	GO:0034061	DNA polymerase activity	gene1444:106609062, gene25678:106564905, gene2866:106569712, gene4626:106586546	0.04444
77	BP	GO:0000122	negative regulation of transcription fro...	gene10188:106603639, gene10527:100136800, gene10745:106604170, gene11900:100136378, gene12283:106605616, gene1267:106608700, gene13819:106607038, gene13852:106607080, gene13869:106607101, gene14213:106607496, gene14257:106607467, gene14867:106608058, gene16077:106609245, gene16957:106610049, gene16958:106610047, gene17030:106610114, gene17040:106610132, gene17176:106610269, gene17315:106610378, g…	7.9e-08
78	BP	GO:0010871	negative regulation of receptor biosynth...	gene11900:100136378, gene14213:106607496, gene21752:100136415, gene23931:106563105, gene33675:106572511, gene4157:106582110, gene44423:106583303, gene44664:100136532, gene7293:106600825	5.2e-07
79	BP	GO:0010729	positive regulation of hydrogen peroxide...	gene16957:106610049, gene17030:106610114, gene17040:106610132, gene8919:106602468, gene8931:106602492, gene8937:106602503, gene8939:106602502, gene8961:106602616	1.9e-06
80	BP	GO:0071294	cellular response to zinc ion	gene23370:106562514, gene24890:106564020, gene24921:106564056, gene25248:106564415, gene25257:106564400, gene34963:106573838, gene36500:106575385, gene37043:106575958, gene39631:106578540, gene5347:106593117, gene8891:106602461	4.6e-06
81	BP	GO:0003333	amino acid transmembrane transport	gene12169:106605517, gene15708:106608835, gene16405:106609517, gene16406:106609518, gene27233:106566182, gene27580:106566494, gene33022:106571856, gene37490:100306766, gene37492:106576408, gene38905:106577803, gene3906:106579373, gene43895:106582726, gene45776:106584498, gene52133:106590589	6.4e-06
82	BP	GO:0045629	negative regulation of T-helper 2 cell d...	gene10316:106603784, gene21413:106560604, gene24903:106564036, gene24921:106564056, gene24923:106564050, gene25257:106564400, gene25337:106564484, gene34963:106573838, gene5437:106594023, gene54536:106591075, gene5612:106595687, gene66762:106593206	8.4e-06
83	BP	GO:0070859	positive regulation of bile acid biosynt...	gene11900:100136378, gene14213:106607496, gene4157:106582110, gene44423:106583303, gene7293:106600825	1.4e-05
84	BP	GO:0002437	inflammatory response to antigenic stimu...	gene10316:106603784, gene12205:100195464, gene14486:106607709, gene24903:106564036, gene24921:106564056, gene24923:106564050, gene25257:106564400, gene25337:106564484, gene29763:100195489, gene34963:106573838, gene5437:106594023, gene54536:106591075, gene5612:106595687, gene5779:106597311, gene66762:106593206	1.7e-05
85	BP	GO:0048662	negative regulation of smooth muscle cel...	gene14867:106608058, gene15578:106608616, gene18957:106611923, gene21338:106560529, gene21752:100136415, gene23931:106563105, gene38727:106577610, gene44664:100136532, gene4980:106590030, gene5016:106590330, gene50696:106589124	2.2e-05
86	BP	GO:0014912	negative regulation of smooth muscle cel...	gene14867:106608058, gene15578:106608616, gene15839:106608947, gene17163:106610255, gene18957:106611923, gene21752:100136415, gene23931:106563105, gene38727:106577610, gene44664:100136532, gene50696:106589124	5.2e-05
87	BP	GO:0043433	negative regulation of sequence-specific...	gene1080:106604807, gene14867:106608058, gene19475:106612460, gene21822:106560921, gene24903:106564036, gene24908:106564038, gene25337:106564484, gene25803:106564804, gene25972:106565262, gene32945:106571833, gene37075:100194838, gene3746:106578085, gene37891:106576803, gene44393:106583179, gene49118:106587891, gene4980:106590030, gene5016:106590330, gene50303:106588784, gene50592:106589020, gene…	5.6e-05
88	BP	GO:0035995	detection of muscle stretch	gene12239:100194549, gene14147:106607269, gene22767:100196456, gene7367:106601000	5.7e-05
89	BP	GO:0060086	circadian temperature homeostasis	gene11900:100136378, gene14213:106607496, gene4157:106582110, gene44423:106583303, gene7293:106600825	6.3e-05
90	BP	GO:0060613	fat pad development	gene20272:106613267, gene20633:106613622, gene23866:106563080, gene2731:106568345, gene41477:100196201, gene46493:100136541, gene54545:106595576	8e-05
91	BP	GO:0051552	flavone metabolic process	gene15578:106608616, gene18957:106611923, gene38727:106577610, gene43113:106581954	9.2e-05
92	BP	GO:0045668	negative regulation of osteoblast differ...	gene11332:106604687, gene24903:106564036, gene24908:106564038, gene25972:106565262, gene2715:106567959, gene32945:106571833, gene3903:106579350, gene40238:106579272, gene52402:106590982, gene5437:106594023, gene54536:106591075, gene5454:106594195, gene5559:106595152, gene57355:106592182, gene63321:106591221, gene7028:106600678, gene8093:106601729	9.7e-05
93	BP	GO:0035290	trunk segmentation	gene16545:106609631, gene16958:106610047, gene17040:106610132, gene28033:106566773, gene37579:106576484, gene43926:106582759, gene8870:106602413, gene8884:106602445, gene8930:106602495, gene8961:106602616	0.00012
94	BP	GO:0045600	positive regulation of fat cell differen...	gene10188:106603639, gene11332:106604687, gene12283:106605616, gene16267:106609456, gene21752:100136415, gene28336:100194884, gene28770:106567727, gene30398:100196464, gene33633:106572480, gene3746:106578085, gene3772:106577891, gene39631:106578540, gene44664:100136532, gene50592:106589020, gene66991:106593557	0.00018
95	BP	GO:0034154	toll-like receptor 7 signaling pathway	gene13819:106607038, gene281:106566099, gene29991:106568945, gene41477:100196201, gene46493:100136541, gene6196:106599020, gene771:106601178	0.00026
96	BP	GO:0046069	cGMP catabolic process	gene43038:106581900, gene44907:106583711, gene53461:106597306, gene9916:106603240	0.00029
97	BP	GO:0007608	sensory perception of smell	gene11005:106604396, gene17911:106611037, gene25731:106564859, gene28224:106567102, gene29462:106568409, gene31303:106569856, gene34008:106572869, gene4454:106585074, gene44907:106583711, gene45278:106584037, gene54545:106595576	0.00032
98	BP	GO:0044321	response to leptin	gene11900:100136378, gene14213:106607496, gene4157:106582110, gene44423:106583303, gene50210:106588640, gene54545:106595576, gene7293:106600825	0.00034
99	BP	GO:0035206	regulation of hemocyte proliferation	gene16958:106610047, gene17040:106610132, gene30132:106568833, gene497:106589077, gene8870:106602413, gene8884:106602445, gene8930:106602495, gene8961:106602616	0.00036
100	BP	GO:0034144	negative regulation of toll-like recepto...	gene11900:100136378, gene14213:106607496, gene4157:106582110, gene44423:106583303, gene7293:106600825	0.00037
101	BP	GO:0071222	cellular response to lipopolysaccharide	gene11900:100136378, gene13819:106607038, gene14213:106607496, gene14867:106608058, gene15578:106608616, gene15839:106608947, gene16267:106609456, gene18957:106611923, gene21752:100136415, gene29991:106568945, gene33081:106571913, gene33633:106572480, gene38124:106577006, gene38727:106577610, gene4157:106582110, gene43038:106581900, gene44423:106583303, gene44664:100136532, gene45278:106584037, g…	0.00039
102	BP	GO:0007402	ganglion mother cell fate determination	gene16958:106610047, gene17040:106610132, gene8870:106602413, gene8884:106602445, gene8930:106602495, gene8961:106602616	0.0004
103	BP	GO:2000189	positive regulation of cholesterol homeo...	gene11900:100136378, gene14213:106607496, gene4157:106582110, gene44423:106583303, gene7293:106600825	0.00045
104	BP	GO:0035681	toll-like receptor 15 signaling pathway	gene13819:106607038, gene29991:106568945, gene41477:100196201, gene46493:100136541, gene6196:106599020, gene771:106601178	0.00047
105	BP	GO:0035682	toll-like receptor 21 signaling pathway	gene13819:106607038, gene29991:106568945, gene41477:100196201, gene46493:100136541, gene6196:106599020, gene771:106601178	0.00047
106	BP	GO:1903546	protein localization to photoreceptor ou...	gene26964:106566029, gene43883:106582603, gene54545:106595576	0.00061
107	BP	GO:0035634	response to stilbenoid	gene15578:106608616, gene18957:106611923, gene38727:106577610	0.00061
108	BP	GO:0007329	positive regulation of transcription fro...	gene15578:106608616, gene18957:106611923, gene38727:106577610	0.00061
109	BP	GO:2000184	positive regulation of progesterone bios...	gene15578:106608616, gene18957:106611923, gene38727:106577610	0.00061
110	BP	GO:0036273	response to statin	gene15578:106608616, gene18957:106611923, gene38727:106577610	0.00061
111	BP	GO:0044252	negative regulation of multicellular org...	gene11349:106604700, gene20633:106613622, gene21752:100136415, gene23866:106563080, gene2731:106568345, gene44664:100136532	0.00062
112	BP	GO:0006198	cAMP catabolic process	gene43038:106581900, gene44907:106583711, gene45278:106584037, gene53461:106597306, gene816:106601984, gene9916:106603240	0.00062
113	BP	GO:0035947	regulation of gluconeogenesis by regulat...	gene11900:100136378, gene14213:106607496, gene31634:106570503, gene4157:106582110, gene44423:106583303, gene7293:106600825	0.00071
114	BP	GO:0071456	cellular response to hypoxia	gene14239:106607477, gene15578:106608616, gene15839:106608947, gene18957:106611923, gene20272:106613267, gene21752:100136415, gene22212:106561415, gene30432:106569334, gene37470:100286427, gene38727:106577610, gene3903:106579350, gene41477:100196201, gene44393:106583179, gene44664:100136532, gene4559:106585804, gene46454:106585026, gene46493:100136541, gene46613:100196040, gene47988:106586777, ge…	0.00074
115	BP	GO:0002573	myeloid leukocyte differentiation	gene13819:106607038, gene14867:106608058, gene15578:106608616, gene16267:106609456, gene17688:106610738, gene21338:106560529, gene23183:106562338, gene23243:106562395, gene23931:106563105, gene27600:106566511, gene28336:100194884, gene29763:100195489, gene29991:106568945, gene30398:100196464, gene32601:106571544, gene33081:106571913, gene33633:106572480, gene38727:106577610, gene39142:106578008, …	0.00077
116	BP	GO:0097267	omega-hydroxylase P450 pathway	gene1080:106604807, gene37891:106576803, gene41902:106580755	0.00095
117	BP	GO:0071228	cellular response to tumor cell	gene20633:106613622, gene23866:106563080, gene2731:106568345	0.00095
118	BP	GO:0070098	chemokine-mediated signaling pathway	gene12205:100195464, gene22701:106561865, gene29190:106568109, gene29763:100195489, gene3746:106578085, gene42905:106581841, gene47375:100306754, gene5779:106597311, gene6708:106600212	0.00098
119	BP	GO:0061332	Malpighian tubule bud morphogenesis	gene16958:106610047, gene17040:106610132, gene8870:106602413, gene8884:106602445, gene8930:106602495, gene8961:106602616	0.00104
120	BP	GO:0008210	estrogen metabolic process	gene1080:106604807, gene27743:100196324, gene28224:106567102, gene29822:106568727, gene37891:106576803, gene43113:106581954, gene49118:106587891	0.00105
121	BP	GO:0061469	regulation of type B pancreatic cell pro...	gene11900:100136378, gene14213:106607496, gene4157:106582110, gene44423:106583303, gene7293:106600825	0.00108
122	BP	GO:2000507	positive regulation of energy homeostasi...	gene15578:106608616, gene18957:106611923, gene38727:106577610, gene66991:106593557	0.00113
123	BP	GO:0035419	activation of MAPK activity involved in ...	gene13819:106607038, gene29991:106568945, gene41477:100196201, gene46493:100136541, gene6196:106599020, gene771:106601178	0.00117
124	BP	GO:1901860	positive regulation of mitochondrial DNA...	gene15578:106608616, gene18957:106611923, gene38727:106577610	0.0014
125	BP	GO:1901558	response to metformin	gene15578:106608616, gene18957:106611923, gene38727:106577610	0.0014
126	BP	GO:1901030	positive regulation of mitochondrial out...	gene16957:106610049, gene17030:106610114, gene17040:106610132, gene42253:106581181, gene5146:106591471, gene8919:106602468, gene8931:106602492, gene8937:106602503, gene8939:106602502, gene8961:106602616	0.00141
127	BP	GO:0035865	cellular response to potassium ion	gene15578:106608616, gene15839:106608947, gene18957:106611923, gene38727:106577610, gene7784:106601408	0.00147
128	BP	GO:0007354	zygotic determination of anterior/poster...	gene16958:106610047, gene17040:106610132, gene8870:106602413, gene8884:106602445, gene8930:106602495, gene8961:106602616	0.00148
129	BP	GO:0001817	regulation of cytokine production	gene1080:106604807, gene11414:106604810, gene12065:100194515, gene12283:106605616, gene13241:106606595, gene14867:106608058, gene15839:106608947, gene16267:106609456, gene16567:106609653, gene16957:106610049, gene17634:100379103, gene19537:106612723, gene21338:106560529, gene21413:106560604, gene23931:106563105, gene2424:106565855, gene25803:106564804, gene28044:106567318, gene281:106566099, gene…	0.0015
130	BP	GO:0035864	response to potassium ion	gene15578:106608616, gene15839:106608947, gene18957:106611923, gene28816:106567683, gene38727:106577610, gene42360:106581096, gene44299:106583079, gene48247:106587027, gene7784:106601408	0.00168
131	BP	GO:1903045	neural crest cell migration involved in ...	gene16545:106609631, gene28033:106566773, gene37579:106576484, gene43926:106582759	0.00172
132	BP	GO:0045661	regulation of myoblast differentiation	gene10527:100136800, gene16267:106609456, gene21338:106560529, gene21752:100136415, gene24384:106563418, gene26325:106565435, gene30725:106569611, gene44664:100136532, gene47438:106586209, gene57355:106592182, gene8093:106601729	0.00178
133	BP	GO:0071871	response to epinephrine	gene15578:106608616, gene18957:106611923, gene22212:106561415, gene38727:106577610, gene43038:106581900, gene45278:106584037, gene47988:106586777	0.00184
134	BP	GO:0045820	negative regulation of glycolytic proces...	gene15578:106608616, gene18957:106611923, gene21752:100136415, gene38292:106577211, gene38727:106577610, gene44664:100136532	0.00184
135	BP	GO:0046632	alpha-beta T cell differentiation	gene10188:106603639, gene10316:106603784, gene14213:106607496, gene15897:106608992, gene21150:106560326, gene21413:106560604, gene24903:106564036, gene24921:106564056, gene24923:106564050, gene25257:106564400, gene25337:106564484, gene281:106566099, gene28770:106567727, gene32601:106571544, gene33081:106571913, gene34963:106573838, gene39142:106578008, gene42948:106581806, gene45383:106584172, ge…	0.00189
136	BP	GO:0030241	skeletal muscle myosin thick filament as...	gene12239:100194549, gene14147:106607269, gene32862:100380418, gene37209:106576111, gene7367:106601000	0.00194
137	BP	GO:0031651	negative regulation of heat generation	gene20633:106613622, gene23866:106563080, gene2731:106568345	0.00196
138	BP	GO:2000288	positive regulation of myoblast prolifer...	gene10527:100136800, gene21752:100136415, gene44664:100136532	0.00196
139	BP	GO:0090327	negative regulation of locomotion involv...	gene20633:106613622, gene23866:106563080, gene2731:106568345	0.00196
140	BP	GO:0042167	heme catabolic process	gene43113:106581954, gene4980:106590030, gene5016:106590330	0.00196
141	BP	GO:0045637	regulation of myeloid cell differentiati...	gene10188:106603639, gene12283:106605616, gene14867:106608058, gene15578:106608616, gene16267:106609456, gene17688:106610738, gene19537:106612723, gene21338:106560529, gene22701:106561865, gene23183:106562338, gene23243:106562395, gene23931:106563105, gene24908:106564038, gene25066:106564203, gene27600:106566511, gene28336:100194884, gene28770:106567727, gene29991:106568945, gene33633:106572480, …	0.00216
142	BP	GO:0071877	regulation of adrenergic receptor signal...	gene20633:106613622, gene21124:106560302, gene23866:106563080, gene2731:106568345, gene6061:106598526	0.00221
143	BP	GO:0032354	response to follicle-stimulating hormone	gene1080:106604807, gene15578:106608616, gene15839:106608947, gene18957:106611923, gene37891:106576803, gene38727:106577610	0.00227
144	BP	GO:1901857	positive regulation of cellular respirat...	gene15578:106608616, gene18957:106611923, gene38727:106577610, gene44095:106582923	0.00249
145	BP	GO:0048769	sarcomerogenesis	gene12239:100194549, gene14147:106607269, gene32862:100380418, gene7367:106601000	0.00249
146	BP	GO:0045945	positive regulation of transcription fro...	gene22017:100196378, gene28336:100194884, gene30398:100196464, gene33633:106572480, gene41894:100136356, gene6556:106599802	0.00251
147	BP	GO:2001014	regulation of skeletal muscle cell diffe...	gene11900:100136378, gene14213:106607496, gene26325:106565435, gene4157:106582110, gene44423:106583303, gene47438:106586209, gene7293:106600825	0.00259
148	BP	GO:0032764	negative regulation of mast cell cytokin...	gene21413:106560604, gene4980:106590030, gene5016:106590330	0.00265
149	BP	GO:0050893	sensory processing	gene17911:106611037, gene54545:106595576, gene7946:106601574	0.00265
150	BP	GO:0010868	negative regulation of triglyceride bios...	gene19475:106612460, gene21822:106560921, gene50303:106588784	0.00265
151	BP	GO:0005978	glycogen biosynthetic process	gene11900:100136378, gene14213:106607496, gene14807:106608000, gene2285:106563715, gene2866:106569712, gene41477:100196201, gene4157:106582110, gene42203:106581056, gene44423:106583303, gene46493:100136541, gene7293:106600825	0.00315
152	BP	GO:0035095	behavioral response to nicotine	gene21752:100136415, gene44664:100136532, gene48502:106587222	0.00346
153	BP	GO:1902107	positive regulation of leukocyte differe...	gene10188:106603639, gene14867:106608058, gene15578:106608616, gene15897:106608992, gene23183:106562338, gene23243:106562395, gene27600:106566511, gene28770:106567727, gene29991:106568945, gene322:106570387, gene32862:100380418, gene38727:106577610, gene39142:106578008, gene39479:106578384, gene39631:106578540, gene5014:106590316, gene50696:106589124, gene52078:100380496, gene5277:106592430, gene…	0.0035
154	BP	GO:1900119	positive regulation of execution phase o...	gene12205:100195464, gene22212:106561415, gene38104:106576990, gene44393:106583179, gene6126:106598886	0.0036
155	BP	GO:2000505	regulation of energy homeostasis	gene11900:100136378, gene14213:106607496, gene15578:106608616, gene18957:106611923, gene38727:106577610, gene4157:106582110, gene44423:106583303, gene66991:106593557, gene7293:106600825	0.00393
156	BP	GO:0060385	axonogenesis involved in innervation	gene16545:106609631, gene28033:106566773, gene37579:106576484, gene43926:106582759, gene7784:106601408	0.00402
157	BP	GO:0042752	regulation of circadian rhythm	gene11332:106604687, gene11900:100136378, gene14213:106607496, gene15578:106608616, gene18957:106611923, gene19475:106612460, gene21752:100136415, gene21822:106560921, gene26953:106566038, gene28692:106567574, gene38727:106577610, gene39631:106578540, gene4157:106582110, gene43885:106582617, gene44423:106583303, gene44664:100136532, gene50303:106588784, gene7293:106600825	0.00406
158	BP	GO:0040034	regulation of development, heterochronic	gene15839:106608947, gene16958:106610047, gene17040:106610132, gene497:106589077, gene8870:106602413, gene8884:106602445, gene8930:106602495, gene8961:106602616	0.00413
159	BP	GO:0035994	response to muscle stretch	gene12239:100194549, gene14147:106607269, gene16267:106609456, gene22767:100196456, gene23754:106562910, gene29991:106568945, gene47988:106586777, gene50210:106588640, gene6196:106599020, gene7367:106601000, gene771:106601178	0.00429
160	BP	GO:0002408	myeloid dendritic cell chemotaxis	gene2424:106565855, gene29763:100195489, gene5779:106597311	0.00441
161	BP	GO:0071250	cellular response to nitrite	gene15578:106608616, gene18957:106611923, gene38727:106577610	0.00441
162	BP	GO:0051930	regulation of sensory perception of pain	gene2715:106567959, gene28816:106567683, gene42360:106581096, gene43885:106582617, gene47988:106586777, gene50210:106588640, gene7809:100195471	0.00442
163	BP	GO:0002717	positive regulation of natural killer ce...	gene2441:106565324, gene30519:106569380, gene322:106570387, gene39142:106578008, gene42294:106581151, gene5014:106590316, gene5277:106592430	0.00442
164	BP	GO:0015695	organic cation transport	gene15708:106608835, gene18047:106611136, gene217:106560243, gene35081:106573936, gene38905:106577803	0.00448
165	BP	GO:0046320	regulation of fatty acid oxidation	gene14239:106607477, gene14486:106607709, gene15543:106608647, gene15578:106608616, gene18957:106611923, gene21752:100136415, gene38727:106577610, gene44664:100136532, gene7265:106600850	0.00461
166	BP	GO:1903375	facioacoustic ganglion development	gene16545:106609631, gene28033:106566773, gene37579:106576484, gene43926:106582759	0.00468
167	BP	GO:0021828	gonadotrophin-releasing hormone neuronal...	gene16545:106609631, gene28033:106566773, gene37579:106576484, gene43926:106582759	0.00468
168	BP	GO:0050873	brown fat cell differentiation	gene16267:106609456, gene21124:106560302, gene28336:100194884, gene30398:100196464, gene33633:106572480, gene34330:106573244, gene38727:106577610, gene6061:106598526, gene66991:106593557	0.00487
169	BP	GO:0071333	cellular response to glucose stimulus	gene11349:106604700, gene11900:100136378, gene14213:106607496, gene14239:106607477, gene15578:106608616, gene15839:106608947, gene18957:106611923, gene20272:106613267, gene22400:100136366, gene30438:106569328, gene30909:106569781, gene37075:100194838, gene38727:106577610, gene4157:106582110, gene41894:100136356, gene44423:106583303, gene46248:106585191, gene7265:106600850, gene7293:106600825, gen…	0.00491
170	BP	GO:0060666	dichotomous subdivision of terminal unit...	gene14540:100194970, gene16545:106609631, gene28033:106566773, gene37579:106576484, gene43926:106582759	0.00498
171	BP	GO:0035641	locomotory exploration behavior	gene30438:106569328, gene47448:106586218, gene61616:106594092, gene7946:106601574, gene9650:106603100	0.00498
172	BP	GO:0071371	cellular response to gonadotropin stimul...	gene1080:106604807, gene15578:106608616, gene15839:106608947, gene18957:106611923, gene37891:106576803, gene38727:106577610	0.00516
173	BP	GO:0001659	temperature homeostasis	gene11414:106604810, gene11900:100136378, gene14213:106607496, gene14486:106607709, gene20633:106613622, gene23866:106563080, gene2731:106568345, gene38727:106577610, gene39142:106578008, gene4157:106582110, gene43885:106582617, gene44423:106583303, gene50210:106588640, gene5277:106592430, gene7293:106600825	0.0055
174	BP	GO:0032922	circadian regulation of gene expression	gene11332:106604687, gene11900:100136378, gene14213:106607496, gene15578:106608616, gene18957:106611923, gene21752:100136415, gene28692:106567574, gene38727:106577610, gene39631:106578540, gene4157:106582110, gene44423:106583303, gene44664:100136532, gene7293:106600825	0.00566
175	BP	GO:0019933	cAMP-mediated signaling	gene12205:100195464, gene19139:100194634, gene21124:106560302, gene30438:106569328, gene3932:106579570, gene39631:106578540, gene43038:106581900, gene45278:106584037, gene53461:106597306, gene6061:106598526, gene9916:106603240	0.00601
176	BP	GO:0006111	regulation of gluconeogenesis	gene11900:100136378, gene14213:106607496, gene14239:106607477, gene19475:106612460, gene21752:100136415, gene21822:106560921, gene31634:106570503, gene38727:106577610, gene4157:106582110, gene44423:106583303, gene44664:100136532, gene50303:106588784, gene7265:106600850, gene7293:106600825	0.00603
177	BP	GO:0007400	neuroblast fate determination	gene16958:106610047, gene17040:106610132, gene8870:106602413, gene8884:106602445, gene8930:106602495, gene8961:106602616	0.00607
178	BP	GO:0008015	blood circulation	gene10527:100136800, gene11414:106604810, gene12205:100195464, gene12239:100194549, gene14147:106607269, gene14486:106607709, gene14540:100194970, gene16545:106609631, gene17176:106610269, gene20272:106613267, gene20824:106613792, gene21124:106560302, gene21178:106560363, gene21338:106560529, gene21752:100136415, gene22767:100196456, gene23754:106562910, gene2377:106564765, gene23931:106563105, g…	0.00611
179	BP	GO:2000377	regulation of reactive oxygen species me...	gene1080:106604807, gene11414:106604810, gene14239:106607477, gene14257:106607467, gene16267:106609456, gene16957:106610049, gene17030:106610114, gene17040:106610132, gene21150:106560326, gene22212:106561415, gene29339:106568146, gene32862:100380418, gene37891:106576803, gene39142:106578008, gene42253:106581181, gene42580:106581433, gene44393:106583179, gene45383:106584172, gene4714:106587516, ge…	0.00612
180	BP	GO:0032328	alanine transport	gene16405:106609517, gene37490:100306766, gene37492:106576408, gene38905:106577803	0.00614
181	BP	GO:0036486	ventral trunk neural crest cell migratio...	gene16545:106609631, gene28033:106566773, gene37579:106576484, gene43926:106582759	0.00614
182	BP	GO:0097490	sympathetic neuron projection extension	gene16545:106609631, gene28033:106566773, gene37579:106576484, gene43926:106582759	0.00614
183	BP	GO:0097491	sympathetic neuron projection guidance	gene16545:106609631, gene28033:106566773, gene37579:106576484, gene43926:106582759	0.00614
184	BP	GO:0035094	response to nicotine	gene14486:106607709, gene15839:106608947, gene20824:106613792, gene21752:100136415, gene29994:106568943, gene39631:106578540, gene44664:100136532, gene48502:106587222, gene4980:106590030, gene5016:106590330, gene50210:106588640, gene771:106601178	0.00617
185	BP	GO:0090023	positive regulation of neutrophil chemot...	gene12205:100195464, gene2424:106565855, gene29763:100195489, gene3980:106580063, gene43924:106582757, gene50210:106588640, gene5779:106597311	0.00625
186	BP	GO:0035711	T-helper 1 cell activation	gene28336:100194884, gene33633:106572480	0.00672
187	BP	GO:0018990	ecdysis, chitin-based cuticle	gene14213:106607496, gene4157:106582110	0.00672
188	BP	GO:0071387	cellular response to cortisol stimulus	gene1080:106604807, gene37891:106576803	0.00672
189	BP	GO:0017143	insecticide metabolic process	gene1080:106604807, gene37891:106576803	0.00672
190	BP	GO:0071603	endothelial cell-cell adhesion	gene1080:106604807, gene37891:106576803, gene3980:106580063	0.00674
191	BP	GO:0033159	negative regulation of protein import in...	gene49118:106587891, gene53461:106597306, gene9916:106603240	0.00674
192	BP	GO:1902679	negative regulation of RNA biosynthetic ...	gene10188:106603639, gene10316:106603784, gene10527:100136800, gene10745:106604170, gene1080:106604807, gene11900:100136378, gene12283:106605616, gene1267:106608700, gene13819:106607038, gene13852:106607080, gene13869:106607101, gene14213:106607496, gene14257:106607467, gene14867:106608058, gene15578:106608616, gene16077:106609245, gene16957:106610049, gene16958:106610047, gene17030:106610114, ge…	0.00753
193	BP	GO:0032609	interferon-gamma production	gene21150:106560326, gene29763:100195489, gene30132:106568833, gene32894:106571561, gene33081:106571913, gene39142:106578008, gene42948:106581806, gene45278:106584037, gene45383:106584172, gene47264:106586018, gene5277:106592430, gene5779:106597311, gene6159:106598934	0.00786
194	BP	GO:0030240	skeletal muscle thin filament assembly	gene12239:100194549, gene14147:106607269, gene32862:100380418, gene7367:106601000	0.00789
195	BP	GO:0048642	negative regulation of skeletal muscle t...	gene10745:106604170, gene1267:106608700, gene19280:106612265, gene26325:106565435, gene28692:106567574	0.00805
196	BP	GO:0070389	chaperone cofactor-dependent protein ref...	gene25124:106564265, gene2866:106569712, gene5189:106591679	0.00813
197	BP	GO:0048521	negative regulation of behavior	gene14540:100194970, gene16545:106609631, gene17163:106610255, gene20633:106613622, gene23866:106563080, gene2731:106568345, gene28033:106566773, gene29190:106568109, gene30438:106569328, gene37579:106576484, gene43885:106582617, gene43926:106582759	0.00831
198	BP	GO:0061028	establishment of endothelial barrier	gene11349:106604700, gene15930:106609018, gene38104:106576990, gene38743:106577623, gene43271:106582091, gene45278:106584037, gene47264:106586018, gene53461:106597306, gene9916:106603240	0.00853
199	BP	GO:0008038	neuron recognition	gene14486:106607709, gene16545:106609631, gene25538:106564658, gene28033:106566773, gene29190:106568109, gene30132:106568833, gene37579:106576484, gene42253:106581181, gene42905:106581841, gene43926:106582759, gene46248:106585191, gene47375:100306754, gene5146:106591471, gene6708:106600212, gene9906:106603368	0.00875
200	BP	GO:0042769	DNA damage response, detection of DNA da...	gene12283:106605616, gene3772:106577891, gene41477:100196201, gene45762:106584460, gene46186:106585245, gene46493:100136541	0.00945
201	BP	GO:0006776	vitamin A metabolic process	gene21752:100136415, gene44664:100136532, gene48544:101448035	0.00968
202	BP	GO:0071332	cellular response to fructose stimulus	gene15578:106608616, gene18957:106611923, gene38727:106577610	0.00968
203	BP	GO:0021888	hypothalamus gonadotrophin-releasing hor...	gene16545:106609631, gene28033:106566773, gene37579:106576484, gene41477:100196201, gene43926:106582759, gene46493:100136541	0.0098
204	BP	GO:0014805	smooth muscle adaptation	gene4980:106590030, gene5016:106590330	0.0099
205	BP	GO:0035482	gastric motility	gene25538:106564658, gene30438:106569328	0.0099
206	BP	GO:0042904	9-cis-retinoic acid biosynthetic process	gene1080:106604807, gene37891:106576803	0.0099
207	BP	GO:0045081	negative regulation of interleukin-10 bi...	gene14867:106608058, gene50696:106589124	0.0099
208	BP	GO:0035993	deltoid tuberosity development	gene10527:100136800, gene25972:106565262	0.0099
209	BP	GO:0019287	isopentenyl diphosphate biosynthetic pro...	gene12039:106605469, gene46974:106585666	0.0099
210	BP	GO:0016038	absorption of visible light	gene1100:106604996, gene5752:106597204	0.0099
211	BP	GO:0032098	regulation of appetite	gene15897:106608992, gene21752:100136415, gene44664:100136532, gene54545:106595576	0.00993
212	BP	GO:0045582	positive regulation of T cell differenti...	gene10188:106603639, gene15897:106608992, gene28770:106567727, gene322:106570387, gene32862:100380418, gene39142:106578008, gene39479:106578384, gene5014:106590316, gene52078:100380496, gene5277:106592430, gene5779:106597311	0.0102
213	BP	GO:0045638	negative regulation of myeloid cell diff...	gene10188:106603639, gene12283:106605616, gene19537:106612723, gene21338:106560529, gene22701:106561865, gene23931:106563105, gene28770:106567727, gene3772:106577891, gene497:106589077, gene57355:106592182, gene73782:106593650, gene771:106601178, gene8093:106601729	0.01035
214	BP	GO:0035710	CD4-positive, alpha-beta T cell activati...	gene10316:106603784, gene21150:106560326, gene21413:106560604, gene24903:106564036, gene24921:106564056, gene24923:106564050, gene25257:106564400, gene25337:106564484, gene26624:106565874, gene281:106566099, gene28336:100194884, gene32601:106571544, gene33081:106571913, gene33633:106572480, gene34963:106573838, gene39142:106578008, gene45383:106584172, gene46613:100196040, gene5277:106592430, gen…	0.0105
215	BP	GO:0001912	positive regulation of leukocyte mediate...	gene15897:106608992, gene2441:106565324, gene30519:106569380, gene34008:106572869, gene39142:106578008, gene42294:106581151, gene47264:106586018, gene5277:106592430	0.01134
216	BP	GO:0035026	leading edge cell differentiation	gene25538:106564658, gene29991:106568945, gene6196:106599020	0.01139
217	BP	GO:0032792	negative regulation of CREB transcriptio...	gene19475:106612460, gene21822:106560921, gene50303:106588784	0.01139
218	BP	GO:0043201	response to leucine	gene15578:106608616, gene18957:106611923, gene38727:106577610	0.01139
219	BP	GO:0019373	epoxygenase P450 pathway	gene1080:106604807, gene37891:106576803, gene41902:106580755	0.01139
220	BP	GO:0042178	xenobiotic catabolic process	gene1080:106604807, gene37891:106576803, gene43113:106581954	0.01139
221	BP	GO:0001909	leukocyte mediated cytotoxicity	gene13298:106606647, gene15897:106608992, gene2441:106565324, gene30519:106569380, gene32042:106570903, gene32894:106571561, gene34008:106572869, gene39142:106578008, gene42294:106581151, gene47264:106586018, gene5277:106592430, gene8110:106601740, gene8765:106602328	0.01142
222	BP	GO:0035690	cellular response to drug	gene11349:106604700, gene15839:106608947, gene42916:106581833, gene44299:106583079, gene45278:106584037, gene45901:106584628, gene46613:100196040, gene47388:106586155, gene48247:106587027, gene50210:106588640, gene53461:106597306, gene9916:106603240	0.01173
223	BP	GO:0050919	negative chemotaxis	gene16545:106609631, gene28033:106566773, gene29190:106568109, gene30132:106568833, gene33675:106572511, gene37579:106576484, gene43926:106582759, gene46248:106585191	0.01191
224	BP	GO:0002438	acute inflammatory response to antigenic...	gene12205:100195464, gene14486:106607709, gene29763:100195489, gene5779:106597311	0.01228
225	BP	GO:0010738	regulation of protein kinase A signaling	gene23931:106563105, gene29156:106567763, gene43038:106581900, gene45278:106584037	0.01228
226	BP	GO:1903506	regulation of nucleic acid-templated tra...	gene10188:106603639, gene10316:106603784, gene10342:106603759, gene10527:100136800, gene10745:106604170, gene1080:106604807, gene11332:106604687, gene11349:106604700, gene11742:106605100, gene11900:100136378, gene12065:100194515, gene12205:100195464, gene12283:106605616, gene12426:106605776, gene1267:106608700, gene13759:106606985, gene13819:106607038, gene13852:106607080, gene13869:106607101, ge…	0.01317
227	CC	GO:0042734	presynaptic membrane	gene12163:106605512, gene14257:106607467, gene26953:106566038, gene31747:106570607, gene36296:106575175, gene3932:106579570, gene39564:106578473, gene43885:106582617, gene44299:106583079, gene4454:106585074, gene47448:106586218, gene53461:106597306, gene9916:106603240	0.001
228	CC	GO:0035189	Rb-E2F complex	gene23183:106562338, gene23243:106562395, gene28336:100194884, gene30398:100196464	0.0013
229	CC	GO:0036488	CHOP-C/EBP complex	gene28336:100194884, gene30398:100196464, gene33633:106572480	0.0013
230	CC	GO:0043020	NADPH oxidase complex	gene11414:106604810, gene13298:106606647, gene8110:106601740	0.0051
231	CC	GO:0001917	photoreceptor inner segment	gene1100:106604996, gene22701:106561865, gene26964:106566029, gene34008:106572869, gene43883:106582603, gene54545:106595576, gene5702:106596460, gene7946:106601574	0.0061
232	CC	GO:0000229	cytoplasmic chromosome	gene25678:106564905, gene4626:106586546	0.0064
233	CC	GO:0008076	voltage-gated potassium channel complex	gene2377:106564765, gene26953:106566038, gene28816:106567683, gene42360:106581096, gene42916:106581833, gene44299:106583079, gene4454:106585074, gene47388:106586155, gene9650:106603100	0.0084
234	CC	GO:0033597	mitotic checkpoint complex	gene30314:106569201, gene30492:106569402	0.013
235	CC	GO:0031232	extrinsic component of external side of ...	gene15839:106608947, gene21390:106560584	0.0215
236	CC	GO:0034752	cytosolic aryl hydrocarbon receptor comp...	gene40806:106579687, gene51815:106590294	0.0215
237	CC	GO:0034753	nuclear aryl hydrocarbon receptor comple...	gene40806:106579687, gene51815:106590294	0.0215
238	CC	GO:0005719	nuclear euchromatin	gene13819:106607038, gene15578:106608616, gene18957:106611923, gene38727:106577610, gene39357:106578255, gene39631:106578540, gene40305:106579217	0.0227
239	CC	GO:0045095	keratin filament	gene4683:106587847, gene4685:106587804, gene5506:106594684, gene60731:106592691	0.025
240	CC	GO:0035061	interchromatin granule	gene31513:106570375, gene44237:106583131	0.0317
241	CC	GO:0017053	transcriptional repressor complex	gene10188:106603639, gene12283:106605616, gene16958:106610047, gene17163:106610255, gene17634:100379103, gene20831:106613796, gene24493:106563652, gene28770:106567727, gene29991:106568945, gene33738:106572630, gene3772:106577891, gene6196:106599020, gene8765:106602328, gene8852:106602469	0.0352
242	CC	GO:0031528	microvillus membrane	gene23207:100136926, gene33675:106572511, gene43271:106582091, gene48784:100136916	0.0357
243	CC	GO:0030991	intraciliary transport particle A	gene26964:106566029, gene43883:106582603	0.0374
244	CC	GO:0005967	mitochondrial pyruvate dehydrogenase com...	gene14239:106607477, gene7265:106600850	0.0374
245	CC	GO:0034751	aryl hydrocarbon receptor complex	gene40806:106579687, gene51815:106590294	0.0374
246	CC	GO:0000791	euchromatin	gene13819:106607038, gene15578:106608616, gene18957:106611923, gene25693:106564893, gene38727:106577610, gene39357:106578255, gene39631:106578540, gene40305:106579217	0.0425
247	CC	GO:0008180	COP9 signalosome	gene28423:106567274, gene34008:106572869, gene37209:106576111, gene42253:106581181, gene5146:106591471, gene7092:106600736, gene7385:106601018	0.0433
248	CC	GO:0043204	perikaryon	gene18047:106611136, gene22212:106561415, gene25498:106564692, gene26953:106566038, gene30307:106569207, gene30438:106569328, gene34008:106572869, gene43038:106581900, gene44299:106583079, gene44744:106583415, gene46248:106585191, gene7809:100195471	0.0451
249	CC	GO:0034464	BBSome	gene17911:106611037, gene54545:106595576	0.0499
250	CC	GO:0033093	Weibel-Palade body	gene23754:106562910, gene50210:106588640	0.0499

## Sheet: BPplot
category	ID	term	count	genes	logFC	adj_pval	zscore	Treat	flag
BP	GO:0061178	regulation of insulin secretion involved...	9	GENE11900:100136378	2.02959	7.3e-06	3	LL	No overlap
BP	GO:2000505	regulation of energy homeostasis	7	GENE11900:100136378	2.02959	7.6e-06	2.64575	LL	LL, SP & SPLL
BP	GO:2001014	regulation of skeletal muscle cell diffe...	6	GENE11900:100136378	2.02959	9e-06	2.44949	LL	LL & SPLL
BP	GO:0032922	circadian regulation of gene expression	9	GENE11332:106604687	1.0358	2.1e-05	3	LL	LL, SP & SPLL
BP	GO:0042752	regulation of circadian rhythm	10	GENE11332:106604687	1.0358	0.00012	3.16228	LL	LL, SP & SPLL
BP	GO:0008037	cell recognition	13	GENE25538:106564658	1.99916	0.00027	3.05085	LL	No overlap
BP	GO:0045598	regulation of fat cell differentiation	10	GENE10188:106603639	1.81137	0.00036	3.16228	LL	No overlap
BP	GO:0007204	positive regulation of cytosolic calcium...	13	GENE14239:106607477	1.22298	0.00049	2.49615	LL	No overlap
BP	GO:0019722	calcium-mediated signaling	11	GENE13954:106607159	2.84294	0.00057	1.50756	LL	No overlap
BP	GO:0005978	glycogen biosynthetic process	6	GENE11900:100136378	2.02959	0.00077	2.44949	LL	LL & SPLL
BP	GO:0071456	cellular response to hypoxia	12	GENE13721:106606950	1.04276	0.00102	2.88675	LL	LL, SP & SPLL
BP	GO:0055072	iron ion homeostasis	7	GENE13721:106606950	1.04276	0.0014	2.64575	LL	No overlap
BP	GO:0007623	circadian rhythm	17	GENE11332:106604687	1.0358	0.00144	4.12311	LL	No overlap
BP	GO:0006885	regulation of pH	6	GENE14239:106607477	1.22298	0.00151	1.63299	LL	No overlap
BP	GO:0002027	regulation of heart rate	8	GENE13721:106606950	1.04276	0.00161	2.12132	LL	No overlap
BP	GO:0000302	response to reactive oxygen species	13	GENE14239:106607477	1.22298	0.00167	3.60555	LL	No overlap
BP	GO:0014070	response to organic cyclic compound	43	GENE11900:100136378	2.02959	0.00167	5.03245	LL	No overlap
BP	GO:0007186	G-protein coupled receptor signaling pat...	20	GENE1100:106604996	-1.83991	0.00191	2.23607	LL	No overlap
BP	GO:0001974	blood vessel remodeling	6	GENE13721:106606950	1.04276	0.00252	2.44949	LL	LL & SP
BP	GO:0071222	cellular response to lipopolysaccharide	9	GENE11900:100136378	2.02959	0.00257	2.33333	LL	LL & SPLL
BP	GO:0000122	negative regulation of transcription fro...	30	GENE10188:106603639	1.81137	0.00279	4.74693	LL	LL, SP & SPLL
BP	GO:0001569	patterning of blood vessels	6	GENE15093:106608273	1.44317	0.003	2.44949	LL	No overlap
BP	GO:0043627	response to estrogen	13	GENE18957:106611923	1.6301	0.00316	1.94145	LL	No overlap
BP	GO:0030334	regulation of cell migration	26	GENE14239:106607477	1.22298	0.00346	4.31455	LL	No overlap
BP	GO:0030099	myeloid cell differentiation	18	GENE10188:106603639	1.81137	0.00458	3.77124	LL	LL & SP
BP	GO:0007589	body fluid secretion	7	GENE10745:106604170	2.32526	0.00513	1.13389	LL	LL & SP
BP	GO:0006111	regulation of gluconeogenesis	9	GENE11900:100136378	2.02959	0.00517	3	LL	LL & SPLL
BP	GO:0043401	steroid hormone mediated signaling pathw...	10	GENE11900:100136378	2.02959	0.00529	2.52982	LL	No overlap
BP	GO:0010517	regulation of phospholipase activity	7	GENE14239:106607477	1.22298	0.0056	1.88982	LL	No overlap
BP	GO:0035914	skeletal muscle cell differentiation	11	GENE11900:100136378	2.02959	0.00562	3.31662	LL	LL & SP
BP	GO:0097305	response to alcohol	18	GENE14213:106607496	1.49318	0.00691	2.35702	LL	No overlap
BP	GO:0001678	cellular glucose homeostasis	15	GENE11900:100136378	2.02959	0.00712	3.35659	LL	No overlap
BP	GO:0070542	response to fatty acid	7	GENE14239:106607477	1.22298	0.00807	2.64575	LL	No overlap
BP	GO:0035150	regulation of tube size	8	GENE16064:106609152	1.34803	0.0096	2.12132	LL	No overlap
BP	GO:0071248	cellular response to metal ion	11	GENE15999:106609100	1.24525	0.01001	2.7136	LL	LL & SP
BP	GO:0000122	negative regulation of transcription fro...	224	GENE10079:106603496	1.10872	1e-13	1.33631	SP	LL, SP & SPLL
BP	GO:0002437	inflammatory response to antigenic stimu...	33	GENE10316:106603784	-1.15948	5.4e-11	-3.65563	SP	SP & SPLL
BP	GO:0045629	negative regulation of T-helper 2 cell d...	24	GENE10316:106603784	-1.15948	6.6e-10	-4.89898	SP	SP & SPLL
BP	GO:0045668	negative regulation of osteoblast differ...	38	GENE11332:106604687	1.99965	1.7e-09	0.648886	SP	SP & SPLL
BP	GO:0010729	positive regulation of hydrogen peroxide...	12	GENE16957:106610049	-1.35162	1.6e-07	-3.4641	SP	SP & SPLL
BP	GO:0048769	sarcomerogenesis	9	GENE12239:100194549	1.6296	1.8e-06	3	SP	No overlap
BP	GO:0060086	circadian temperature homeostasis	8	GENE11900:100136378	1.87477	1.9e-06	2.82843	SP	No overlap
BP	GO:0071294	cellular response to zinc ion	16	GENE16788:106609879	-1.14042	5.1e-06	-3.5	SP	SP & SPLL
BP	GO:0043433	negative regulation of sequence-specific...	53	GENE10664:106604092	1.54898	9.3e-06	0.137361	SP	SP & SPLL
BP	GO:0003333	amino acid transmembrane transport	21	GENE11330:106604686	-1.40404	1e-05	2.83683	SP	SP & SPLL
BP	GO:0070859	positive regulation of bile acid biosynt...	6	GENE11900:100136378	1.87477	4.6e-05	2.44949	SP	No overlap
BP	GO:0032922	circadian regulation of gene expression	28	GENE11332:106604687	1.99965	6.5e-05	3.77964	SP	LL, SP & SPLL
BP	GO:1901030	positive regulation of mitochondrial out...	18	GENE14303:106607436	-1.19448	0.0002	-2.82843	SP	SP & SPLL
BP	GO:0030240	skeletal muscle thin filament assembly	8	GENE12239:100194549	1.6296	0.00024	2.12132	SP	No overlap
BP	GO:0010871	negative regulation of receptor biosynth...	9	GENE11900:100136378	1.87477	0.00026	2.33333	SP	SP & SPLL
BP	GO:0021549	cerebellum development	40	GENE10740:106604165	-1.17275	0.0003	3.47851	SP	No overlap
BP	GO:0032570	response to progesterone	21	GENE1080:106604807	2.10884	0.00031	2.4004	SP	No overlap
BP	GO:0070886	positive regulation of calcineurin-NFAT ...	7	GENE22701:106561865	-3.16936	0.00032	1.13389	SP	No overlap
BP	GO:0034144	negative regulation of toll-like recepto...	7	GENE11900:100136378	1.87477	0.00032	2.64575	SP	No overlap
BP	GO:0035914	skeletal muscle cell differentiation	28	GENE11900:100136378	1.87477	0.00034	3.77964	SP	LL & SP
BP	GO:0046697	decidualization	13	GENE10944:106604295	1.76956	0.00035	0.27735	SP	No overlap
BP	GO:0009561	megagametogenesis	9	GENE11783:106605134	-1.41126	0.00039	1.66667	SP	No overlap
BP	GO:0035947	regulation of gluconeogenesis by regulat...	9	GENE11900:100136378	1.87477	0.00048	2.33333	SP	SP & SPLL
BP	GO:0040015	negative regulation of multicellular org...	9	GENE10944:106604295	1.76956	0.00058	1	SP	No overlap
BP	GO:0030241	skeletal muscle myosin thick filament as...	8	GENE12239:100194549	1.6296	0.0006	2.82843	SP	No overlap
BP	GO:0008407	chaeta morphogenesis	11	GENE14303:106607436	-1.19448	0.0007	-0.301511	SP	No overlap
BP	GO:0045909	positive regulation of vasodilation	15	GENE10970:106604332	1.13464	0.0008	2.84019	SP	No overlap
BP	GO:0030815	negative regulation of cAMP metabolic pr...	13	GENE18163:106611226	1.34883	0.00086	2.49615	SP	No overlap
BP	GO:0035701	hematopoietic stem cell migration	6	GENE25631:106564949	-1.10363	0.00097	-1.63299	SP	No overlap
BP	GO:0060137	maternal process involved in parturition	6	GENE1080:106604807	2.10884	0.00097	1.63299	SP	No overlap
BP	GO:0042026	protein refolding	11	GENE14920:106608137	1.82556	0.00121	2.7136	SP	No overlap
BP	GO:0022603	regulation of anatomical structure morph...	230	GENE10316:106603784	-1.15948	0.00125	3.82441	SP	No overlap
BP	GO:0061469	regulation of type B pancreatic cell pro...	7	GENE11900:100136378	1.87477	0.00138	2.64575	SP	No overlap
BP	GO:0010677	negative regulation of cellular carbohyd...	18	GENE11572:106604929	-1.81746	0.00139	2.35702	SP	No overlap
BP	GO:0048662	negative regulation of smooth muscle cel...	13	GENE15578:106608616	1.23741	0.00167	2.49615	SP	SP & SPLL
BP	GO:0071456	cellular response to hypoxia	43	GENE10424:106603870	1.13728	0.00171	3.50747	SP	LL, SP & SPLL
BP	GO:2000505	regulation of energy homeostasis	10	GENE11900:100136378	1.87477	0.00173	3.16228	SP	LL, SP & SPLL
BP	GO:0072337	modified amino acid transport	10	GENE11051:106604362	1.00689	0.00173	0.632456	SP	No overlap
BP	GO:0045892	negative regulation of transcription, DN...	317	GENE10079:106603496	1.10872	0.00177	1.9658	SP	No overlap
BP	GO:0006954	inflammatory response	125	GENE10117:106603470	-1.23222	0.00182	2.23607	SP	No overlap
BP	GO:0051384	response to glucocorticoid	45	GENE1080:106604807	2.10884	0.00184	2.23607	SP	No overlap
BP	GO:0043153	entrainment of circadian clock by photop...	13	GENE13088:106606447	-1.25647	0.00186	2.49615	SP	No overlap
BP	GO:0033962	cytoplasmic mRNA processing body assembl...	10	GENE12172:106605519	1.02517	0.00197	1.26491	SP	No overlap
BP	GO:0001547	antral ovarian follicle growth	6	GENE12026:106605376	-1.129	0.00207	-0.816497	SP	No overlap
BP	GO:0003009	skeletal muscle contraction	15	GENE10487:106603933	1.49659	0.00229	3.35659	SP	No overlap
BP	GO:0032496	response to lipopolysaccharide	67	GENE10703:106604126	1.79155	0.00249	3.78725	SP	No overlap
BP	GO:2000189	positive regulation of cholesterol homeo...	6	GENE11900:100136378	1.87477	0.0026	2.44949	SP	No overlap
BP	GO:2000849	regulation of glucocorticoid secretion	6	GENE31433:106570295	1.70733	0.0026	0.816497	SP	No overlap
BP	GO:2000637	positive regulation of gene silencing by...	6	GENE12172:106605519	1.02517	0.0026	2.44949	SP	No overlap
BP	GO:0001892	embryonic placenta development	40	GENE11932:106605293	-1.07021	0.00302	1.58114	SP	No overlap
BP	GO:0097285	cell-type specific apoptotic process	116	GENE10424:106603870	1.13728	0.00306	6.31364	SP	No overlap
BP	GO:0071398	cellular response to fatty acid	22	GENE14239:106607477	1.72726	0.00308	3.41121	SP	No overlap
BP	GO:0043305	negative regulation of mast cell degranu...	6	GENE10117:106603470	-1.23222	0.00321	0.816497	SP	No overlap
BP	GO:0030812	negative regulation of nucleotide catabo...	10	GENE15578:106608616	1.23741	0.00326	2.52982	SP	No overlap
BP	GO:0070098	chemokine-mediated signaling pathway	13	GENE22701:106561865	-3.16936	0.00334	1.38675	SP	SP & SPLL
BP	GO:2001256	regulation of store-operated calcium ent...	7	GENE10944:106604295	1.76956	0.00353	2.64575	SP	No overlap
BP	GO:0045600	positive regulation of fat cell differen...	21	GENE10188:106603639	2.53463	0.00357	2.4004	SP	SP & SPLL
BP	GO:0071875	adrenergic receptor signaling pathway	11	GENE10970:106604332	1.13464	0.00391	0.904534	SP	No overlap
BP	GO:0007256	activation of JNKK activity	6	GENE15496:106608687	1.2453	0.00393	1.63299	SP	No overlap
BP	GO:0032232	negative regulation of actin filament bu...	14	GENE15974:106609060	1.06799	0.00393	3.20713	SP	No overlap
BP	GO:0055065	metal ion homeostasis	106	GENE10487:106603933	1.49659	0.00408	4.46791	SP	No overlap
BP	GO:0019935	cyclic-nucleotide-mediated signaling	22	GENE11179:106604533	1.85047	0.00416	2.13201	SP	No overlap
BP	GO:0050877	neurological system process	160	GENE10424:106603870	1.13728	0.00416	4.26907	SP	No overlap
BP	GO:0046685	response to arsenic-containing substance	14	GENE10424:106603870	1.13728	0.00428	2.67261	SP	No overlap
BP	GO:0042752	regulation of circadian rhythm	38	GENE11332:106604687	1.99965	0.00449	4.21776	SP	LL, SP & SPLL
BP	GO:0035206	regulation of hemocyte proliferation	10	GENE16958:106610047	-1.05592	0.00459	-1.26491	SP	SP & SPLL
BP	GO:0031650	regulation of heat generation	6	GENE14486:106607709	-1.35478	0.00476	-0.816497	SP	No overlap
BP	GO:0032328	alanine transport	6	GENE16405:106609517	1.891	0.00476	1.63299	SP	No overlap
BP	GO:0001764	neuron migration	47	GENE10527:100136800	-1.0954	0.00494	1.89624	SP	No overlap
BP	GO:0007187	G-protein coupled receptor signaling pat...	30	GENE10970:106604332	1.13464	0.0051	2.19089	SP	No overlap
BP	GO:0048915	posterior lateral line system developmen...	8	GENE1306:106607506	-1.30864	0.00529	0	SP	No overlap
BP	GO:0030803	negative regulation of cyclic nucleotide...	11	GENE161:106607246	-2.59983	0.0053	2.11058	SP	No overlap
BP	GO:0030099	myeloid cell differentiation	106	GENE10188:106603639	2.53463	0.00549	2.91386	SP	LL & SP
BP	GO:0006355	regulation of transcription, DNA-templat...	545	GENE10079:106603496	1.10872	0.00581	0.214176	SP	No overlap
BP	GO:0035290	trunk segmentation	9	GENE16545:106609631	1.59553	0.00598	-1	SP	SP & SPLL
BP	GO:0003085	negative regulation of systemic arterial...	8	GENE10970:106604332	1.13464	0.00603	1.41421	SP	No overlap
BP	GO:0035094	response to nicotine	16	GENE11330:106604686	-1.40404	0.00605	1	SP	SP & SPLL
BP	GO:0048145	regulation of fibroblast proliferation	27	GENE13767:106606991	1.19784	0.0064	2.11695	SP	No overlap
BP	GO:0000083	regulation of transcription involved in ...	11	GENE12026:106605376	-1.129	0.00643	-1.50756	SP	No overlap
BP	GO:0042093	T-helper cell differentiation	38	GENE10316:106603784	-1.15948	0.00664	-3.24443	SP	No overlap
BP	GO:0033629	negative regulation of cell adhesion med...	6	GENE1080:106604807	2.10884	0.00679	0.816497	SP	No overlap
BP	GO:1901989	positive regulation of cell cycle phase ...	26	GENE1080:106604807	2.10884	0.00712	0.392232	SP	No overlap
BP	GO:0043619	regulation of transcription from RNA pol...	8	GENE12423:106605774	1.04377	0.00775	2.12132	SP	No overlap
BP	GO:0044321	response to leptin	8	GENE11900:100136378	1.87477	0.00775	1.41421	SP	SP & SPLL
BP	GO:0010107	potassium ion import	8	GENE18049:106611134	-2.24348	0.00775	0.707107	SP	No overlap
BP	GO:0045742	positive regulation of epidermal growth ...	8	GENE25498:106564692	1.53893	0.00775	0	SP	No overlap
BP	GO:0045670	regulation of osteoclast differentiation	21	GENE13951:106607161	1.59975	0.00802	1.96396	SP	No overlap
BP	GO:0001525	angiogenesis	101	GENE10500:106603948	1.81787	0.00866	7.06476	SP	No overlap
BP	GO:0001655	urogenital system development	98	GENE10188:106603639	2.53463	0.00868	3.83858	SP	No overlap
BP	GO:0071459	protein localization to chromosome, cent...	7	GENE20799:106613773	1.47423	0.00873	1.88982	SP	No overlap
BP	GO:0014821	phasic smooth muscle contraction	7	GENE13172:106606520	1.46745	0.00873	1.13389	SP	No overlap
BP	GO:0000902	cell morphogenesis	318	GENE10316:106603784	-1.15948	0.00915	4.14971	SP	No overlap
BP	GO:1900372	negative regulation of purine nucleotide...	11	GENE161:106607246	-2.59983	0.00924	2.11058	SP	No overlap
BP	GO:0042073	intraciliary transport	9	GENE14303:106607436	-1.19448	0.00927	-2.33333	SP	No overlap
BP	GO:0048875	chemical homeostasis within a tissue	9	GENE12423:106605774	1.04377	0.00927	3	SP	No overlap
BP	GO:0048469	cell maturation	57	GENE10079:106603496	1.10872	0.0094	4.10605	SP	No overlap
BP	GO:0003281	ventricular septum development	21	GENE10527:100136800	-1.0954	0.0094	2.4004	SP	No overlap
BP	GO:0071248	cellular response to metal ion	52	GENE1198:106606339	-1.07209	0.00945	0.27735	SP	LL & SP
BP	GO:0035864	response to potassium ion	8	GENE15578:106608616	1.23741	0.00981	2.12132	SP	SP & SPLL
BP	GO:0072707	cellular response to sodium dodecyl sulf...	7	GENE12936:106606295	-1.1923	0.00996	-2.64575	SP	No overlap
BP	GO:0045445	myoblast differentiation	24	GENE10527:100136800	-1.0954	0.01016	2.44949	SP	No overlap
BP	GO:0048146	positive regulation of fibroblast prolif...	18	GENE13767:106606991	1.19784	0.01022	1.41421	SP	No overlap
BP	GO:0019933	cAMP-mediated signaling	18	GENE11179:106604533	1.85047	0.01022	1.88562	SP	SP & SPLL
BP	GO:0046683	response to organophosphorus	38	GENE1080:106604807	2.10884	0.01022	3.24443	SP	No overlap
BP	GO:0007589	body fluid secretion	28	GENE10745:106604170	2.1115	0.01022	1.13389	SP	LL & SP
BP	GO:0060446	branching involved in open tracheal syst...	9	GENE14632:106607817	-1.04547	0.01027	1.66667	SP	No overlap
BP	GO:0042310	vasoconstriction	23	GENE11572:106604929	-1.81746	0.01029	2.29366	SP	No overlap
BP	GO:0030818	negative regulation of cAMP biosynthetic...	10	GENE20449:106613437	1.1631	0.01031	2.52982	SP	No overlap
BP	GO:0043067	regulation of programmed cell death	308	GENE10188:106603639	2.53463	0.01036	4.67238	SP	No overlap
BP	GO:0030855	epithelial cell differentiation	148	GENE1080:106604807	2.10884	0.01048	4.60317	SP	No overlap
BP	GO:0000185	activation of MAPKKK activity	6	GENE21150:106560326	-1.66905	0.01093	0.816497	SP	No overlap
BP	GO:0048286	lung alveolus development	19	GENE10852:100196483	1.00914	0.01094	2.52357	SP	No overlap
BP	GO:0007588	excretion	20	GENE10944:106604295	1.76956	0.01097	1.78885	SP	No overlap
BP	GO:0001974	blood vessel remodeling	20	GENE10852:100196483	1.00914	0.01099	3.1305	SP	LL & SP
BP	GO:0071385	cellular response to glucocorticoid stim...	18	GENE1080:106604807	2.10884	0.01103	1.88562	SP	No overlap
BP	GO:0002711	positive regulation of T cell mediated i...	10	GENE15897:106608992	1.21347	0.01129	2.52982	SP	No overlap
BP	GO:0055119	relaxation of cardiac muscle	10	GENE10487:106603933	1.49659	0.01129	1.26491	SP	No overlap
BP	GO:0071345	cellular response to cytokine stimulus	121	GENE10117:106603470	-1.23222	0.0116	2.09091	SP	No overlap
BP	GO:0030336	negative regulation of cell migration	57	GENE10117:106603470	-1.23222	0.01161	3.04642	SP	No overlap
BP	GO:0007600	sensory perception	89	GENE1080:106604807	2.10884	0.012	2.86199	SP	No overlap
BP	GO:0051497	negative regulation of stress fiber asse...	12	GENE15974:106609060	1.06799	0.01222	2.88675	SP	No overlap
BP	GO:0000122	negative regulation of transcription fro...	106	GENE10188:106603639	1.2627	7.9e-08	-0.582772	SPLL	LL, SP & SPLL
BP	GO:0010871	negative regulation of receptor biosynth...	9	GENE11900:100136378	1.73424	5.2e-07	2.33333	SPLL	SP & SPLL
BP	GO:0010729	positive regulation of hydrogen peroxide...	8	GENE16957:106610049	-1.27217	1.9e-06	-2.82843	SPLL	SP & SPLL
BP	GO:0071294	cellular response to zinc ion	11	GENE23370:106562514	-1.23308	4.6e-06	-2.7136	SPLL	SP & SPLL
BP	GO:0003333	amino acid transmembrane transport	14	GENE12169:106605517	2.54762	6.4e-06	3.20713	SPLL	SP & SPLL
BP	GO:0045629	negative regulation of T-helper 2 cell d...	12	GENE10316:106603784	-1.22084	8.4e-06	-2.88675	SPLL	SP & SPLL
BP	GO:0002437	inflammatory response to antigenic stimu...	15	GENE10316:106603784	-1.22084	1.7e-05	-2.84019	SPLL	SP & SPLL
BP	GO:0048662	negative regulation of smooth muscle cel...	11	GENE14867:106608058	-1.0687	2.2e-05	2.11058	SPLL	SP & SPLL
BP	GO:0014912	negative regulation of smooth muscle cel...	10	GENE14867:106608058	-1.0687	5.2e-05	1.89737	SPLL	No overlap
BP	GO:0043433	negative regulation of sequence-specific...	29	GENE1080:106604807	1.60707	5.6e-05	-0.185695	SPLL	SP & SPLL
BP	GO:0060613	fat pad development	7	GENE20272:106613267	-2.11816	8e-05	-1.88982	SPLL	No overlap
BP	GO:0045668	negative regulation of osteoblast differ...	17	GENE11332:106604687	1.62649	9.7e-05	-0.727607	SPLL	SP & SPLL
BP	GO:0035290	trunk segmentation	10	GENE16545:106609631	1.32603	0.00012	-0.632456	SPLL	SP & SPLL
BP	GO:0045600	positive regulation of fat cell differen...	15	GENE10188:106603639	1.2627	0.00018	2.84019	SPLL	SP & SPLL
BP	GO:0034154	toll-like receptor 7 signaling pathway	7	GENE13819:106607038	-1.03182	0.00026	-0.377964	SPLL	No overlap
BP	GO:0007608	sensory perception of smell	11	GENE11005:106604396	-1.22186	0.00032	-0.301511	SPLL	No overlap
BP	GO:0044321	response to leptin	7	GENE11900:100136378	1.73424	0.00034	1.13389	SPLL	SP & SPLL
BP	GO:0035206	regulation of hemocyte proliferation	8	GENE16958:106610047	-1.07908	0.00036	-2.12132	SPLL	SP & SPLL
BP	GO:0071222	cellular response to lipopolysaccharide	24	GENE11900:100136378	1.73424	0.00039	2.44949	SPLL	LL & SPLL
BP	GO:0007402	ganglion mother cell fate determination	6	GENE16958:106610047	-1.07908	0.0004	-2.44949	SPLL	No overlap
BP	GO:0035681	toll-like receptor 15 signaling pathway	6	GENE13819:106607038	-1.03182	0.00047	0	SPLL	No overlap
BP	GO:0035682	toll-like receptor 21 signaling pathway	6	GENE13819:106607038	-1.03182	0.00047	0	SPLL	No overlap
BP	GO:0044252	negative regulation of multicellular org...	6	GENE11349:106604700	-1.03725	0.00062	-0.816497	SPLL	No overlap
BP	GO:0006198	cAMP catabolic process	6	GENE43038:106581900	-1.52247	0.00062	0	SPLL	No overlap
BP	GO:0035947	regulation of gluconeogenesis by regulat...	6	GENE11900:100136378	1.73424	0.00071	1.63299	SPLL	SP & SPLL
BP	GO:0071456	cellular response to hypoxia	25	GENE14239:106607477	1.82888	0.00074	1	SPLL	LL, SP & SPLL
BP	GO:0002573	myeloid leukocyte differentiation	33	GENE13819:106607038	-1.03182	0.00077	1.91485	SPLL	No overlap
BP	GO:0070098	chemokine-mediated signaling pathway	9	GENE12205:100195464	-1.33046	0.00098	1	SPLL	SP & SPLL
BP	GO:0061332	Malpighian tubule bud morphogenesis	6	GENE16958:106610047	-1.07908	0.00104	-2.44949	SPLL	No overlap
BP	GO:0008210	estrogen metabolic process	7	GENE1080:106604807	1.60707	0.00105	1.13389	SPLL	No overlap
BP	GO:0035419	activation of MAPK activity involved in ...	6	GENE13819:106607038	-1.03182	0.00117	0	SPLL	No overlap
BP	GO:1901030	positive regulation of mitochondrial out...	10	GENE16957:106610049	-1.27217	0.00141	-3.16228	SPLL	SP & SPLL
BP	GO:0007354	zygotic determination of anterior/poster...	6	GENE16958:106610047	-1.07908	0.00148	-2.44949	SPLL	No overlap
BP	GO:0001817	regulation of cytokine production	66	GENE1080:106604807	1.60707	0.0015	-0.492366	SPLL	No overlap
BP	GO:0035864	response to potassium ion	9	GENE15578:106608616	1.15942	0.00168	1.66667	SPLL	SP & SPLL
BP	GO:0045661	regulation of myoblast differentiation	11	GENE10527:100136800	-1.25061	0.00178	0.904534	SPLL	No overlap
BP	GO:0071871	response to epinephrine	7	GENE15578:106608616	1.15942	0.00184	1.13389	SPLL	No overlap
BP	GO:0045820	negative regulation of glycolytic proces...	6	GENE15578:106608616	1.15942	0.00184	1.63299	SPLL	No overlap
BP	GO:0046632	alpha-beta T cell differentiation	28	GENE10188:106603639	1.2627	0.00189	-2.26779	SPLL	No overlap
BP	GO:0045637	regulation of myeloid cell differentiati...	30	GENE10188:106603639	1.2627	0.00216	2.19089	SPLL	No overlap
BP	GO:0032354	response to follicle-stimulating hormone	6	GENE1080:106604807	1.60707	0.00227	2.44949	SPLL	No overlap
BP	GO:0045945	positive regulation of transcription fro...	6	GENE22017:100196378	1.39022	0.00251	1.63299	SPLL	No overlap
BP	GO:2001014	regulation of skeletal muscle cell diffe...	7	GENE11900:100136378	1.73424	0.00259	2.64575	SPLL	LL & SPLL
BP	GO:0005978	glycogen biosynthetic process	11	GENE11900:100136378	1.73424	0.00315	0.904534	SPLL	LL & SPLL
BP	GO:1902107	positive regulation of leukocyte differe...	20	GENE10188:106603639	1.2627	0.0035	1.78885	SPLL	No overlap
BP	GO:2000505	regulation of energy homeostasis	9	GENE11900:100136378	1.73424	0.00393	3	SPLL	LL, SP & SPLL
BP	GO:0042752	regulation of circadian rhythm	18	GENE11332:106604687	1.62649	0.00406	2.82843	SPLL	LL, SP & SPLL
BP	GO:0040034	regulation of development, heterochronic	8	GENE15839:106608947	1.4835	0.00413	-1.41421	SPLL	No overlap
BP	GO:0035994	response to muscle stretch	11	GENE12239:100194549	2.16713	0.00429	1.50756	SPLL	No overlap
BP	GO:0051930	regulation of sensory perception of pain	7	GENE2715:106567959	2.33095	0.00442	-0.377964	SPLL	No overlap
BP	GO:0002717	positive regulation of natural killer ce...	7	GENE2441:106565324	1.00079	0.00442	-0.377964	SPLL	No overlap
BP	GO:0046320	regulation of fatty acid oxidation	9	GENE14239:106607477	1.82888	0.00461	1.66667	SPLL	No overlap
BP	GO:0050873	brown fat cell differentiation	9	GENE16267:106609456	-1.892	0.00487	1.66667	SPLL	No overlap
BP	GO:0071333	cellular response to glucose stimulus	20	GENE11349:106604700	-1.03725	0.00491	1.78885	SPLL	No overlap
BP	GO:0071371	cellular response to gonadotropin stimul...	6	GENE1080:106604807	1.60707	0.00516	2.44949	SPLL	No overlap
BP	GO:0001659	temperature homeostasis	15	GENE11414:106604810	-1.89811	0.0055	-0.258199	SPLL	No overlap
BP	GO:0032922	circadian regulation of gene expression	13	GENE11332:106604687	1.62649	0.00566	3.05085	SPLL	LL, SP & SPLL
BP	GO:0019933	cAMP-mediated signaling	11	GENE12205:100195464	-1.33046	0.00601	0.301511	SPLL	SP & SPLL
BP	GO:0006111	regulation of gluconeogenesis	14	GENE11900:100136378	1.73424	0.00603	2.67261	SPLL	LL & SPLL
BP	GO:0007400	neuroblast fate determination	6	GENE16958:106610047	-1.07908	0.00607	-2.44949	SPLL	No overlap
BP	GO:0008015	blood circulation	58	GENE10527:100136800	-1.25061	0.00611	1.31306	SPLL	No overlap
BP	GO:2000377	regulation of reactive oxygen species me...	31	GENE1080:106604807	1.60707	0.00612	-0.179605	SPLL	No overlap
BP	GO:0035094	response to nicotine	12	GENE14486:106607709	-1.21764	0.00617	1.1547	SPLL	SP & SPLL
BP	GO:0090023	positive regulation of neutrophil chemot...	7	GENE12205:100195464	-1.33046	0.00625	-0.377964	SPLL	No overlap
BP	GO:1902679	negative regulation of RNA biosynthetic ...	157	GENE10188:106603639	1.2627	0.00753	-1.35675	SPLL	No overlap
BP	GO:0032609	interferon-gamma production	13	GENE21150:106560326	-1.07003	0.00786	-0.27735	SPLL	No overlap
BP	GO:0048521	negative regulation of behavior	12	GENE14540:100194970	1.11118	0.00831	0.57735	SPLL	No overlap
BP	GO:0061028	establishment of endothelial barrier	9	GENE11349:106604700	-1.03725	0.00853	0.333333	SPLL	No overlap
BP	GO:0008038	neuron recognition	15	GENE14486:106607709	-1.21764	0.00875	0.774597	SPLL	No overlap
BP	GO:0042769	DNA damage response, detection of DNA da...	6	GENE12283:106605616	1.41066	0.00945	-0.816497	SPLL	No overlap
BP	GO:0021888	hypothalamus gonadotrophin-releasing hor...	6	GENE16545:106609631	1.32603	0.0098	0.816497	SPLL	No overlap
BP	GO:0045582	positive regulation of T cell differenti...	11	GENE10188:106603639	1.2627	0.0102	0.301511	SPLL	No overlap
BP	GO:0045638	negative regulation of myeloid cell diff...	13	GENE10188:106603639	1.2627	0.01035	1.94145	SPLL	No overlap
BP	GO:0035710	CD4-positive, alpha-beta T cell activati...	25	GENE10316:106603784	-1.22084	0.0105	-2.6	SPLL	No overlap
BP	GO:0001912	positive regulation of leukocyte mediate...	8	GENE15897:106608992	1.37075	0.01134	0.707107	SPLL	No overlap
BP	GO:0001909	leukocyte mediated cytotoxicity	13	GENE13298:106606647	-1.73093	0.01142	0.27735	SPLL	No overlap
BP	GO:0035690	cellular response to drug	12	GENE11349:106604700	-1.03725	0.01173	-0.57735	SPLL	No overlap
BP	GO:0050919	negative chemotaxis	8	GENE16545:106609631	1.32603	0.01191	1.41421	SPLL	No overlap
BP	GO:1903506	regulation of nucleic acid-templated tra...	256	GENE10188:106603639	1.2627	0.01317	-4	SPLL	No overlap

## Sheet: MFplot
category	ID	term	count	genes	logFC	adj_pval	zscore	Treat	flag
MF	GO:0020037	heme binding	10	GENE11900:100136378	2.02959	1.6e-07	3.16228	LL	LL, SP & SPLL
MF	GO:0001078	transcriptional repressor activity, RNA ...	11	GENE11900:100136378	2.02959	7.8e-05	2.7136	LL	LL, SP & SPLL
MF	GO:0003707	steroid hormone receptor activity	6	GENE11900:100136378	2.02959	0.00012	1.63299	LL	LL, SP & SPLL
MF	GO:0001046	core promoter sequence-specific DNA bind...	10	GENE11900:100136378	2.02959	0.00013	2.52982	LL	LL, SP & SPLL
MF	GO:0000977	RNA polymerase II regulatory region sequ...	21	GENE10188:106603639	1.81137	0.00131	4.14614	LL	LL, SP & SPLL
MF	GO:0008144	drug binding	7	GENE26209:106565346	3.00779	0.00163	1.13389	LL	LL, SP & SPLL
MF	GO:0042803	protein homodimerization activity	25	GENE10188:106603639	1.81137	0.00175	3	LL	No overlap
MF	GO:0003714	transcription corepressor activity	11	GENE11900:100136378	2.02959	0.00309	3.31662	LL	LL, SP & SPLL
MF	GO:0004879	RNA polymerase II transcription factor a...	7	GENE11900:100136378	2.02959	0.0062	1.88982	LL	LL, SP & SPLL
MF	GO:0099600	transmembrane receptor activity	20	GENE1100:106604996	-1.83991	0.00814	3.57771	LL	No overlap
MF	GO:0030165	PDZ domain binding	7	GENE14257:106607467	1.39309	0.01073	2.64575	LL	No overlap
MF	GO:0038023	signaling receptor activity	27	GENE1100:106604996	-1.83991	0.01076	4.04145	LL	No overlap
MF	GO:0004888	transmembrane signaling receptor activit...	19	GENE1100:106604996	-1.83991	0.01093	3.44124	LL	No overlap
MF	GO:0019899	enzyme binding	48	GENE12981:106606328	1.04447	0.01175	4.6188	LL	No overlap
MF	GO:0004930	G-protein coupled receptor activity	12	GENE1100:106604996	-1.83991	0.01757	2.3094	LL	LL & SP
MF	GO:0008134	transcription factor binding	24	GENE10745:106604170	2.32526	0.01782	4.08248	LL	LL & SP
MF	GO:0031072	heat shock protein binding	6	GENE26209:106565346	3.00779	0.02225	2.44949	LL	LL & SP
MF	GO:0019902	phosphatase binding	9	GENE13954:106607159	2.84294	0.02318	2.33333	LL	No overlap
MF	GO:0016705	oxidoreductase activity, acting on paire...	7	GENE23207:100136926	3.07339	0.02837	1.88982	LL	No overlap
MF	GO:0004871	signal transducer activity	32	GENE1100:106604996	-1.83991	0.03771	3.88909	LL	No overlap
MF	GO:0008514	organic anion transmembrane transporter ...	7	GENE22400:100136366	1.17176	0.03969	2.64575	LL	No overlap
MF	GO:0003700	transcription factor activity, sequence-...	264	GENE10188:106603639	2.53463	2e-20	-3.44656	SP	SP & SPLL
MF	GO:0000977	RNA polymerase II regulatory region sequ...	156	GENE10188:106603639	2.53463	5.1e-14	0	SP	LL, SP & SPLL
MF	GO:0001046	core promoter sequence-specific DNA bind...	44	GENE11386:106604738	1.45581	1.7e-06	1.20605	SP	LL, SP & SPLL
MF	GO:0004930	G-protein coupled receptor activity	71	GENE10642:106604073	1.51526	2.6e-06	2.25489	SP	LL & SP
MF	GO:0003714	transcription corepressor activity	64	GENE10664:106604092	1.54898	7.5e-06	2.75	SP	LL, SP & SPLL
MF	GO:0001078	transcriptional repressor activity, RNA ...	46	GENE10527:100136800	-1.0954	8.1e-06	2.35907	SP	LL, SP & SPLL
MF	GO:0043565	sequence-specific DNA binding	244	GENE10188:106603639	2.53463	5.9e-05	-3.07289	SP	SP & SPLL
MF	GO:0016493	C-C chemokine receptor activity	9	GENE29763:100195489	1.67509	6e-05	1.66667	SP	No overlap
MF	GO:0016494	C-X-C chemokine receptor activity	8	GENE29763:100195489	1.67509	7.6e-05	2.82843	SP	SP & SPLL
MF	GO:0004879	RNA polymerase II transcription factor a...	20	GENE11900:100136378	1.87477	0.00012	2.23607	SP	LL, SP & SPLL
MF	GO:0003705	transcription factor activity, RNA polym...	46	GENE10188:106603639	2.53463	0.00013	1.47442	SP	SP & SPLL
MF	GO:0005328	neurotransmitter:sodium symporter activi...	9	GENE12169:106605517	3.79932	0.00016	3	SP	SP & SPLL
MF	GO:0042826	histone deacetylase binding	40	GENE19475:106612460	2.28945	0.00069	-1.58114	SP	SP & SPLL
MF	GO:0020037	heme binding	20	GENE10486:106603932	-1.18276	0.00143	3.1305	SP	LL, SP & SPLL
MF	GO:0001222	transcription corepressor binding	9	GENE11900:100136378	1.87477	0.00179	3	SP	No overlap
MF	GO:0097027	ubiquitin-protein transferase activator ...	7	GENE13726:106606946	-1.04303	0.00202	-1.13389	SP	No overlap
MF	GO:0023026	MHC class II protein complex binding	8	GENE14920:106608137	1.82556	0.00251	2.82843	SP	No overlap
MF	GO:0015175	neutral amino acid transmembrane transpo...	11	GENE11330:106604686	-1.40404	0.00275	1.50756	SP	SP & SPLL
MF	GO:0030235	nitric-oxide synthase regulator activity	9	GENE14303:106607436	-1.19448	0.00315	0.333333	SP	No overlap
MF	GO:0003677	DNA binding	355	GENE10079:106603496	1.10872	0.0032	-3.55599	SP	No overlap
MF	GO:0015293	symporter activity	25	GENE12169:106605517	3.79932	0.0036	3.8	SP	No overlap
MF	GO:0015171	amino acid transmembrane transporter act...	22	GENE11330:106604686	-1.40404	0.00392	2.55841	SP	SP & SPLL
MF	GO:0008134	transcription factor binding	136	GENE10079:106603496	1.10872	0.00464	5.48795	SP	LL & SP
MF	GO:0055131	C3HC4-type RING finger domain binding	6	GENE19986:106613013	1.50607	0.00468	0.816497	SP	No overlap
MF	GO:0072349	modified amino acid transmembrane transp...	6	GENE11051:106604362	1.00689	0.00468	0	SP	No overlap
MF	GO:0031072	heat shock protein binding	31	GENE1047:106604528	2.08771	0.0052	4.13092	SP	LL & SP
MF	GO:0000978	RNA polymerase II core promoter proximal...	74	GENE10377:100846970	-1.11084	0.00647	2.78994	SP	No overlap
MF	GO:0003707	steroid hormone receptor activity	14	GENE11900:100136378	1.87477	0.00668	1.06904	SP	LL, SP & SPLL
MF	GO:0000976	transcription regulatory region sequence...	191	GENE10188:106603639	2.53463	0.00762	-1.80894	SP	SP & SPLL
MF	GO:0008528	G-protein coupled peptide receptor activ...	27	GENE11695:106605056	-1.11646	0.00777	2.11695	SP	No overlap
MF	GO:0001077	transcriptional activator activity, RNA ...	58	GENE10377:100846970	-1.11084	0.00792	2.1009	SP	No overlap
MF	GO:0001190	transcriptional activator activity, RNA ...	21	GENE10527:100136800	-1.0954	0.00954	0.654654	SP	No overlap
MF	GO:0004953	icosanoid receptor activity	8	GENE21752:100136415	-1.29822	0.01076	1.41421	SP	No overlap
MF	GO:0042562	hormone binding	18	GENE21338:106560529	1.38893	0.0117	2.35702	SP	No overlap
MF	GO:0031420	alkali metal ion binding	8	GENE21673:106561047	-1.27372	0.012	-0.707107	SP	No overlap
MF	GO:1901682	sulfur compound transmembrane transporte...	8	GENE11330:106604686	-1.40404	0.01335	1.41421	SP	No overlap
MF	GO:0008144	drug binding	24	GENE10858:106604209	-1.14499	0.01401	1.63299	SP	LL, SP & SPLL
MF	GO:0032027	myosin light chain binding	6	GENE30373:106569150	2.53899	0.01632	2.44949	SP	No overlap
MF	GO:0031681	G-protein beta-subunit binding	6	GENE40143:106579016	1.81258	0.01632	-0.816497	SP	No overlap
MF	GO:0004620	phospholipase activity	17	GENE14878:106608063	1.80226	0.018	1.21268	SP	No overlap
MF	GO:0031701	angiotensin receptor binding	6	GENE20229:106613218	1.17952	0.01855	1.63299	SP	No overlap
MF	GO:0035591	signaling adaptor activity	21	GENE15601:106608778	1.53135	0.02053	1.96396	SP	No overlap
MF	GO:0071949	FAD binding	6	GENE18276:106611320	-1.22719	0.02098	1.63299	SP	No overlap
MF	GO:0000981	RNA polymerase II transcription factor a...	138	GENE10188:106603639	2.53463	0.02157	3.23477	SP	No overlap
MF	GO:0008140	cAMP response element binding protein bi...	7	GENE19475:106612460	2.28945	0.02197	1.88982	SP	No overlap
MF	GO:0001102	RNA polymerase II activating transcripti...	15	GENE10079:106603496	1.10872	0.02357	0.258199	SP	No overlap
MF	GO:0042165	neurotransmitter binding	6	GENE27233:106566182	1.74281	0.02362	1.63299	SP	No overlap
MF	GO:0005159	insulin-like growth factor receptor bind...	8	GENE15601:106608778	1.53135	0.02387	0.707107	SP	No overlap
MF	GO:0030955	potassium ion binding	6	GENE21673:106561047	-1.27372	0.02647	0	SP	No overlap
MF	GO:0004435	phosphatidylinositol phospholipase C act...	7	GENE14878:106608063	1.80226	0.02682	1.13389	SP	No overlap
MF	GO:0001085	RNA polymerase II transcription factor b...	34	GENE10079:106603496	1.10872	0.02683	1.02899	SP	No overlap
MF	GO:0008081	phosphoric diester hydrolase activity	15	GENE10012:106603555	1.90601	0.02912	1.29099	SP	No overlap
MF	GO:0001223	transcription coactivator binding	6	GENE20852:106613816	1.02626	0.02954	0.816497	SP	No overlap
MF	GO:0005158	insulin receptor binding	12	GENE14047:106607353	1.05557	0.03065	2.88675	SP	No overlap
MF	GO:0001227	transcriptional repressor activity, RNA ...	60	GENE10188:106603639	2.53463	0.03553	2.32379	SP	No overlap
MF	GO:0016298	lipase activity	18	GENE14878:106608063	1.80226	0.03764	0.942809	SP	No overlap
MF	GO:0051879	Hsp90 protein binding	12	GENE14920:106608137	1.82556	0.03862	2.88675	SP	No overlap
MF	GO:0005070	SH3/SH2 adaptor activity	15	GENE15974:106609060	1.06799	0.03917	0.774597	SP	No overlap
MF	GO:0001664	G-protein coupled receptor binding	40	GENE10487:106603933	1.49659	0.03973	2.52982	SP	No overlap
MF	GO:0019956	chemokine binding	9	GENE19537:106612723	-1.09747	0.0398	0.333333	SP	No overlap
MF	GO:0042813	Wnt-activated receptor activity	6	GENE28784:106567714	1.18603	0.04011	0	SP	No overlap
MF	GO:0035035	histone acetyltransferase binding	12	GENE13721:106606950	1.15512	0.04083	2.3094	SP	No overlap
MF	GO:0016831	carboxy-lyase activity	7	GENE14632:106607817	-1.04547	0.04198	-0.377964	SP	No overlap
MF	GO:0004629	phospholipase C activity	8	GENE14878:106608063	1.80226	0.0422	0.707107	SP	No overlap
MF	GO:0017046	peptide hormone binding	11	GENE21338:106560529	1.38893	0.0457	3.31662	SP	No overlap
MF	GO:0003700	transcription factor activity, sequence-...	129	GENE10188:106603639	1.2627	1.7e-10	-3.96203	SPLL	SP & SPLL
MF	GO:0000977	RNA polymerase II regulatory region sequ...	69	GENE10188:106603639	1.2627	1e-05	-1.08347	SPLL	LL, SP & SPLL
MF	GO:0016494	C-X-C chemokine receptor activity	6	GENE12205:100195464	-1.33046	4.7e-05	1.63299	SPLL	SP & SPLL
MF	GO:0043565	sequence-specific DNA binding	115	GENE10188:106603639	1.2627	8.4e-05	-4.19627	SPLL	SP & SPLL
MF	GO:0020037	heme binding	14	GENE1080:106604807	1.60707	0.00012	2.67261	SPLL	LL, SP & SPLL
MF	GO:0004879	RNA polymerase II transcription factor a...	12	GENE11900:100136378	1.73424	0.00027	1.73205	SPLL	LL, SP & SPLL
MF	GO:0005328	neurotransmitter:sodium symporter activi...	6	GENE12169:106605517	2.54762	0.00032	2.44949	SPLL	SP & SPLL
MF	GO:0003707	steroid hormone receptor activity	10	GENE11900:100136378	1.73424	0.00091	1.89737	SPLL	LL, SP & SPLL
MF	GO:0042826	histone deacetylase binding	22	GENE19475:106612460	1.3896	0.0011	-1.70561	SPLL	SP & SPLL
MF	GO:0001046	core promoter sequence-specific DNA bind...	20	GENE11900:100136378	1.73424	0.00121	-0.447214	SPLL	LL, SP & SPLL
MF	GO:0003714	transcription corepressor activity	30	GENE11900:100136378	1.73424	0.00122	0.730297	SPLL	LL, SP & SPLL
MF	GO:0008144	drug binding	16	GENE10858:106604209	-1.02895	0.00127	0.5	SPLL	LL, SP & SPLL
MF	GO:0015171	amino acid transmembrane transporter act...	14	GENE12169:106605517	2.54762	0.00145	3.20713	SPLL	SP & SPLL
MF	GO:0001078	transcriptional repressor activity, RNA ...	20	GENE10527:100136800	-1.25061	0.00489	1.78885	SPLL	LL, SP & SPLL
MF	GO:0003705	transcription factor activity, RNA polym...	24	GENE10188:106603639	1.2627	0.00759	0	SPLL	SP & SPLL
MF	GO:0015175	neutral amino acid transmembrane transpo...	6	GENE12169:106605517	2.54762	0.0115	2.44949	SPLL	SP & SPLL
MF	GO:0019955	cytokine binding	13	GENE10740:106604165	-1.16341	0.01435	1.38675	SPLL	No overlap
MF	GO:0015291	secondary active transmembrane transport...	20	GENE12169:106605517	2.54762	0.02087	4.02492	SPLL	No overlap
MF	GO:0051082	unfolded protein binding	11	GENE18601:106611620	-1.14746	0.02702	0.904534	SPLL	No overlap
MF	GO:0000976	transcription regulatory region sequence...	88	GENE10188:106603639	1.2627	0.03067	-2.98481	SPLL	SP & SPLL

## Sheet: CCplot
category	ID	term	count	genes	logFC	adj_pval	zscore	Treat	flag
CC	GO:0016323	basolateral plasma membrane	16	GENE14257:106607467	1.39309	9.2e-06	2.5	LL	LL & SP
CC	GO:0043679	axon terminus	10	GENE2377:106564765	2.00003	0.0022	1.89737	LL	No overlap
CC	GO:0044459	plasma membrane part	57	GENE1100:106604996	-1.83991	0.0026	4.63586	LL	No overlap
CC	GO:0098793	presynapse	13	GENE12163:106605512	1.06954	0.0027	3.05085	LL	No overlap
CC	GO:0016021	integral component of membrane	50	GENE1100:106604996	-1.83991	0.0043	4.52548	LL	No overlap
CC	GO:0016023	cytoplasmic, membrane-bounded vesicle	28	GENE12163:106605512	1.06954	0.0049	4.53557	LL	No overlap
CC	GO:0005737	cytoplasm	145	GENE10188:106603639	1.81137	0.0051	7.72323	LL	No overlap
CC	GO:0030425	dendrite	20	GENE11900:100136378	2.02959	0.0067	3.1305	LL	No overlap
CC	GO:0045202	synapse	31	GENE11900:100136378	2.02959	0.0073	3.4125	LL	No overlap
CC	GO:0016324	apical plasma membrane	12	GENE18767:106611738	1.24207	0.0076	2.3094	LL	No overlap
CC	GO:0009986	cell surface	20	GENE15093:106608273	1.44317	0.01	3.57771	LL	No overlap
CC	GO:0031226	intrinsic component of plasma membrane	24	GENE1100:106604996	-1.83991	0.014	3.26599	LL	No overlap
CC	GO:0016605	PML body	6	GENE10188:106603639	1.81137	0.0152	1.63299	LL	No overlap
CC	GO:0097458	neuron part	50	GENE1100:106604996	-1.83991	0.0175	4.52548	LL	No overlap
CC	GO:0044463	cell projection part	36	GENE1100:106604996	-1.83991	0.0195	3.66667	LL	No overlap
CC	GO:0016607	nuclear speck	7	GENE10188:106603639	1.81137	0.0217	1.88982	LL	No overlap
CC	GO:0005887	integral component of plasma membrane	22	GENE1100:106604996	-1.83991	0.0247	3.41121	LL	LL & SP
CC	GO:0043025	neuronal cell body	18	GENE18047:106611136	-2.06579	0.025	1.41421	LL	LL & SP
CC	GO:0043195	terminal bouton	6	GENE24198:106563184	1.88154	0.0256	1.63299	LL	No overlap
CC	GO:0012506	vesicle membrane	13	GENE12163:106605512	1.06954	0.0304	3.05085	LL	No overlap
CC	GO:0044297	cell body	19	GENE1100:106604996	-1.83991	0.0305	1.14708	LL	No overlap
CC	GO:0005886	plasma membrane	84	GENE10188:106603639	1.81137	0.0305	5.67367	LL	No overlap
CC	GO:0070161	anchoring junction	18	GENE14239:106607477	1.22298	0.0354	2.82843	LL	No overlap
CC	GO:0030659	cytoplasmic vesicle membrane	12	GENE12163:106605512	1.06954	0.0374	2.88675	LL	No overlap
CC	GO:0044433	cytoplasmic vesicle part	13	GENE12163:106605512	1.06954	0.0375	3.05085	LL	No overlap
CC	GO:0016604	nuclear body	11	GENE10188:106603639	1.81137	0.0384	2.11058	LL	LL & SP
CC	GO:0043197	dendritic spine	7	GENE11900:100136378	2.02959	0.0398	1.88982	LL	LL & SP
CC	GO:0098794	postsynapse	13	GENE11900:100136378	2.02959	0.0398	3.05085	LL	No overlap
CC	GO:0098590	plasma membrane region	33	GENE1100:106604996	-1.83991	0.0455	3.30748	LL	No overlap
CC	GO:0042995	cell projection	57	GENE1100:106604996	-1.83991	0.0459	4.63586	LL	No overlap
CC	GO:0044309	neuron spine	7	GENE11900:100136378	2.02959	0.0465	1.88982	LL	No overlap
CC	GO:0031674	I band	43	GENE10487:106603933	1.49659	0.00048	3.50747	SP	No overlap
CC	GO:0005887	integral component of plasma membrane	154	GENE10970:106604332	1.13464	0.00116	5.15727	SP	LL & SP
CC	GO:0097440	apical dendrite	10	GENE10424:106603870	1.13728	0.00461	2.52982	SP	No overlap
CC	GO:0016442	RISC complex	7	GENE12172:106605519	1.02517	0.00525	1.88982	SP	No overlap
CC	GO:0005903	brush border	33	GENE10852:100196483	1.00914	0.00633	4.7001	SP	No overlap
CC	GO:0043197	dendritic spine	40	GENE10970:106604332	1.13464	0.00943	4.11096	SP	LL & SP
CC	GO:0043025	neuronal cell body	116	GENE10740:106604165	-1.17275	0.0099	5.57086	SP	LL & SP
CC	GO:0045095	keratin filament	7	GENE29761:106568670	1.15438	0.01046	-1.13389	SP	No overlap
CC	GO:0048786	presynaptic active zone	12	GENE29990:106568946	-1.39281	0.01093	0.57735	SP	No overlap
CC	GO:0030018	Z disc	32	GENE10500:106603948	1.81787	0.01172	2.82843	SP	No overlap
CC	GO:0017053	transcriptional repressor complex	28	GENE10079:106603496	1.10872	0.01326	1.51186	SP	SP & SPLL
CC	GO:0031983	vesicle lumen	13	GENE14920:106608137	1.82556	0.01444	3.60555	SP	No overlap
CC	GO:0001533	cornified envelope	6	GENE13787:106607014	2.11038	0.01549	2.44949	SP	No overlap
CC	GO:0001917	photoreceptor inner segment	12	GENE11179:106604533	1.85047	0.01692	1.1547	SP	SP & SPLL
CC	GO:0032279	asymmetric synapse	6	GENE19986:106613013	1.50607	0.01762	1.63299	SP	No overlap
CC	GO:0036064	ciliary basal body	18	GENE11236:106604590	-1.10961	0.01785	0	SP	No overlap
CC	GO:0031526	brush border membrane	14	GENE10852:100196483	1.00914	0.01911	2.67261	SP	No overlap
CC	GO:0005634	nucleus	771	GENE10040:106603530	1.38958	0.02132	2.19686	SP	No overlap
CC	GO:0000932	cytoplasmic mRNA processing body	18	GENE10735:106604162	-1.01379	0.02279	1.88562	SP	No overlap
CC	GO:0008180	COP9 signalosome	13	GENE14303:106607436	-1.19448	0.02543	1.38675	SP	SP & SPLL
CC	GO:0043198	dendritic shaft	16	GENE19986:106613013	1.50607	0.03036	3	SP	No overlap
CC	GO:0043204	perikaryon	23	GENE14920:106608137	1.82556	0.03132	1.4596	SP	SP & SPLL
CC	GO:0097542	ciliary tip	10	GENE14303:106607436	-1.19448	0.03291	-1.89737	SP	No overlap
CC	GO:0035102	PRC1 complex	7	GENE13726:106606946	-1.04303	0.03352	-1.13389	SP	No overlap
CC	GO:0032590	dendrite membrane	7	GENE161:106607246	-2.59983	0.03352	-0.377964	SP	No overlap
CC	GO:0030286	dynein complex	8	GENE14303:106607436	-1.19448	0.03417	-0.707107	SP	No overlap
CC	GO:0016323	basolateral plasma membrane	49	GENE10852:100196483	1.00914	0.03822	4.71429	SP	LL & SP
CC	GO:0043235	receptor complex	46	GENE10970:106604332	1.13464	0.03831	2.94884	SP	No overlap
CC	GO:0005667	transcription factor complex	70	GENE10527:100136800	-1.0954	0.03931	3.58569	SP	No overlap
CC	GO:0060205	cytoplasmic membrane-bounded vesicle lum...	10	GENE14920:106608137	1.82556	0.04251	3.16228	SP	No overlap
CC	GO:0016604	nuclear body	64	GENE10188:106603639	2.53463	0.04254	3.25	SP	LL & SP
CC	GO:0042734	presynaptic membrane	13	GENE12163:106605512	1.05117	0.001	0.27735	SPLL	No overlap
CC	GO:0001917	photoreceptor inner segment	8	GENE1100:106604996	-1.81467	0.0061	-0.707107	SPLL	SP & SPLL
CC	GO:0008076	voltage-gated potassium channel complex	9	GENE2377:106564765	2.21039	0.0084	-1	SPLL	No overlap
CC	GO:0005719	nuclear euchromatin	7	GENE13819:106607038	-1.03182	0.0227	0.377964	SPLL	No overlap
CC	GO:0017053	transcriptional repressor complex	14	GENE10188:106603639	1.2627	0.0352	0.534522	SPLL	SP & SPLL
CC	GO:0000791	euchromatin	8	GENE13819:106607038	-1.03182	0.0425	0	SPLL	No overlap
CC	GO:0008180	COP9 signalosome	7	GENE28423:106567274	2.15112	0.0433	0.377964	SPLL	SP & SPLL
CC	GO:0043204	perikaryon	12	GENE18047:106611136	-2.70004	0.0451	0	SPLL	SP & SPLL
